# Supplementary material for: Enhancing Structural Diversity of Lathyrane Derivatives through Biotransformation by the Marine-Derived Actinomycete <em>Streptomyces puniceus</em> BC-5GB.11
Source: Preprints.org preprint supplement (doi:10.20944/preprints202401.1881.v1), 2024-01-26
Supplement: Supplementary file 1 [file supplementary]

# **Enhancing structural diversity of lathyrane derivatives through biotransformation by the marine-derived actinomycete *Streptomyces puniceus* BC-5GB.11**

Felipe Escobar-Montaña <sup>1</sup>, Victoria E. González-Rodríguez <sup>2</sup>, Antonio J. Macías-Sánchez <sup>1,3</sup>, José M. Botubol-Ares <sup>1,\*</sup>, Rosa Durán-Patrón <sup>1,3,\*</sup>, Rosario Hernández-Galán <sup>1,3</sup>

<sup>1</sup> Departamento de Química Orgánica, Facultad de Ciencias, Universidad de Cádiz, Puerto Real, 11510 Cádiz, Spain.

<sup>2</sup> Departamento de Biomedicina, Biotecnología y Salud Pública, Laboratorio de Microbiología, Facultad de Ciencias del Mar y Ambientales, Universidad de Cádiz, Puerto Real, 11510 Cádiz, Spain.

<sup>3</sup> Instituto Universitario de Investigación en Biomoléculas, Universidad de Cádiz, Puerto Real, 11510 Cádiz, Spain.

\* Correspondence: [josemanuel.botubol@uca.es](mailto:josemanuel.botubol@uca.es) (J.M.B.-A.); [rosa.duran@uca.es](mailto:rosa.duran@uca.es) (R.D.-P.)

## Table of contents

|                                                                                                         |        |
|---------------------------------------------------------------------------------------------------------|--------|
| <b>Figure S1.</b> $^1\text{H}$ NMR spectrum (400 MHz) of compound <b>3</b> in $\text{CDCl}_3$ .....     | S4     |
| <b>Figure S2.</b> $^{13}\text{C}$ NMR spectrum (100 MHz) of compound <b>3</b> in $\text{CDCl}_3$ .....  | S5     |
| <b>Figure S3.</b> gCOSY spectrum of compound <b>3</b> .....                                             | S6     |
| <b>Figure S4.</b> gHSQC spectrum of compound <b>3</b> .....                                             | S7     |
| <b>Figure S5.</b> gHMBC spectrum of compound <b>3</b> .....                                             | S8     |
| <b>Figure S6.</b> 2D NOESY spectrum of compound <b>3</b> .....                                          | S9     |
| <b>Figures S7a-d.</b> 1D NOESY spectra of compound <b>3</b> .....                                       | S10-13 |
| <b>Figure S8.</b> HRMS of compound <b>3</b> .....                                                       | S14    |
| <b>Figure S9.</b> ECD spectrum of compound <b>3</b> .....                                               | S15    |
| <b>Figure S10.</b> $^1\text{H}$ NMR spectrum (400 MHz) of compound <b>4</b> in $\text{CDCl}_3$ .....    | S16    |
| <b>Figure S11.</b> $^{13}\text{C}$ NMR spectrum (100 MHz) of compound <b>4</b> in $\text{CDCl}_3$ ..... | S17    |
| <b>Figure S12.</b> gCOSY spectrum of compound <b>4</b> .....                                            | S18    |
| <b>Figure S13.</b> gHSQC spectrum of compound <b>4</b> .....                                            | S19    |
| <b>Figure S14.</b> gHMBC spectrum of compound <b>4</b> .....                                            | S20    |
| <b>Figures S15a-d.</b> 1D NOESY spectra of compound <b>4</b> .....                                      | S21-24 |
| <b>Figure S16.</b> HRMS of compound <b>4</b> .....                                                      | S25    |
| <b>Figure S17.</b> ECD spectrum of compound <b>4</b> .....                                              | S26    |
| <b>Figure S18.</b> $^1\text{H}$ NMR spectrum (400 MHz) of compound <b>5</b> in $\text{CDCl}_3$ .....    | S27    |
| <b>Figure S19.</b> $^{13}\text{C}$ NMR spectrum (100 MHz) of compound <b>5</b> in $\text{CDCl}_3$ ..... | S28    |
| <b>Figure S20.</b> gCOSY spectrum of compound <b>5</b> .....                                            | S29    |
| <b>Figure S21.</b> gHSQC spectrum of compound <b>5</b> .....                                            | S30    |
| <b>Figure S22.</b> gHMBC spectrum of compound <b>5</b> .....                                            | S31    |
| <b>Figure S23.</b> 2D NOESY spectrum of compound <b>5</b> .....                                         | S32    |
| <b>Figures S24a-e.</b> 1D NOESY spectra of compound <b>5</b> .....                                      | S33-37 |
| <b>Figure S25.</b> HRMS of compound <b>5</b> .....                                                      | S38    |
| <b>Figure S26.</b> ECD spectrum of compound <b>5</b> .....                                              | S39    |
| <b>Figure S27.</b> $^1\text{H}$ NMR spectrum (400 MHz) of compound <b>6</b> in $\text{CDCl}_3$ .....    | S40    |
| <b>Figure S28.</b> $^{13}\text{C}$ NMR spectrum (100 MHz) of compound <b>6</b> in $\text{CDCl}_3$ ..... | S41    |
| <b>Figure S29.</b> gCOSY spectrum of compound <b>6</b> .....                                            | S42    |
| <b>Figure S30.</b> gHSQC spectrum of compound <b>6</b> .....                                            | S43    |

|                                                                                                           |        |
|-----------------------------------------------------------------------------------------------------------|--------|
| <b>Figure S31.</b> gHMBC spectrum of compound <b>6</b> .....                                              | S44    |
| <b>Figure S32.</b> 2D NOESY spectrum of compound <b>6</b> .....                                           | S45    |
| <b>Figures S33a-h.</b> 1D NOESY spectra of compound <b>6</b> .....                                        | S46-53 |
| <b>Figure S34.</b> HRMS of compound <b>6</b> .....                                                        | S54    |
| <b>Figure S35.</b> ECD spectrum of compound <b>6</b> .....                                                | S55    |
| <b>Figure S36.</b> <sup>1</sup> H NMR spectrum (400 MHz) of compound <b>7</b> in CDCl <sub>3</sub> .....  | S56    |
| <b>Figure S37.</b> <sup>13</sup> C NMR spectrum (100 MHz) of compound <b>7</b> in CDCl <sub>3</sub> ..... | S57    |
| <b>Figure S38.</b> gCOSY spectrum of compound <b>7</b> .....                                              | S58    |
| <b>Figure S39.</b> gHSQC spectrum of compound <b>7</b> .....                                              | S59    |
| <b>Figure S40.</b> gHMBC spectrum of compound <b>7</b> .....                                              | S60    |
| <b>Figure S41.</b> 2D NOESY spectrum of compound <b>7</b> .....                                           | S61    |
| <b>Figures S42a-h.</b> 1D NOESY spectra of compound <b>7</b> .....                                        | S62-69 |
| <b>Figure S43.</b> HRMS of compound <b>7</b> .....                                                        | S70    |
| <b>Figure S44.</b> ECD spectrum of compound <b>7</b> .....                                                | S71    |

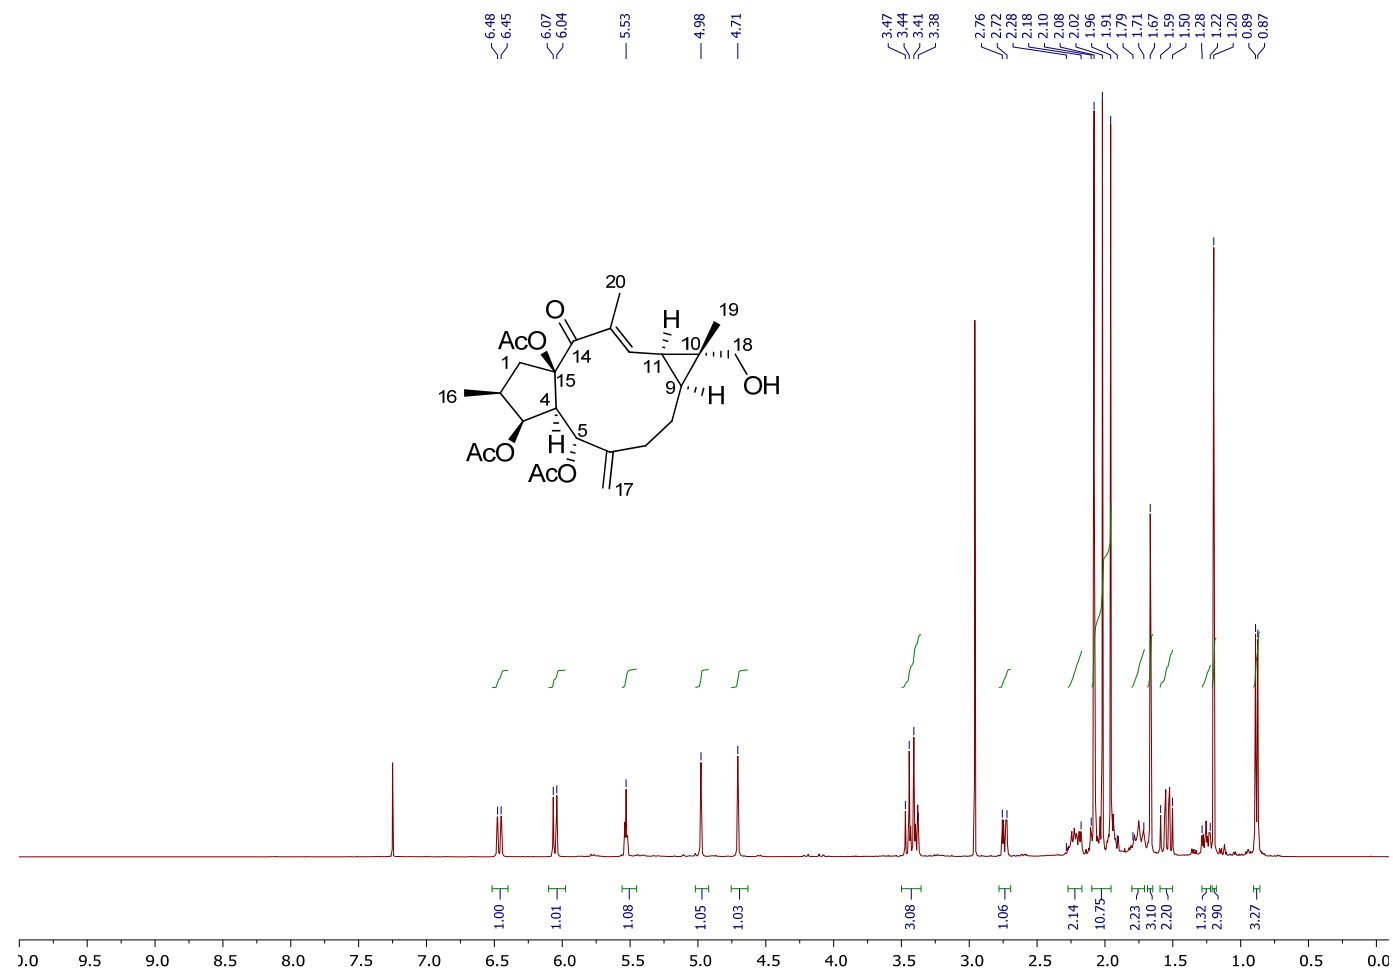

**Figure S1.**  $^1\text{H}$  NMR spectrum (400 MHz) of compound **3** in  $\text{CDCl}_3$ .

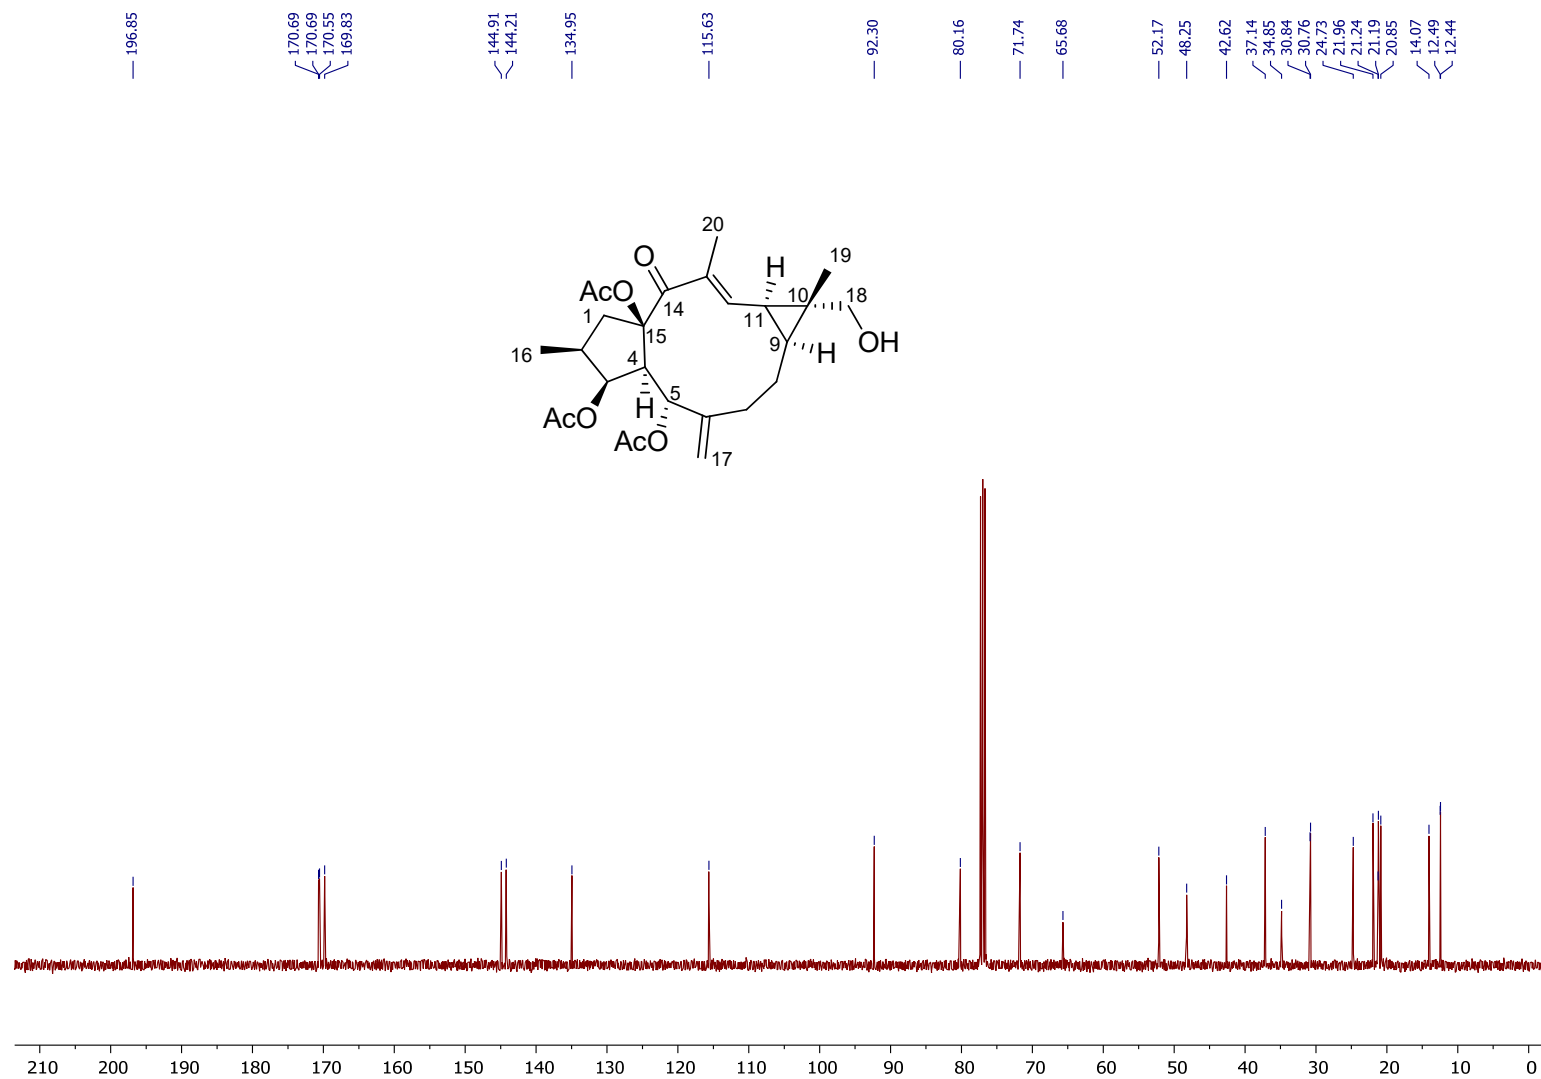

**Figure S2.** <sup>13</sup>C NMR spectrum (100 MHz) of compound **3** in CDCl<sub>3</sub>.

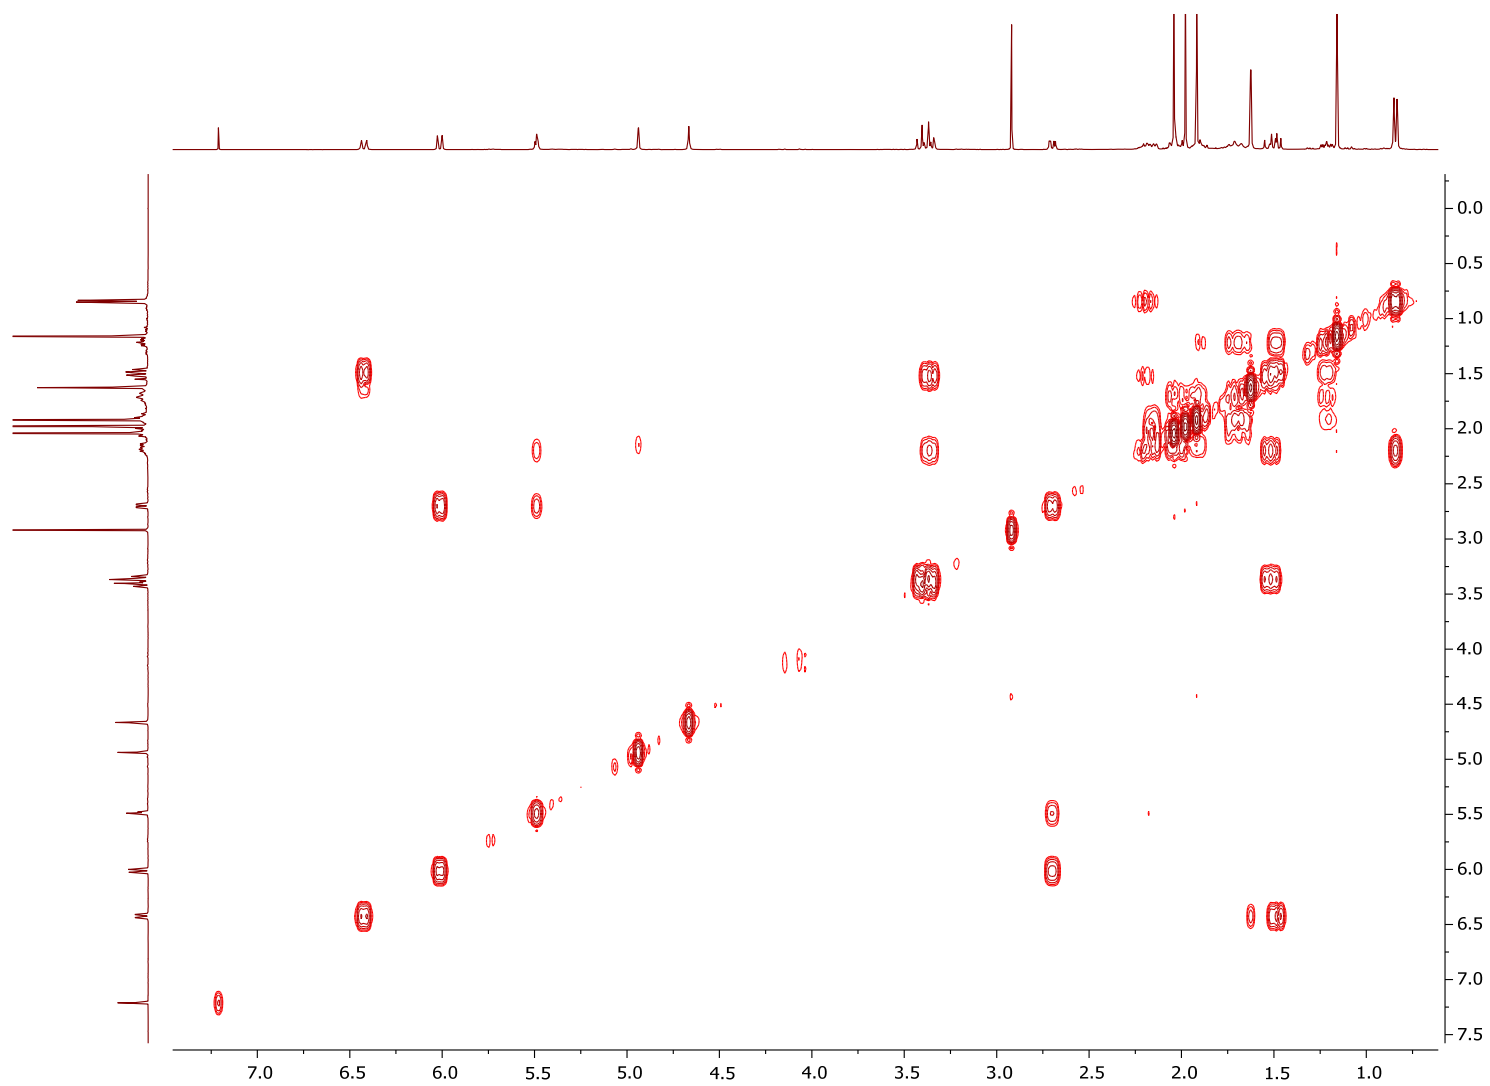

**Figure S3.** gCOSY spectrum of compound **3**.

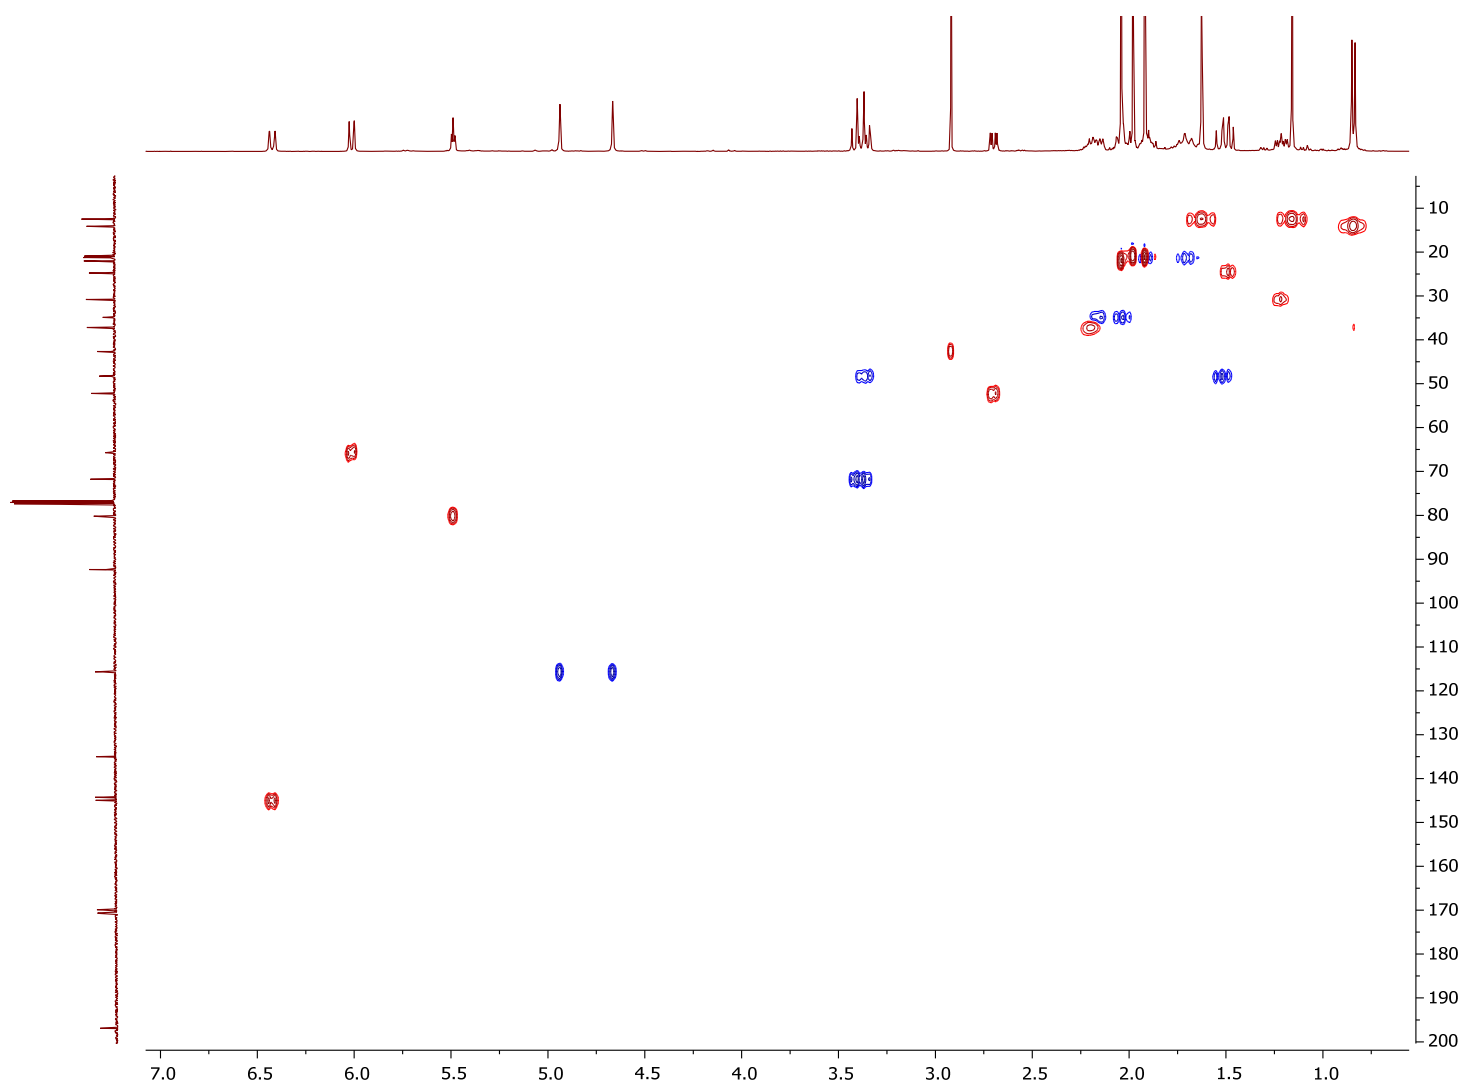

**Figure S4.** gHSQC spectrum of compound **3**.

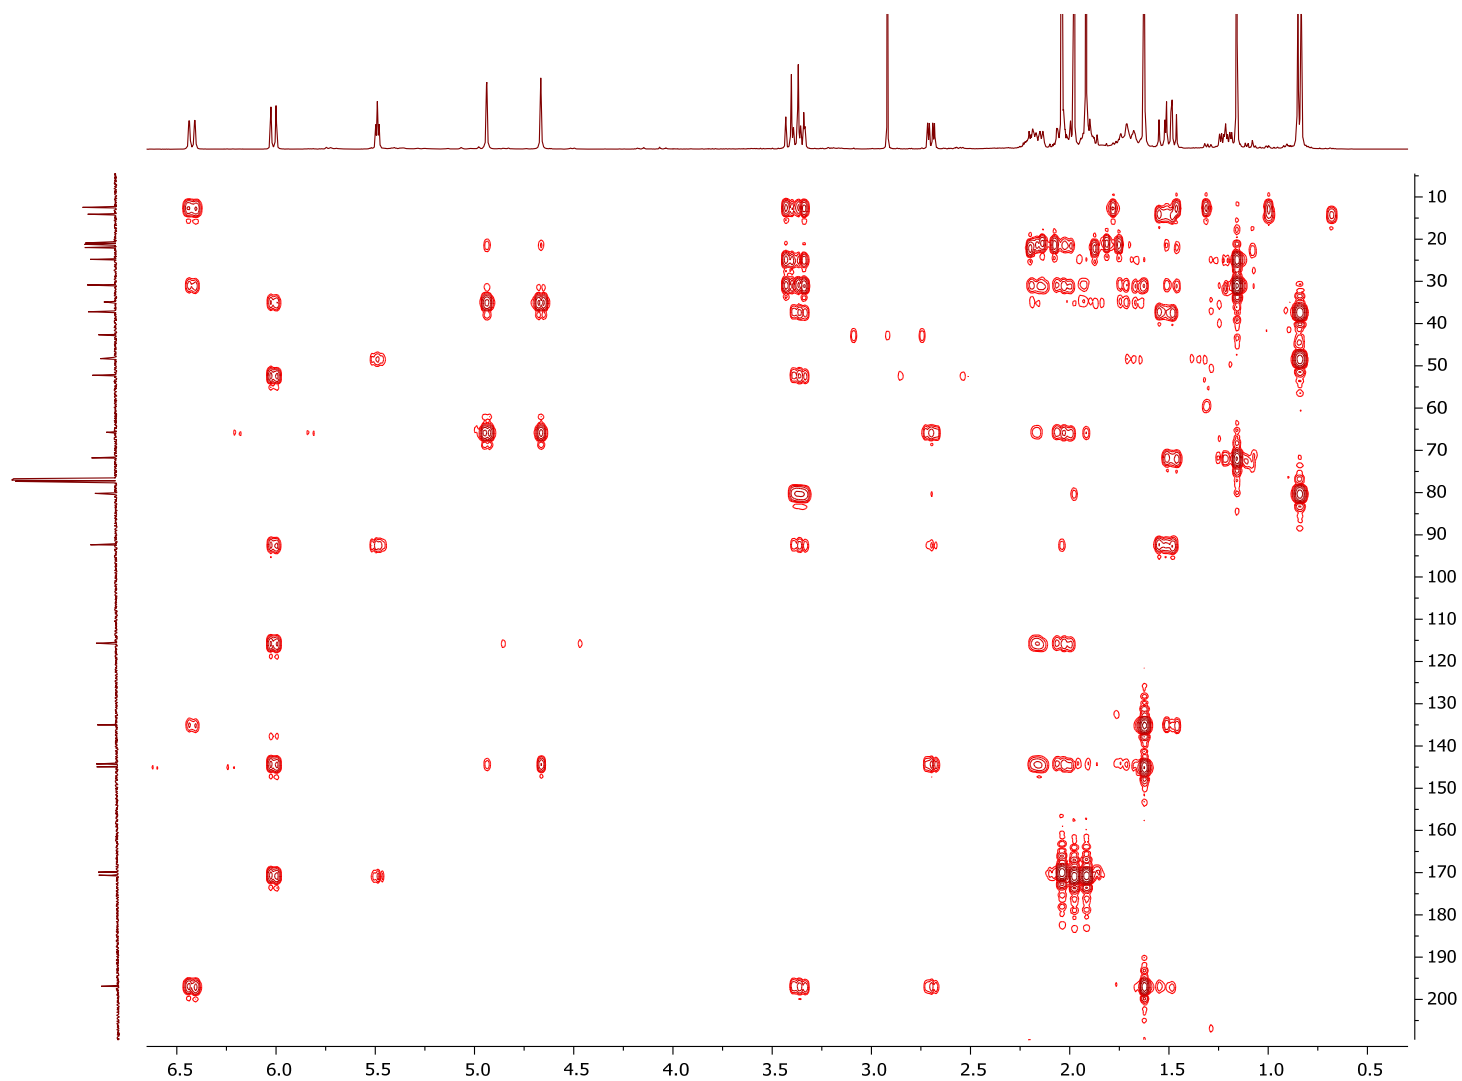

**Figure S5.** gHMBC spectrum of compound **3**.



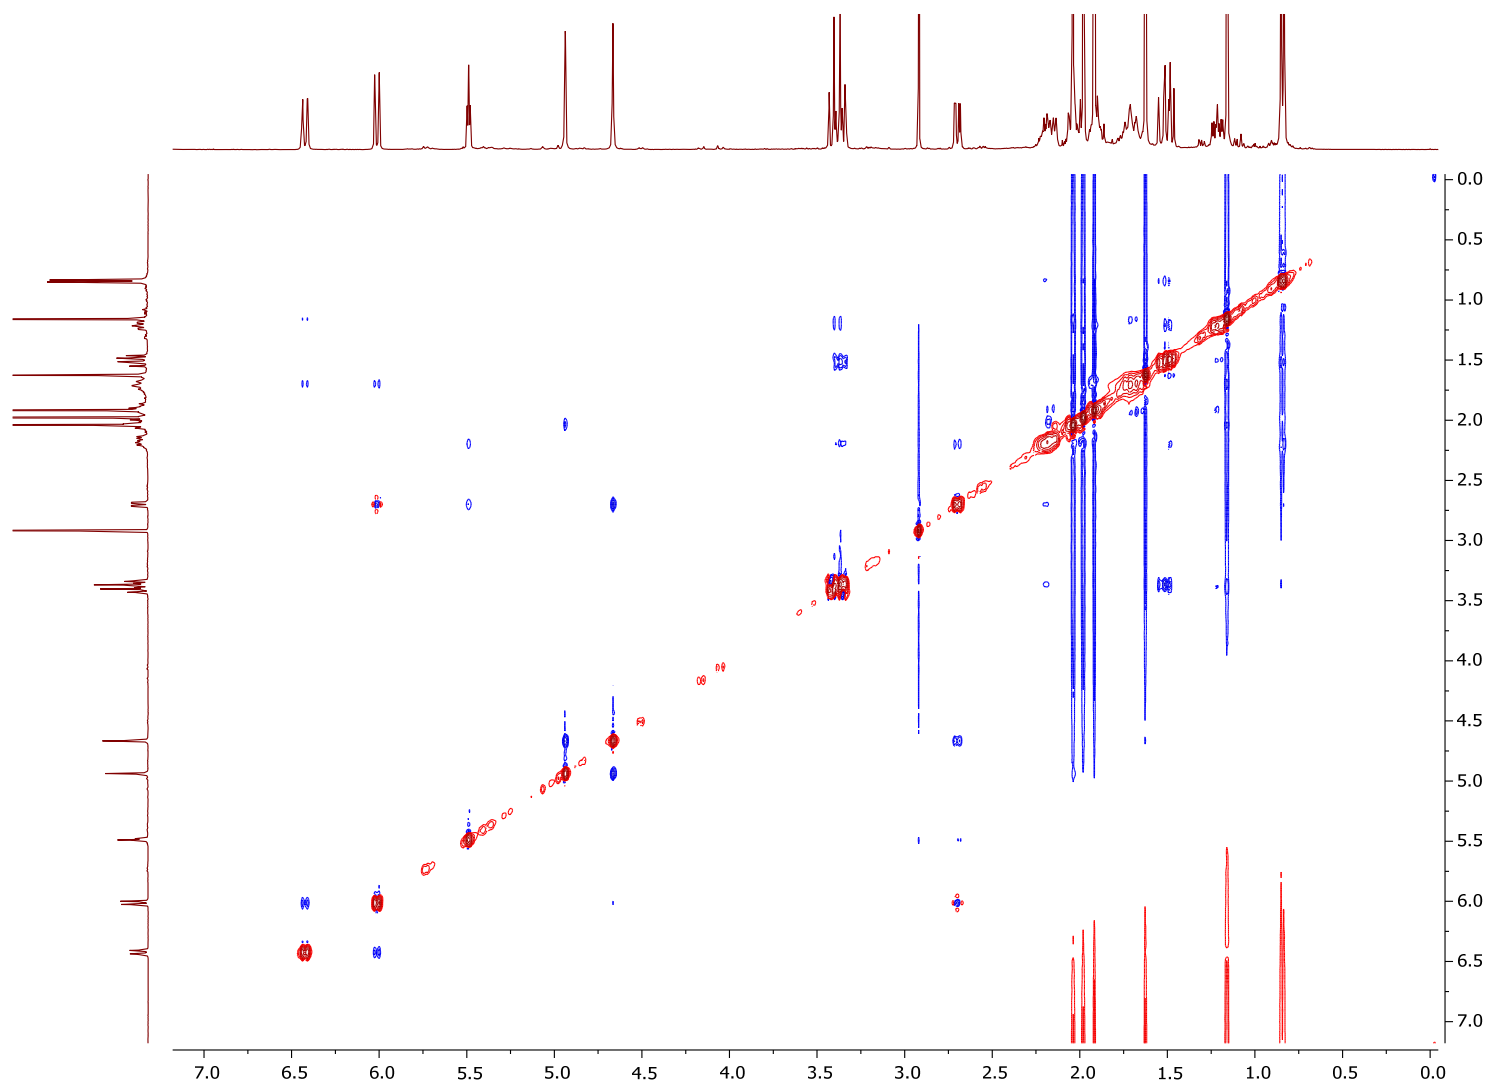

**Figure S6.** 2D NOESY spectrum of compound **3**.

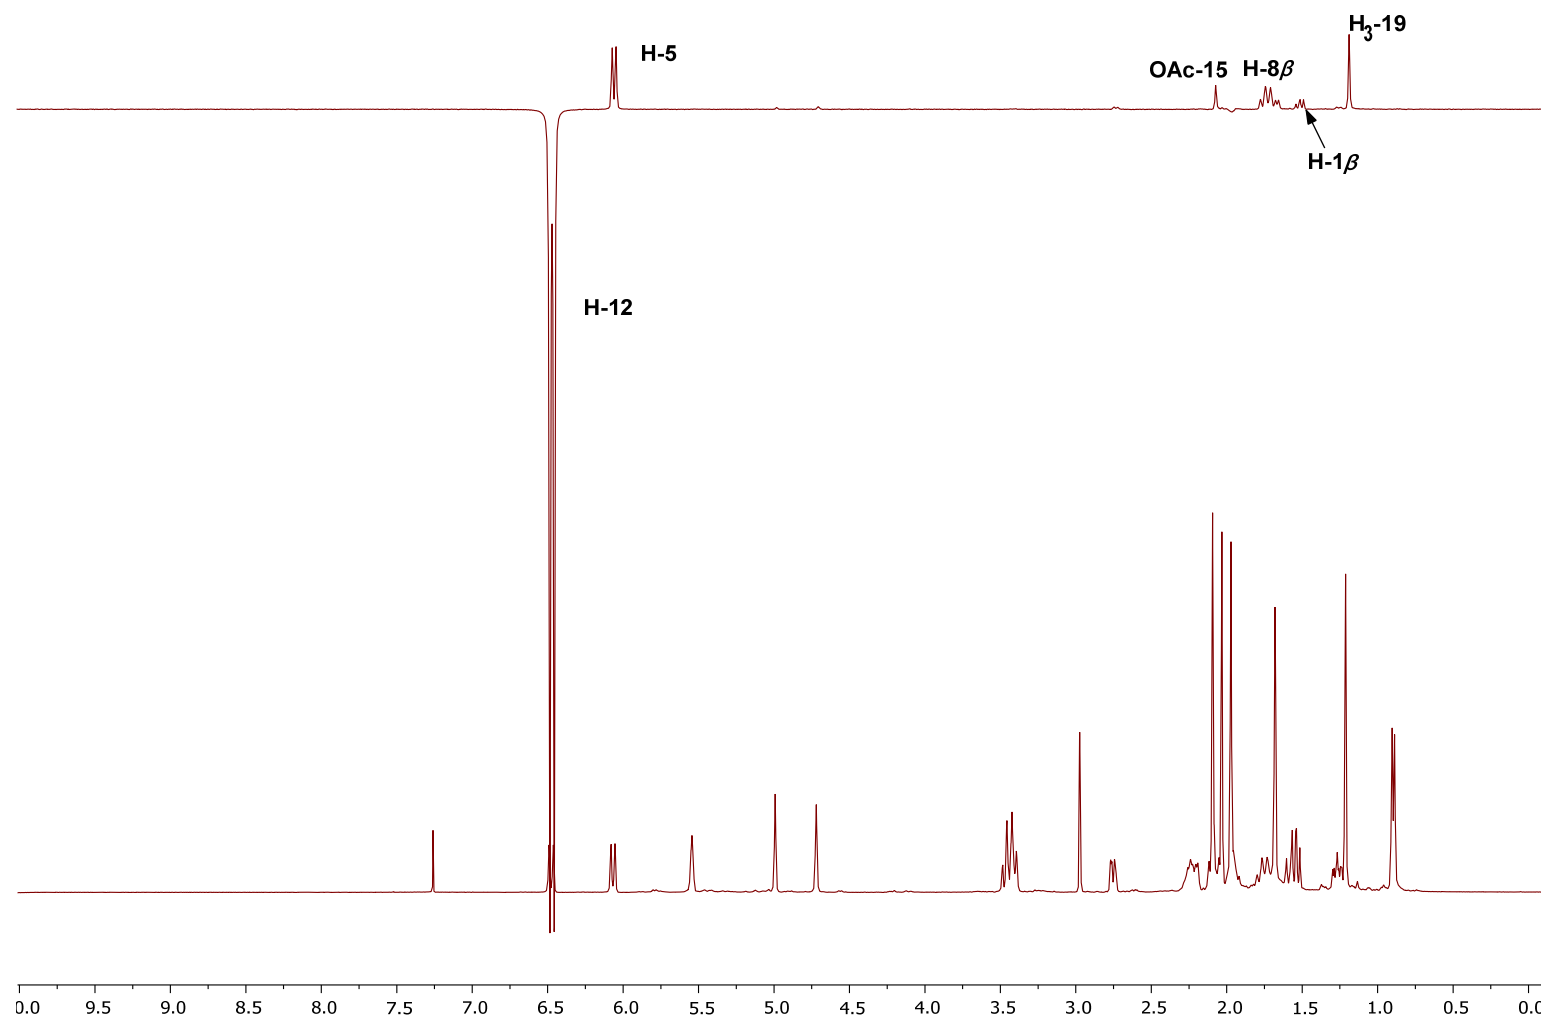

**Figure S7a.** 1D NOESY spectrum of compound **3**.

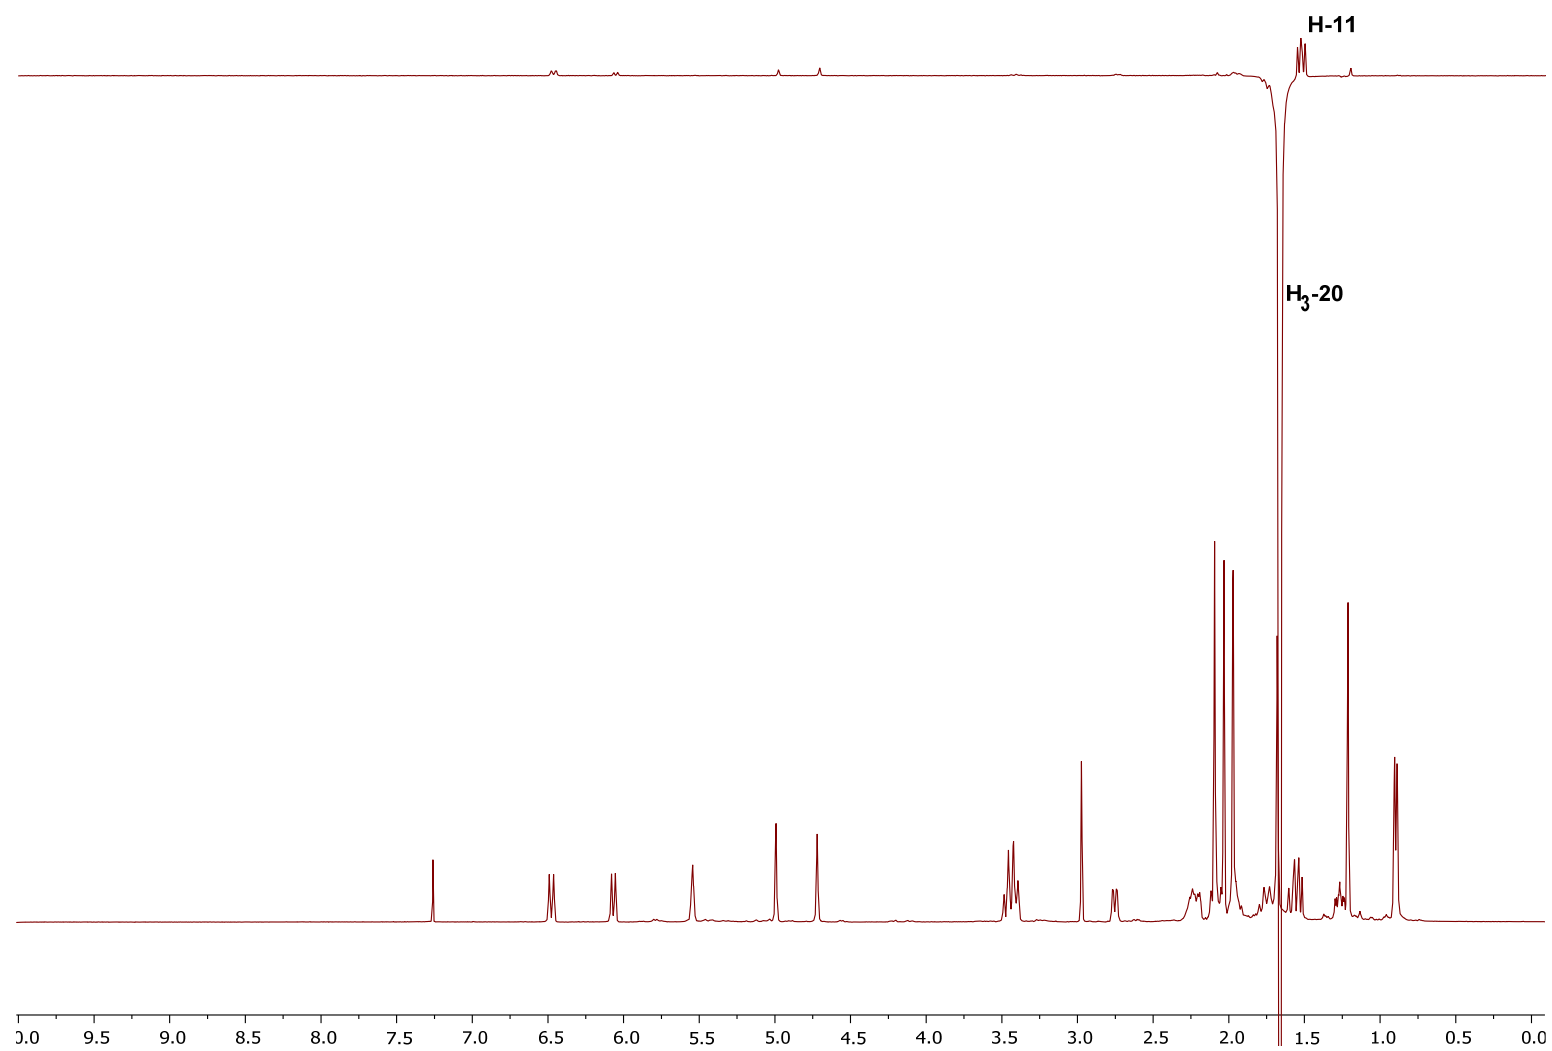

**Figure S7b.** 1D NOESY spectrum of compound **3**.

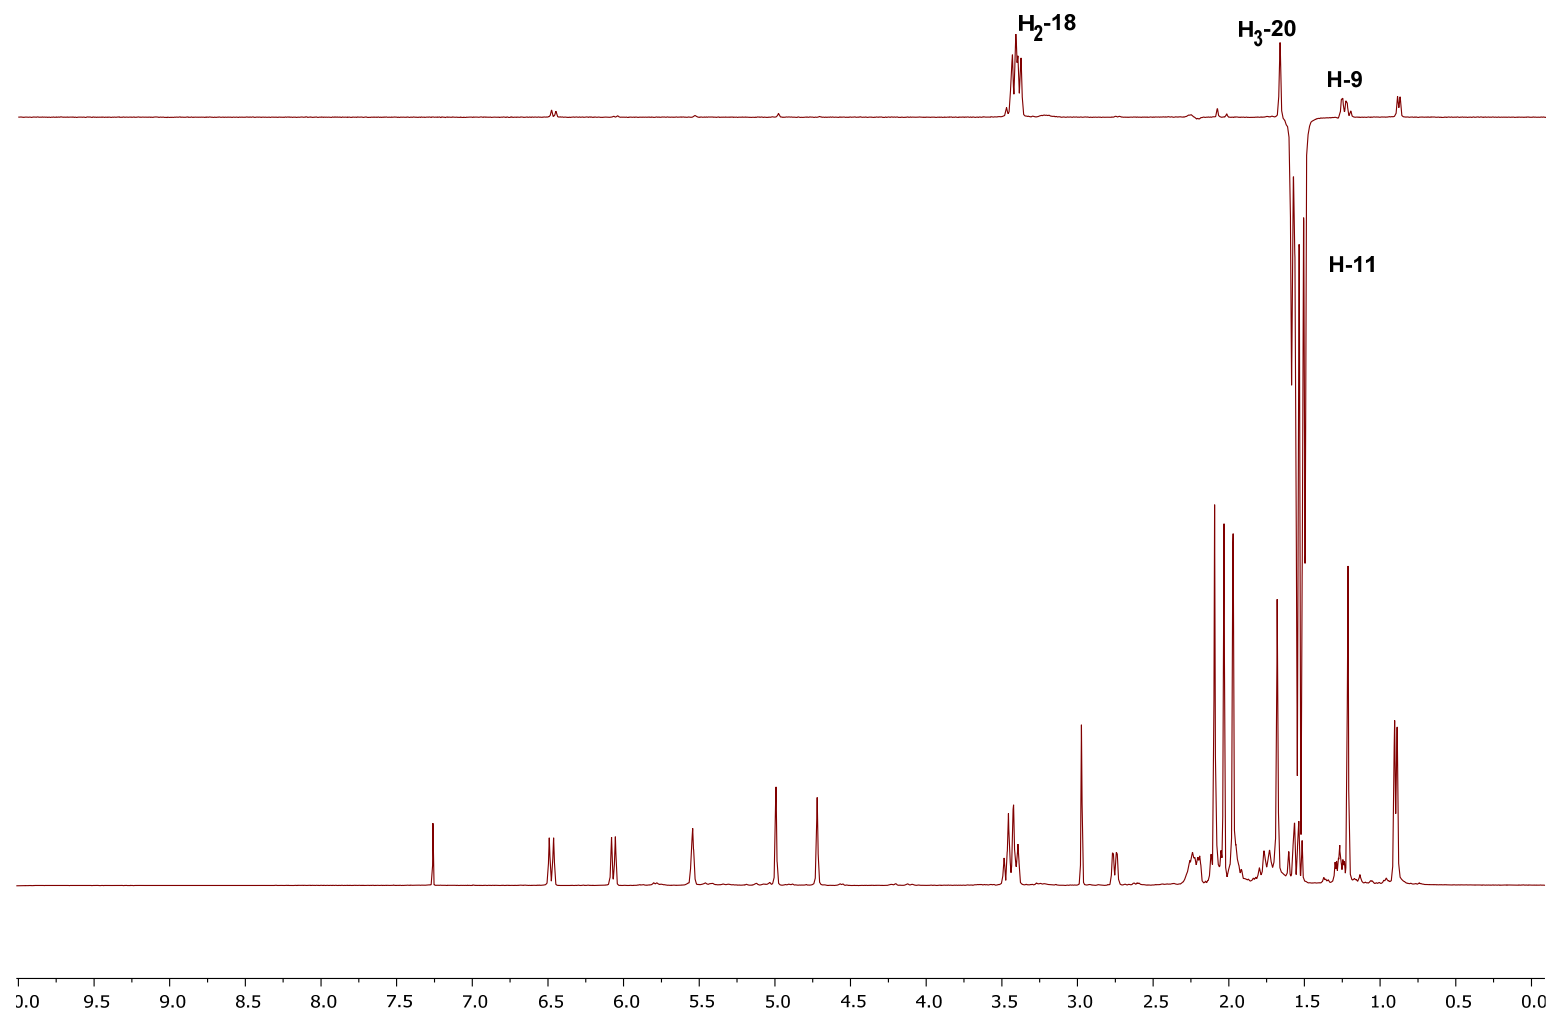

**Figure S7c.** 1D NOESY spectrum of compound **3**.

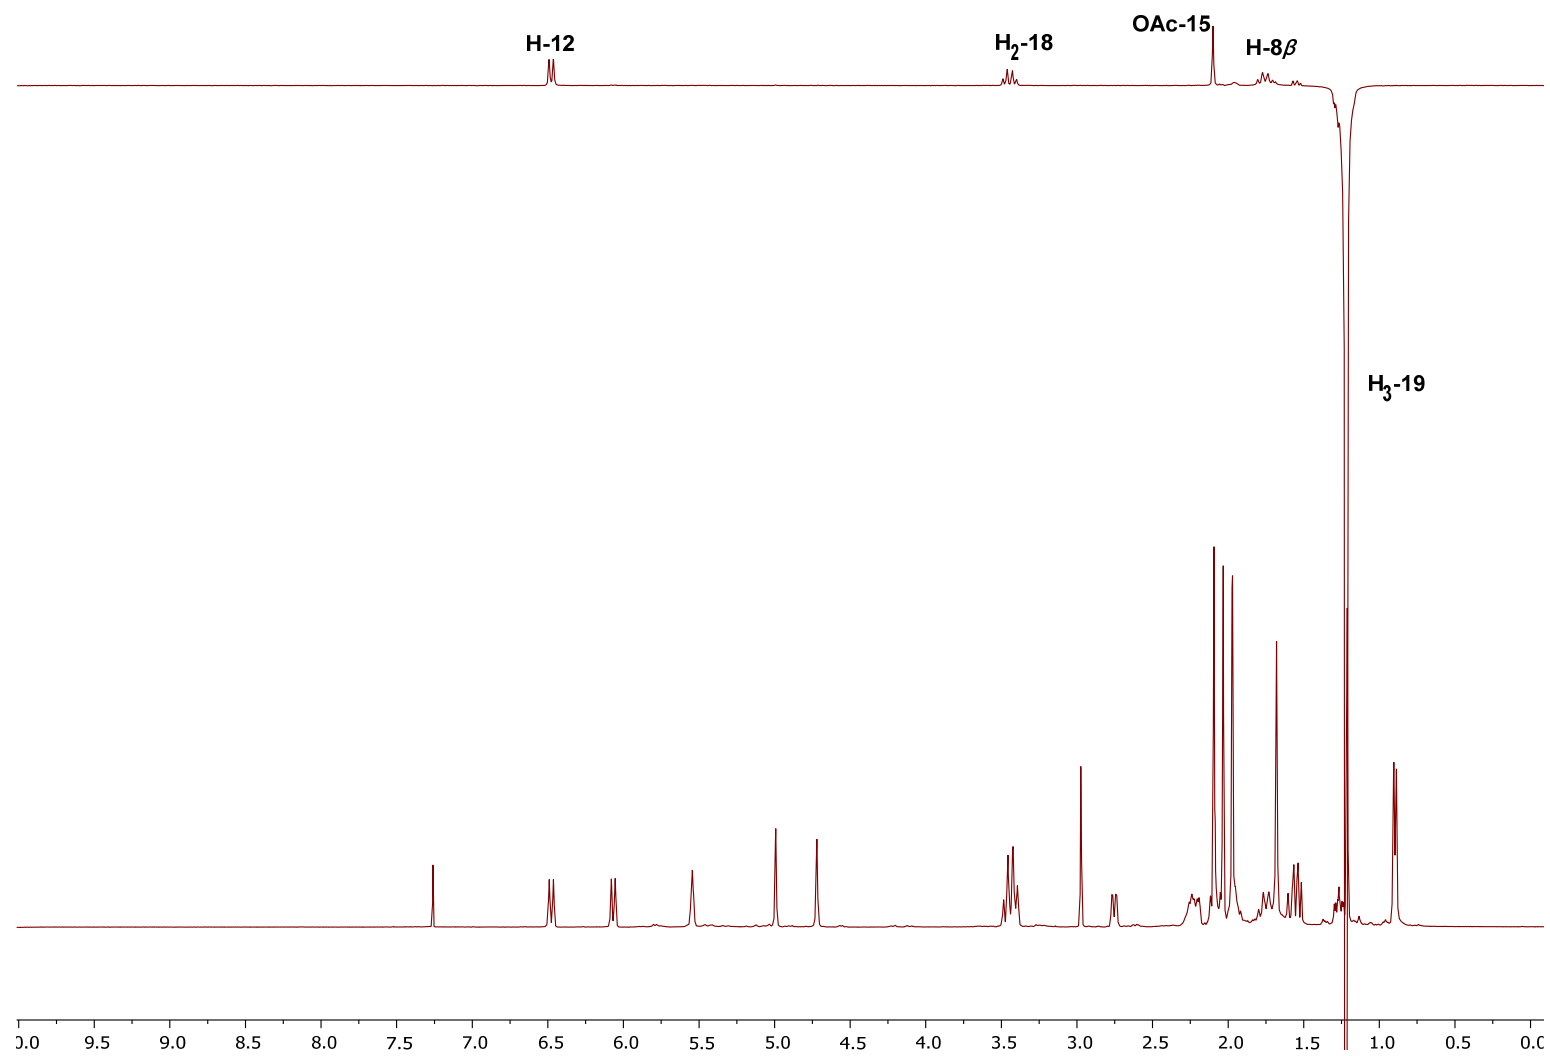

**Figure S7d.** 1D NOESY spectrum of compound **3**.

## Elemental Composition Report

Page 1

### Single Mass Analysis

Tolerance = 5.0 mDa / DBE: min = -1.5, max = 80.0

Element prediction: Off

Number of isotope peaks used for i-FIT = 5

Monoisotopic Mass, Even Electron Ions

87 formula(e) evaluated with 3 results within limits (all results (up to 1000) for each mass)

Elements Used:

C: 0-30 H: 0-50 O: 0-15 <sup>23</sup>Na: 0-1

243\_953\_Strep-EB-12-MSe3pos 65 (1.215)

1: TOF MS ES+  
3.53e+006

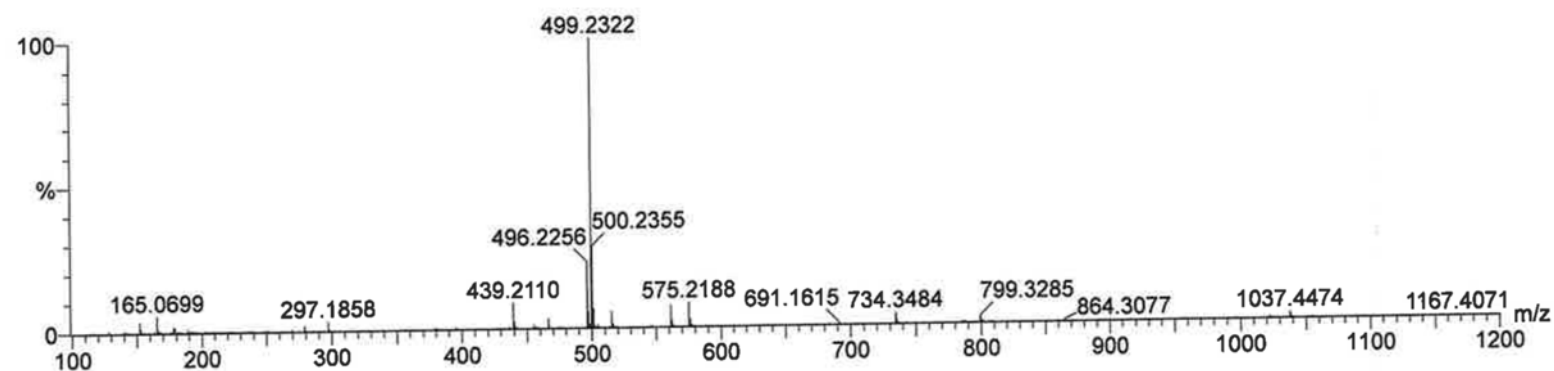

Minimum: -1.5  
Maximum: 5.0 10.0 80.0

| Mass     | Calc. Mass | mDa  | PPM  | DBE  | i-FIT  | Norm  | Conf (%) | Formula                                                          |
|----------|------------|------|------|------|--------|-------|----------|------------------------------------------------------------------|
| 499.2322 | 499.2308   | 1.4  | 2.8  | 8.5  | 1690.9 | 0.198 | 82.03    | C <sub>26</sub> H <sub>36</sub> O <sub>8</sub> <sup>23</sup> Na  |
|          | 499.2332   | -1.0 | -2.0 | 11.5 | 1692.4 | 1.719 | 17.92    | C <sub>28</sub> H <sub>35</sub> O <sub>8</sub>                   |
|          | 499.2367   | -4.5 | -9.0 | -0.5 | 1698.2 | 7.489 | 0.06     | C <sub>19</sub> H <sub>40</sub> O <sub>13</sub> <sup>23</sup> Na |

Figure S8. HRMS of compound 3.

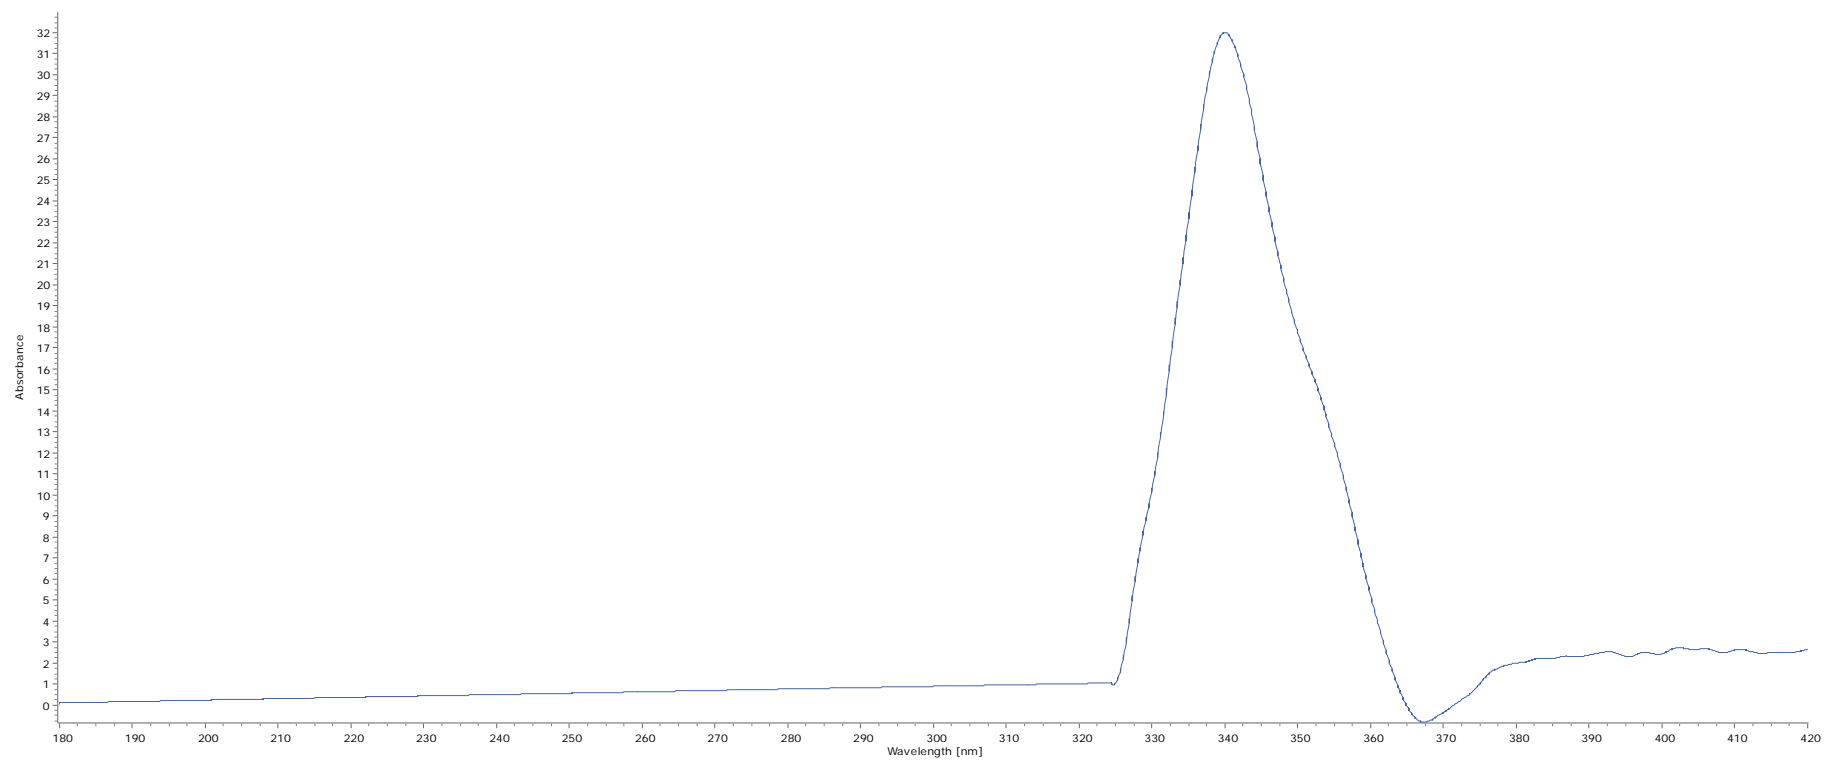

**Figure S9.** ECD of compound **3**.

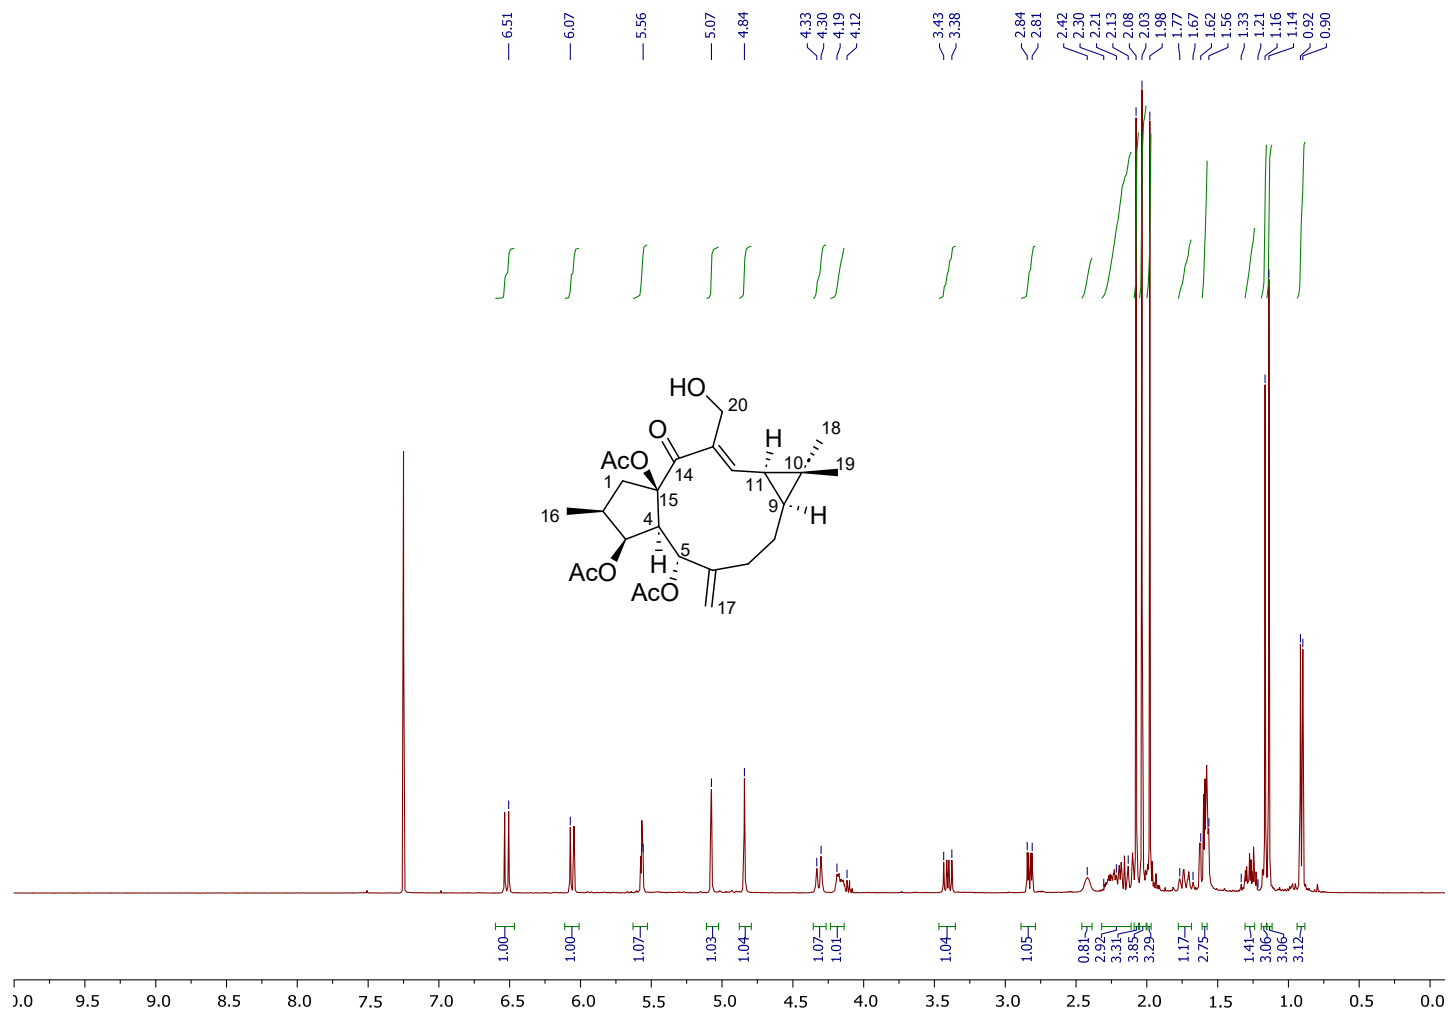

**Figure S10.**  $^1\text{H}$  NMR spectrum (400 MHz) of compound **4** in  $\text{CDCl}_3$ .



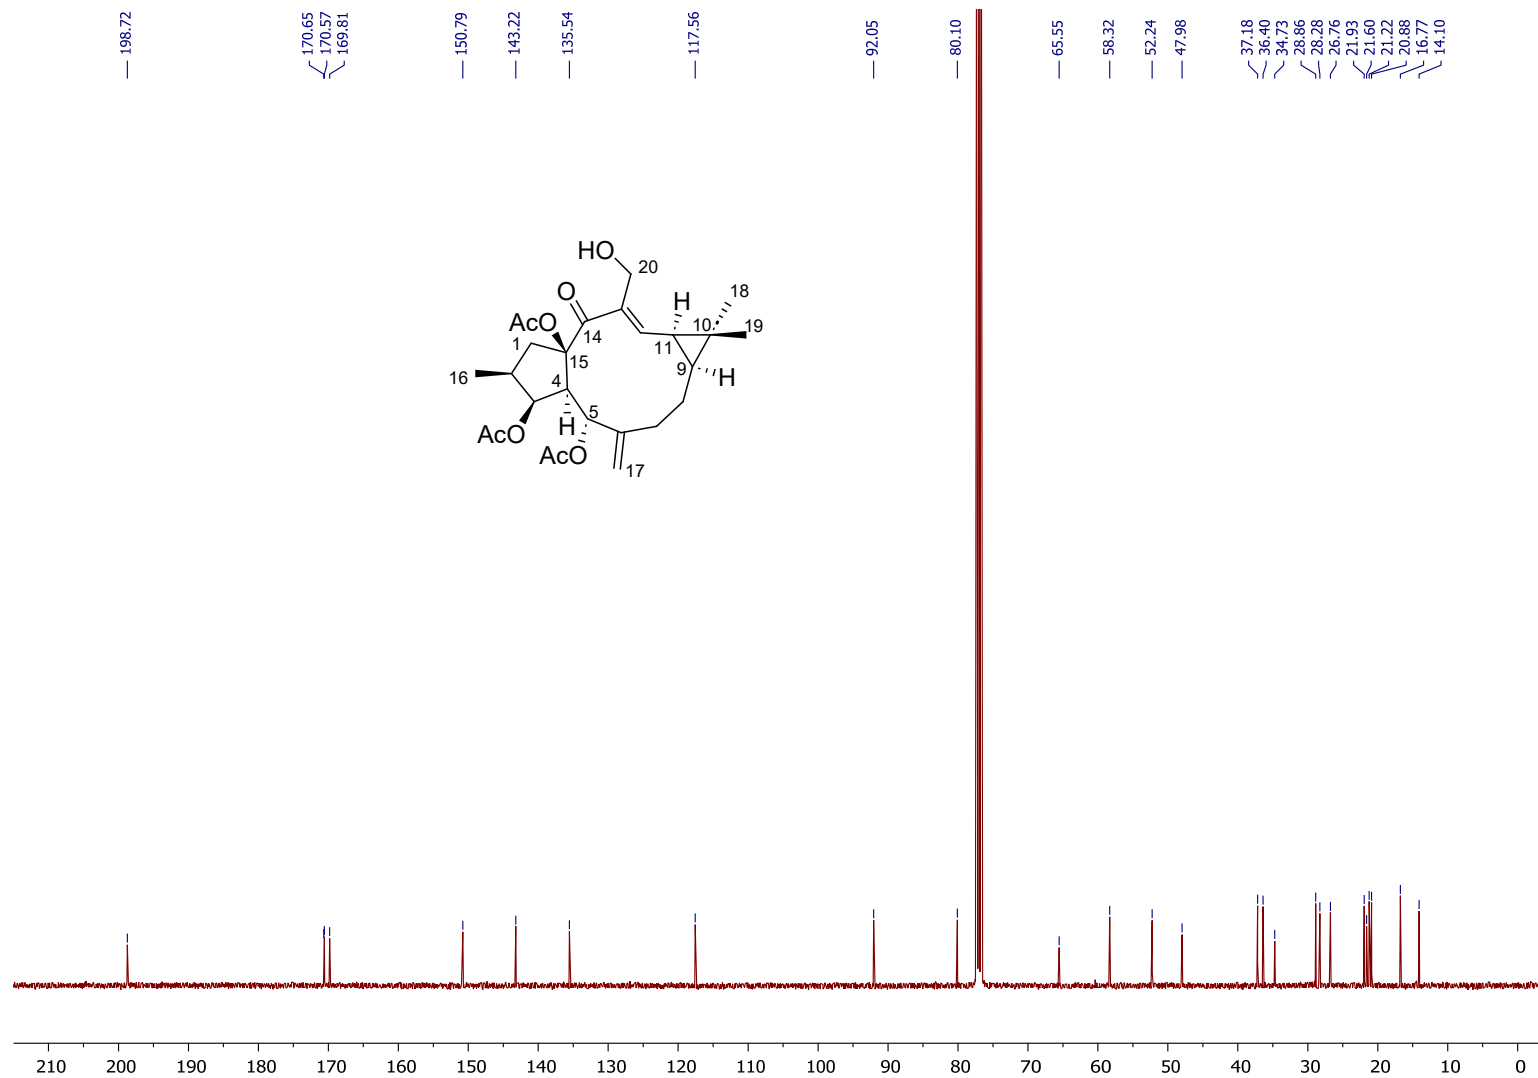

**Figure S11.** <sup>13</sup>C NMR spectrum (100 MHz) of compound 4 in CDCl<sub>3</sub>.

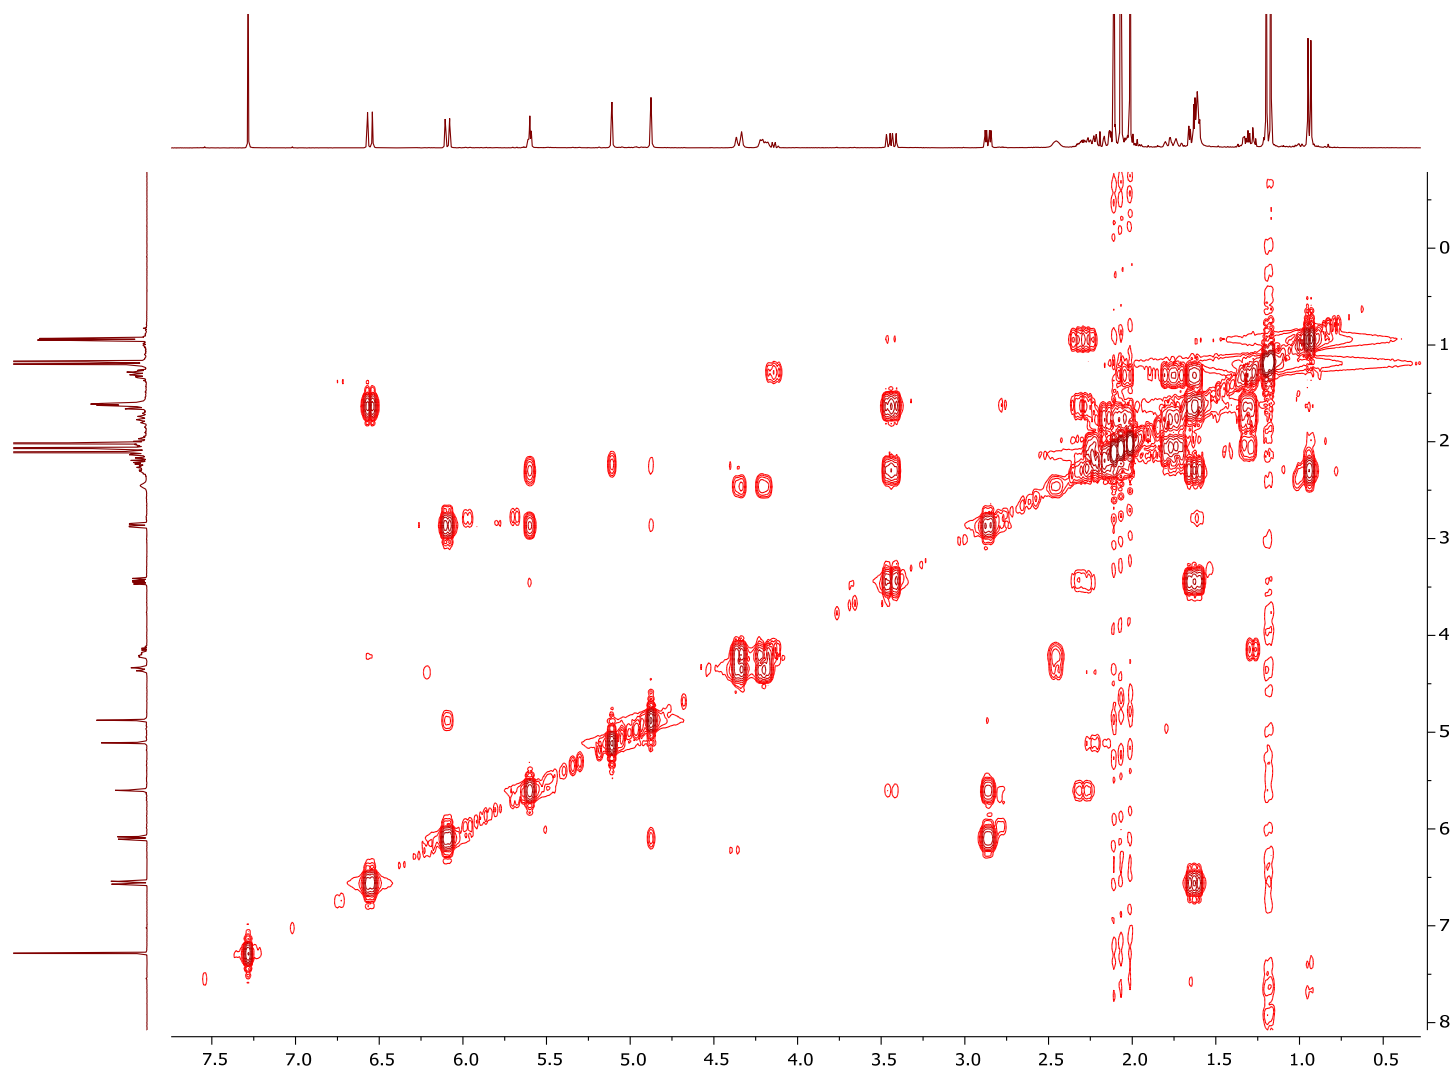

**Figure S12.** gCOSY spectrum of compound **4**.

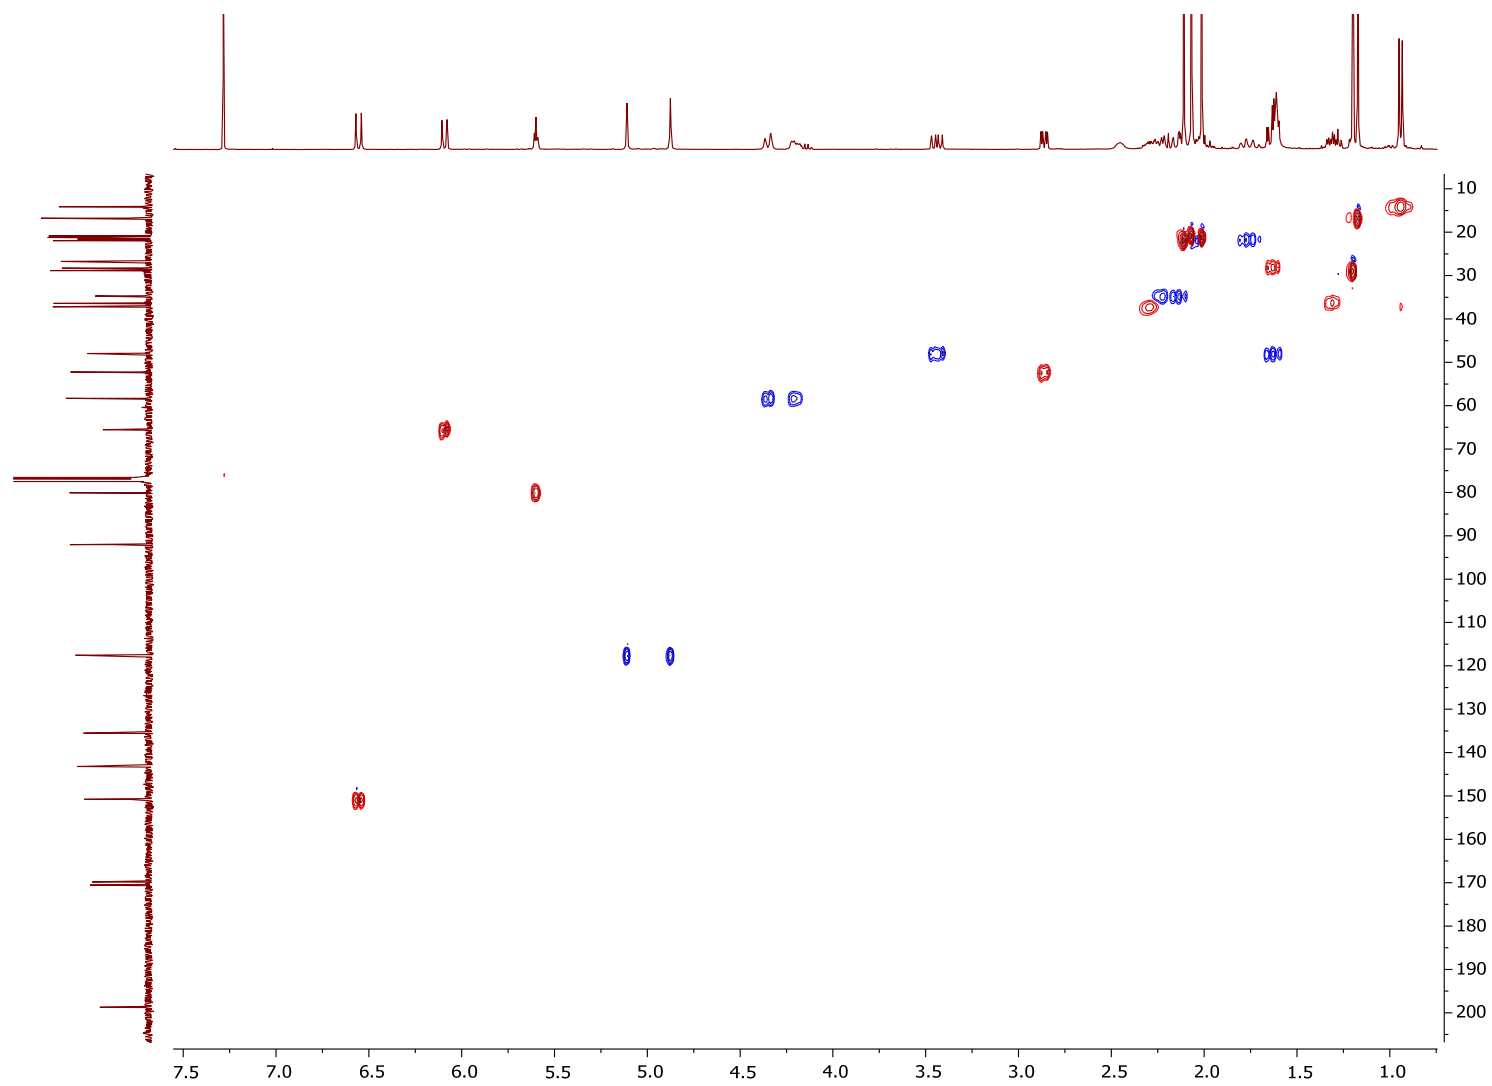

Figure S13. gHSQC spectrum of compound 4.

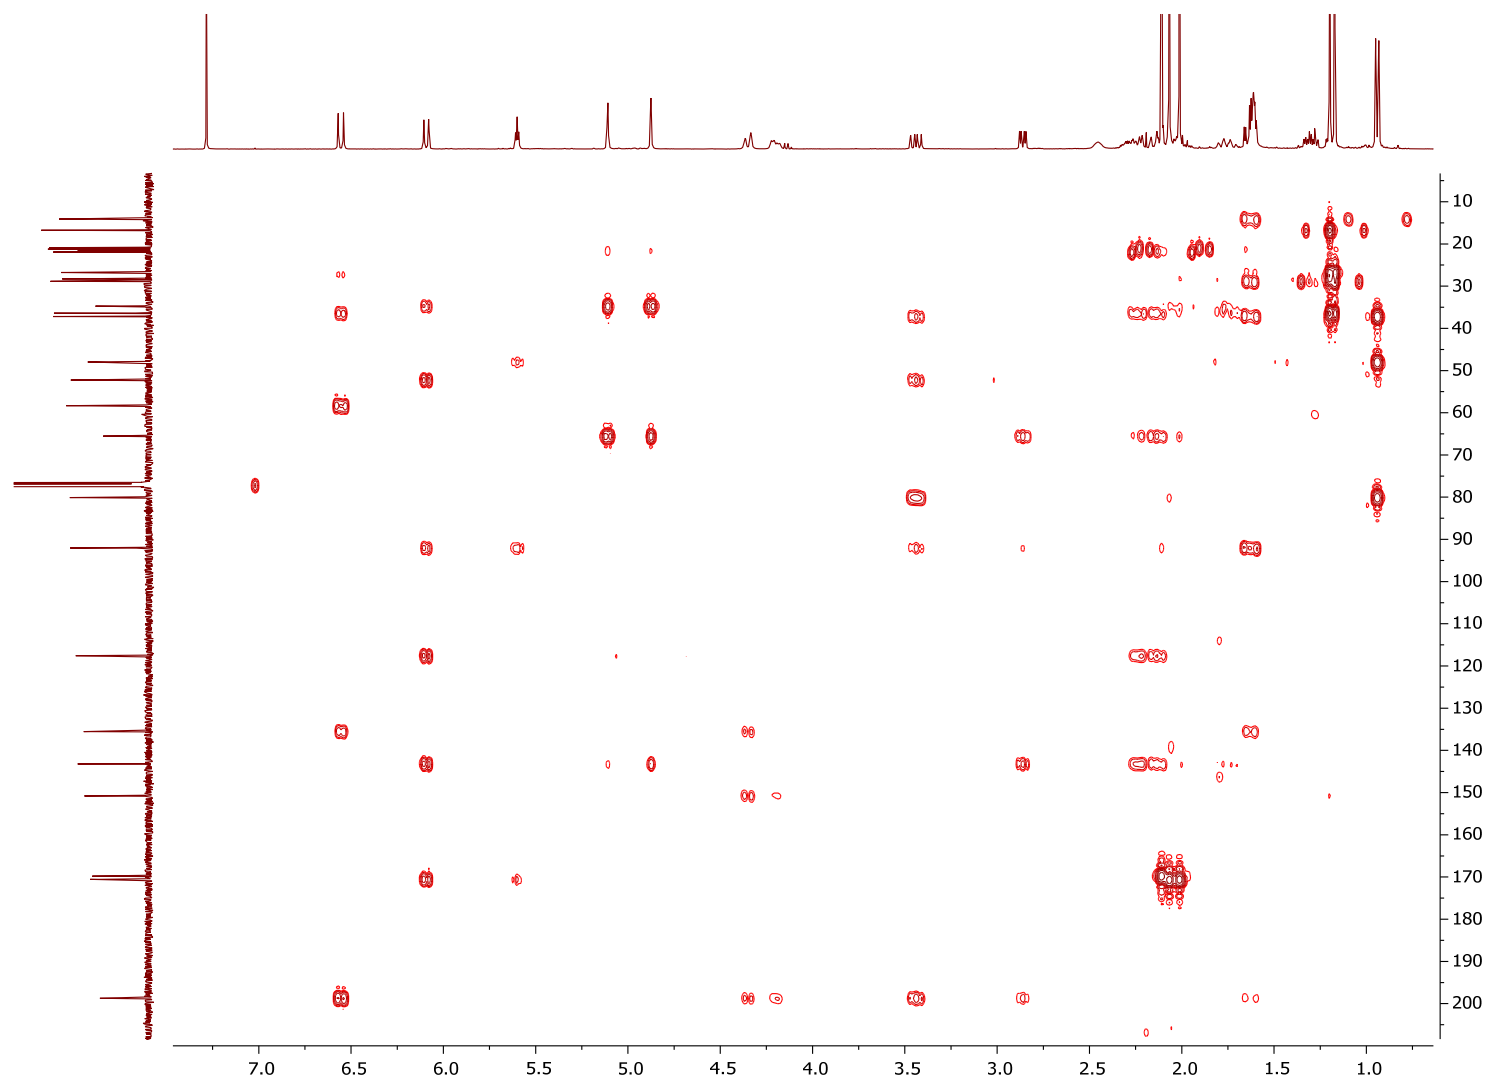

Figure S14. gHMBC spectrum of compound 4.

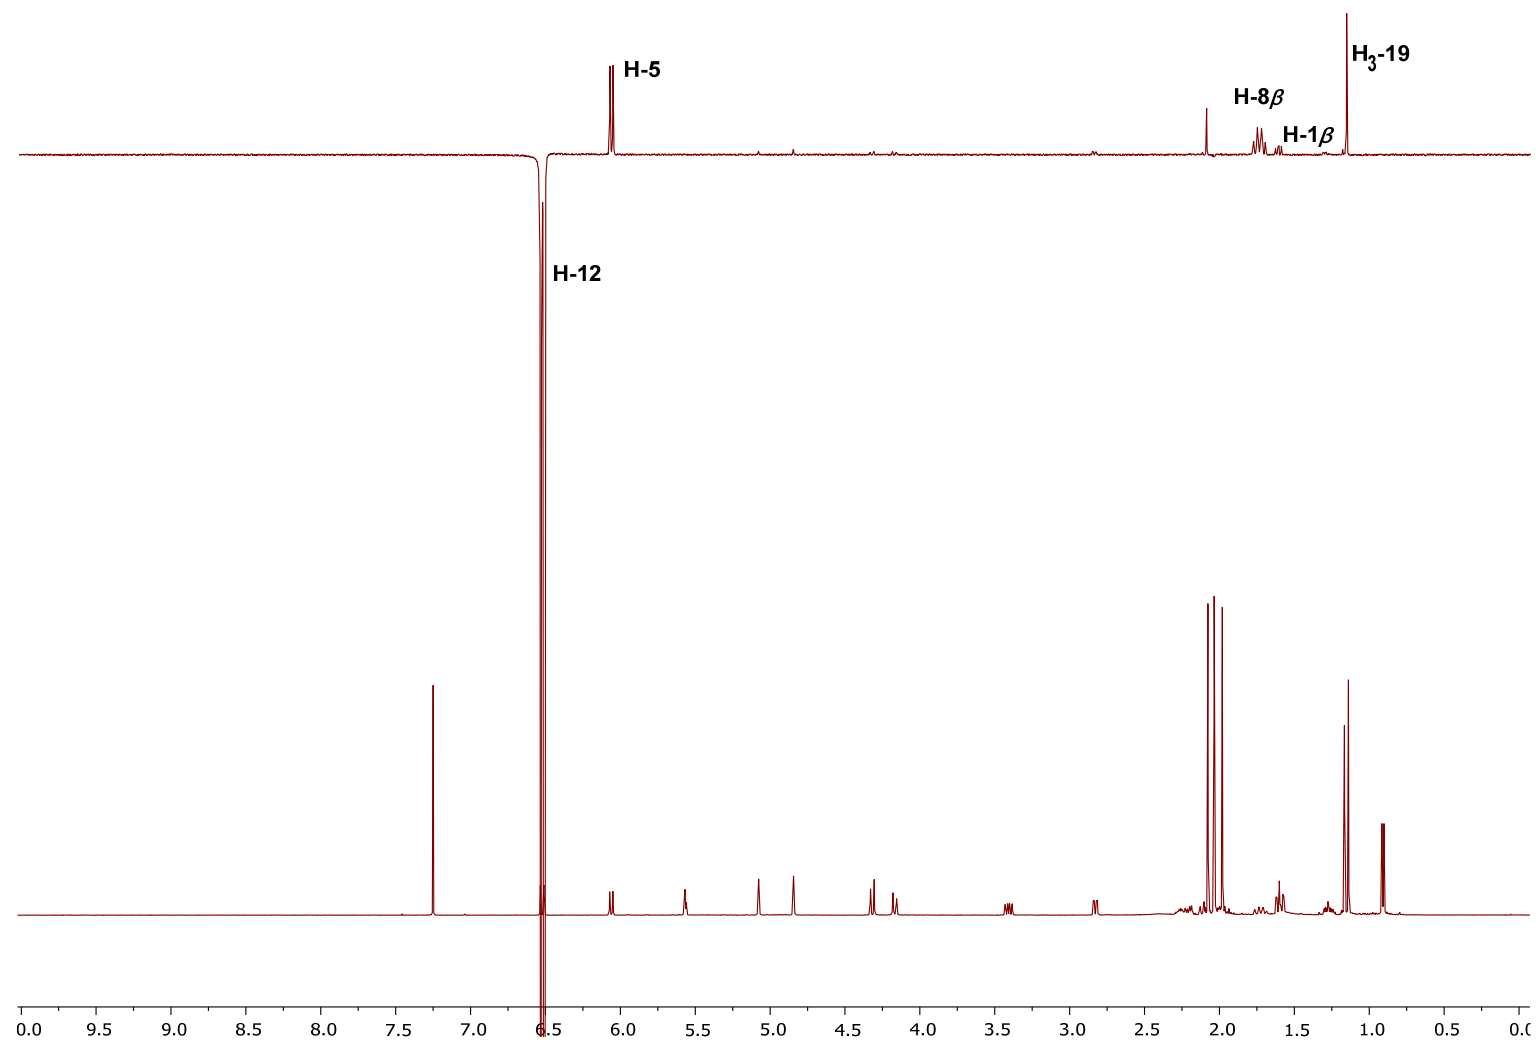

**Figure S15a.** 1D NOESY spectrum of compound **4**.

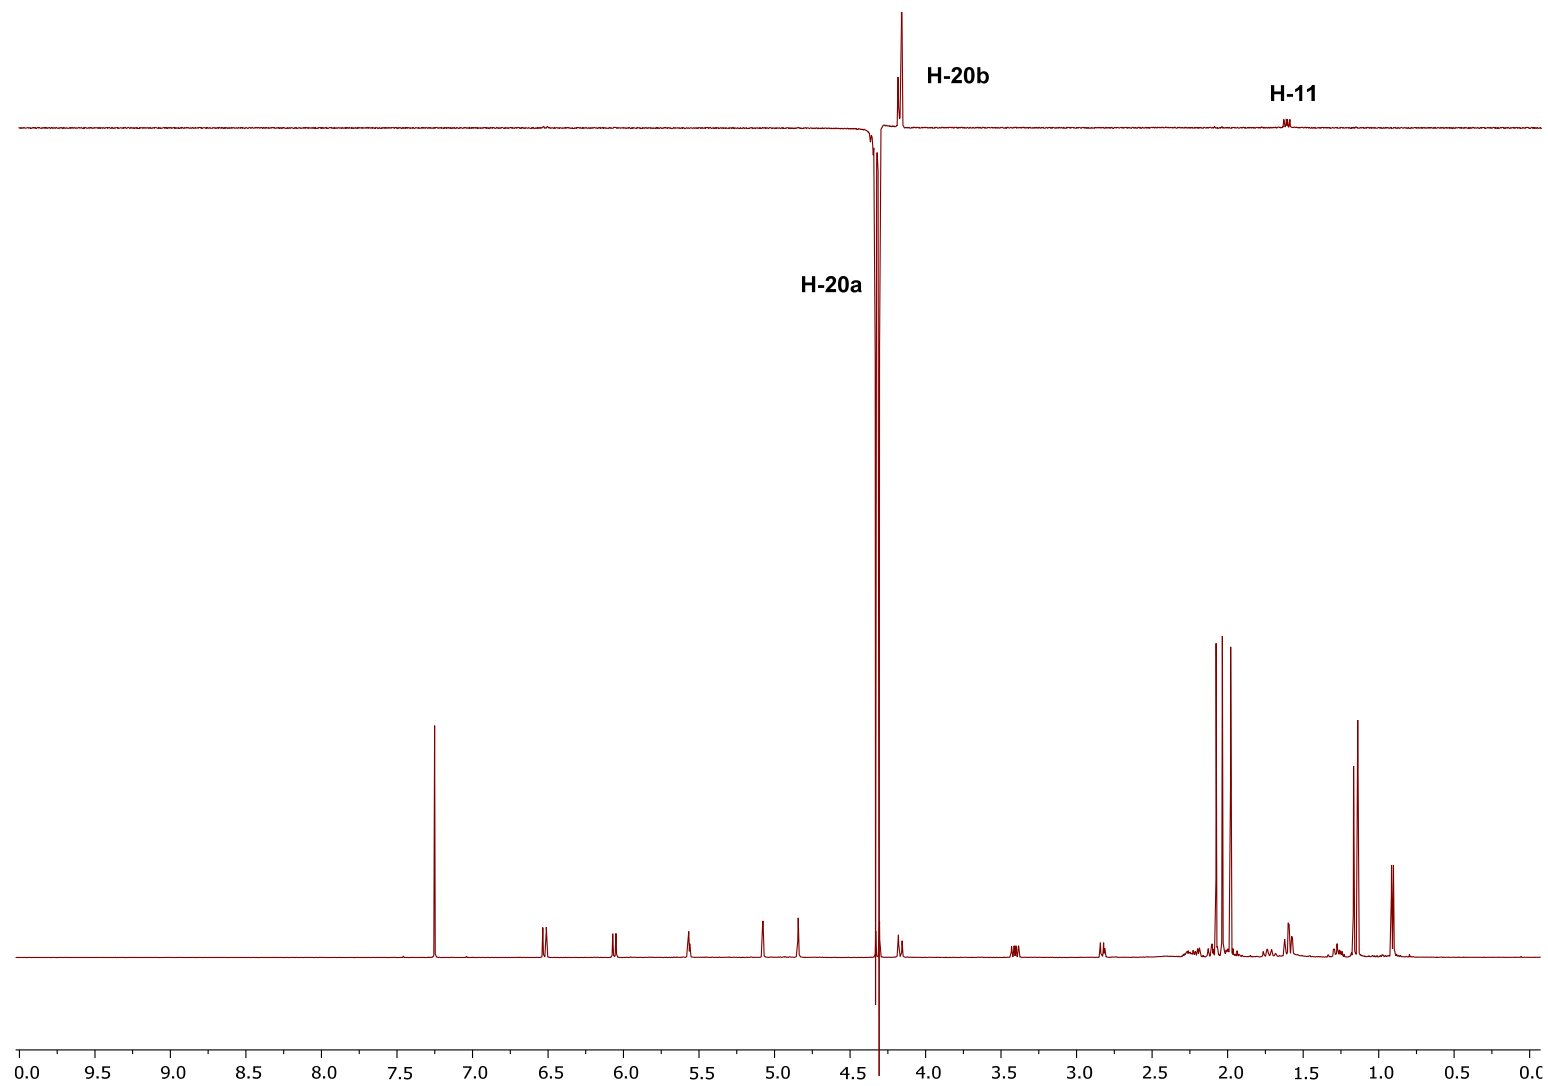

**Figure S15b.** 1D NOESY spectrum of compound 4.

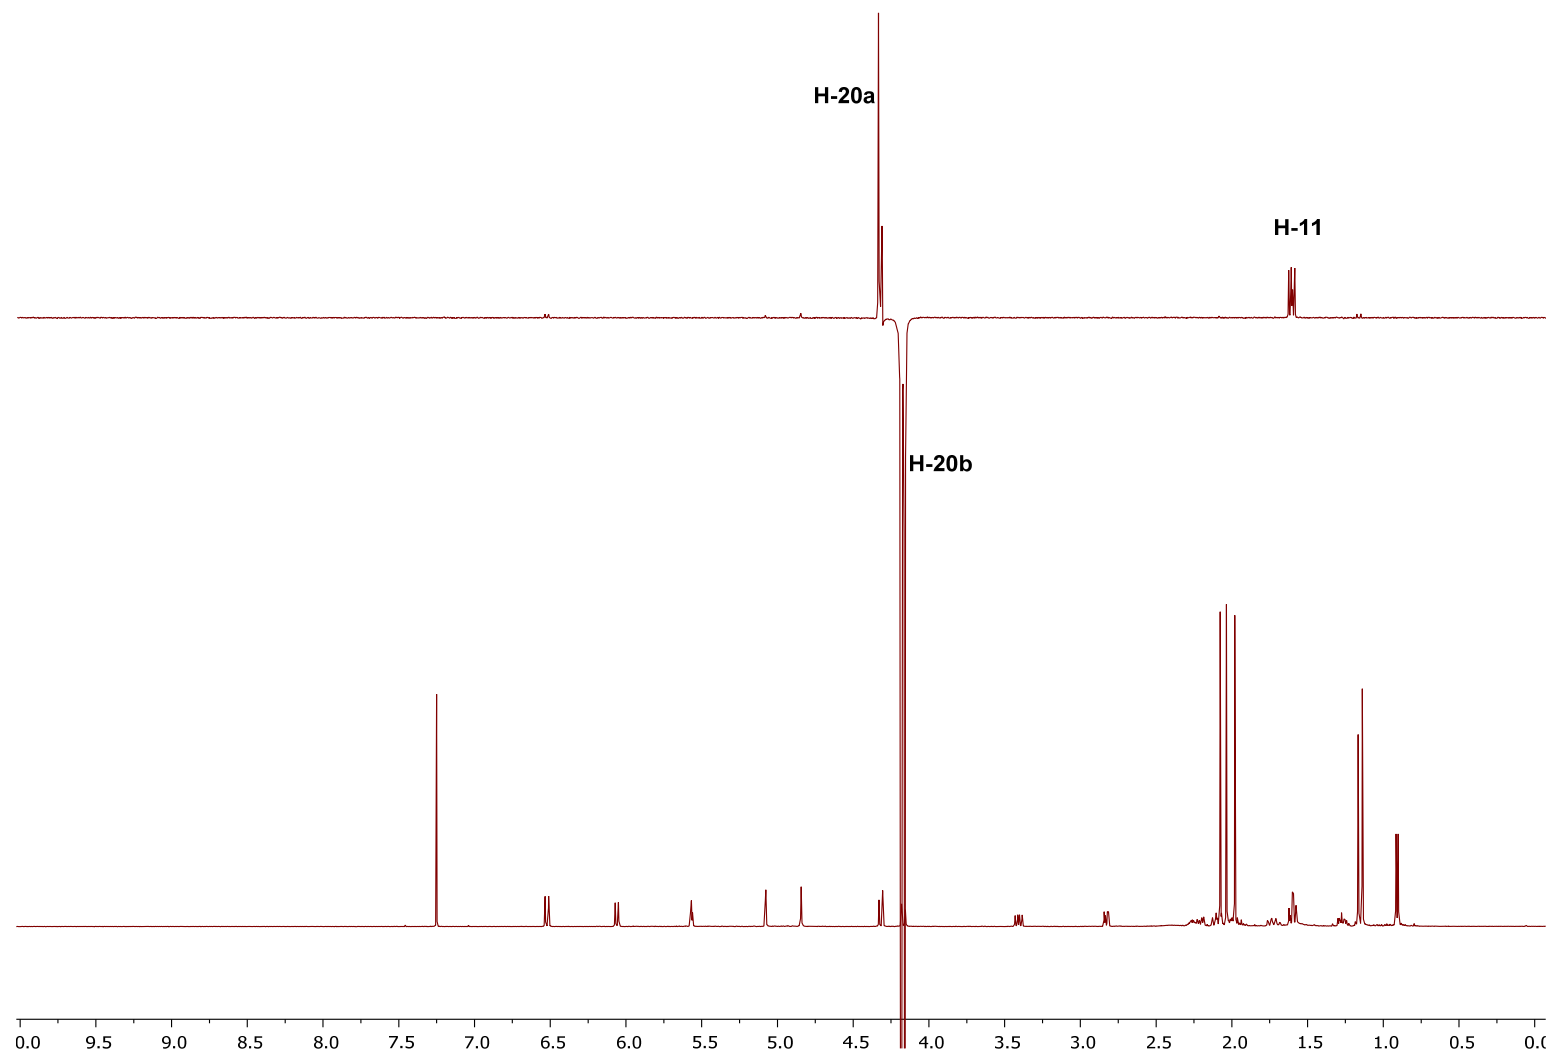

**Figure S15c.** 1D NOESY spectrum of compound 4.

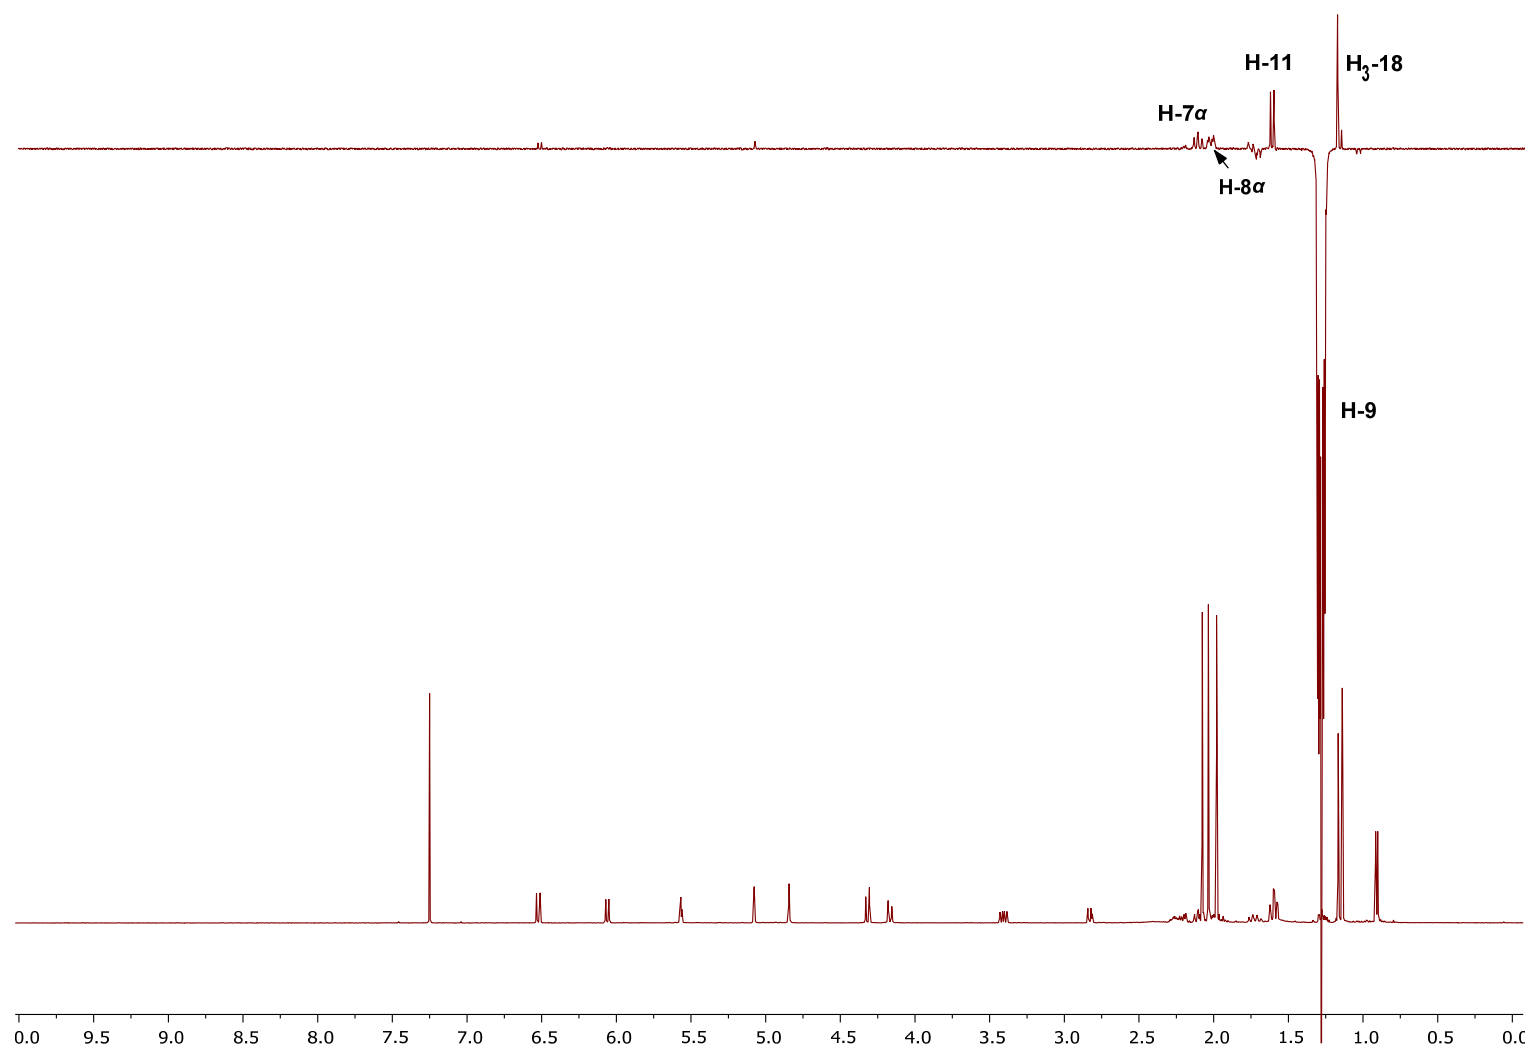

**Figure S15d.** 1D NOESY spectrum of compound **4**.



## Elemental Composition Report

Page 1

### Single Mass Analysis

Tolerance = 5.0 mDa / DBE: min = -1.5, max = 80.0

Element prediction: Off

Number of isotope peaks used for i-FIT = 5

Monoisotopic Mass, Even Electron Ions

87 formula(e) evaluated with 2 results within limits (all results (up to 1000) for each mass)

Elements Used:

C: 0-30 H: 0-50 O: 0-15 <sup>23</sup>Na: 0-1

246\_1009\_Strep-EB12- MSe3pos 148 (2.741)

1: TOF MS ES+  
3.42e+005

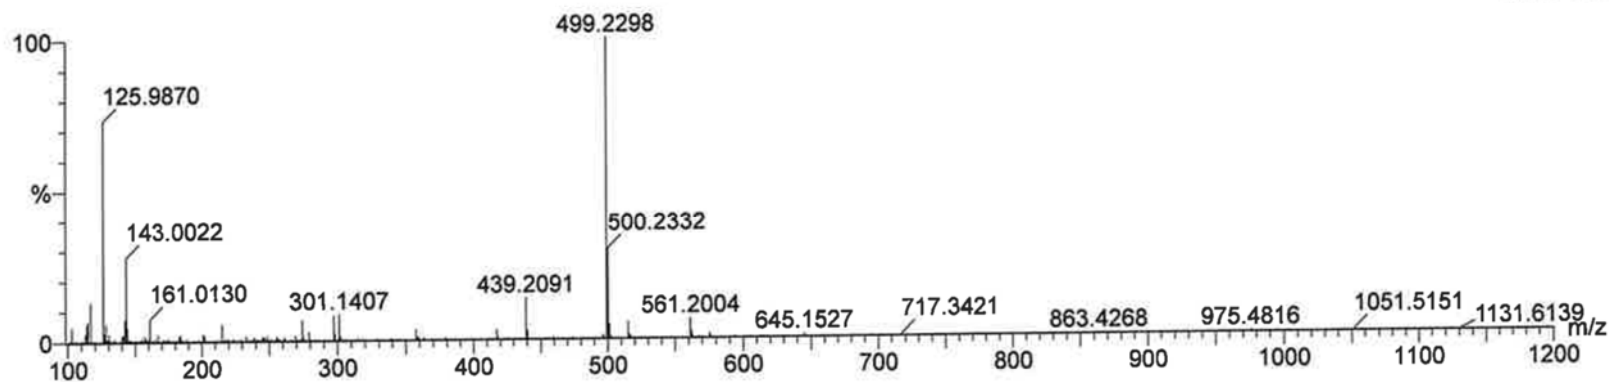

Minimum: -1.5  
Maximum: 5.0 10.0 80.0

| Mass     | Calc. Mass | mDa  | PPM  | DBE  | i-FIT  | Norm  | Conf(%) | Formula                                                         |
|----------|------------|------|------|------|--------|-------|---------|-----------------------------------------------------------------|
| 499.2298 | 499.2308   | -1.0 | -2.0 | 8.5  | 1285.1 | 0.063 | 93.85   | C <sub>26</sub> H <sub>36</sub> O <sub>8</sub> <sup>23</sup> Na |
|          | 499.2332   | -3.4 | -6.8 | 11.5 | 1287.8 | 2.789 | 6.15    | C <sub>28</sub> H <sub>35</sub> O <sub>8</sub>                  |

Figure S16. HRMS of compound 4.

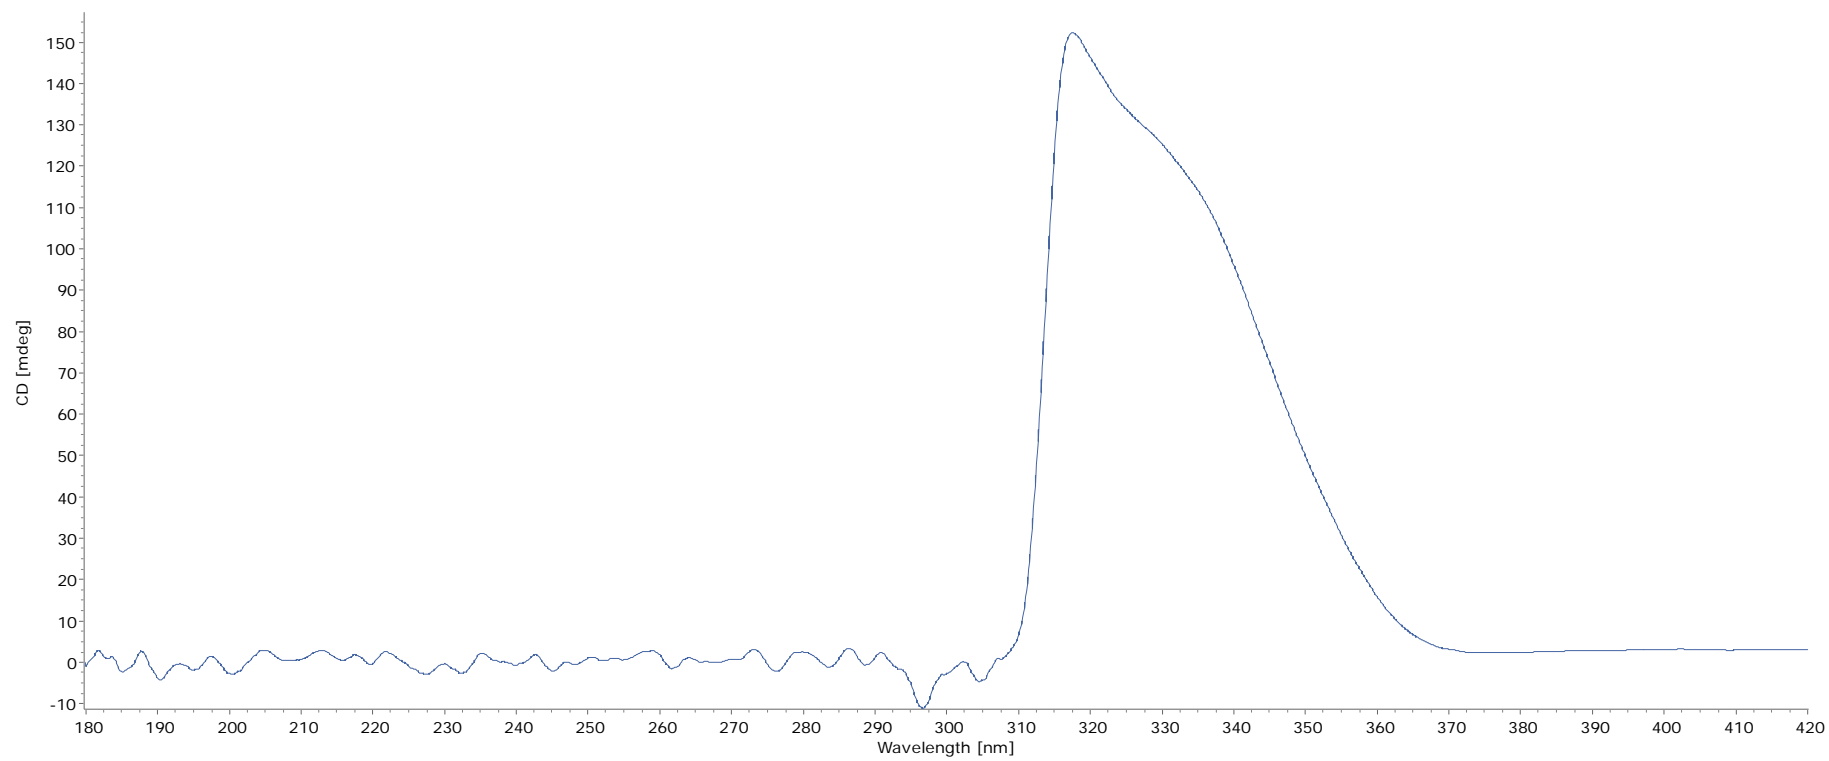

**Figure S17.** ECD of compound **4**.

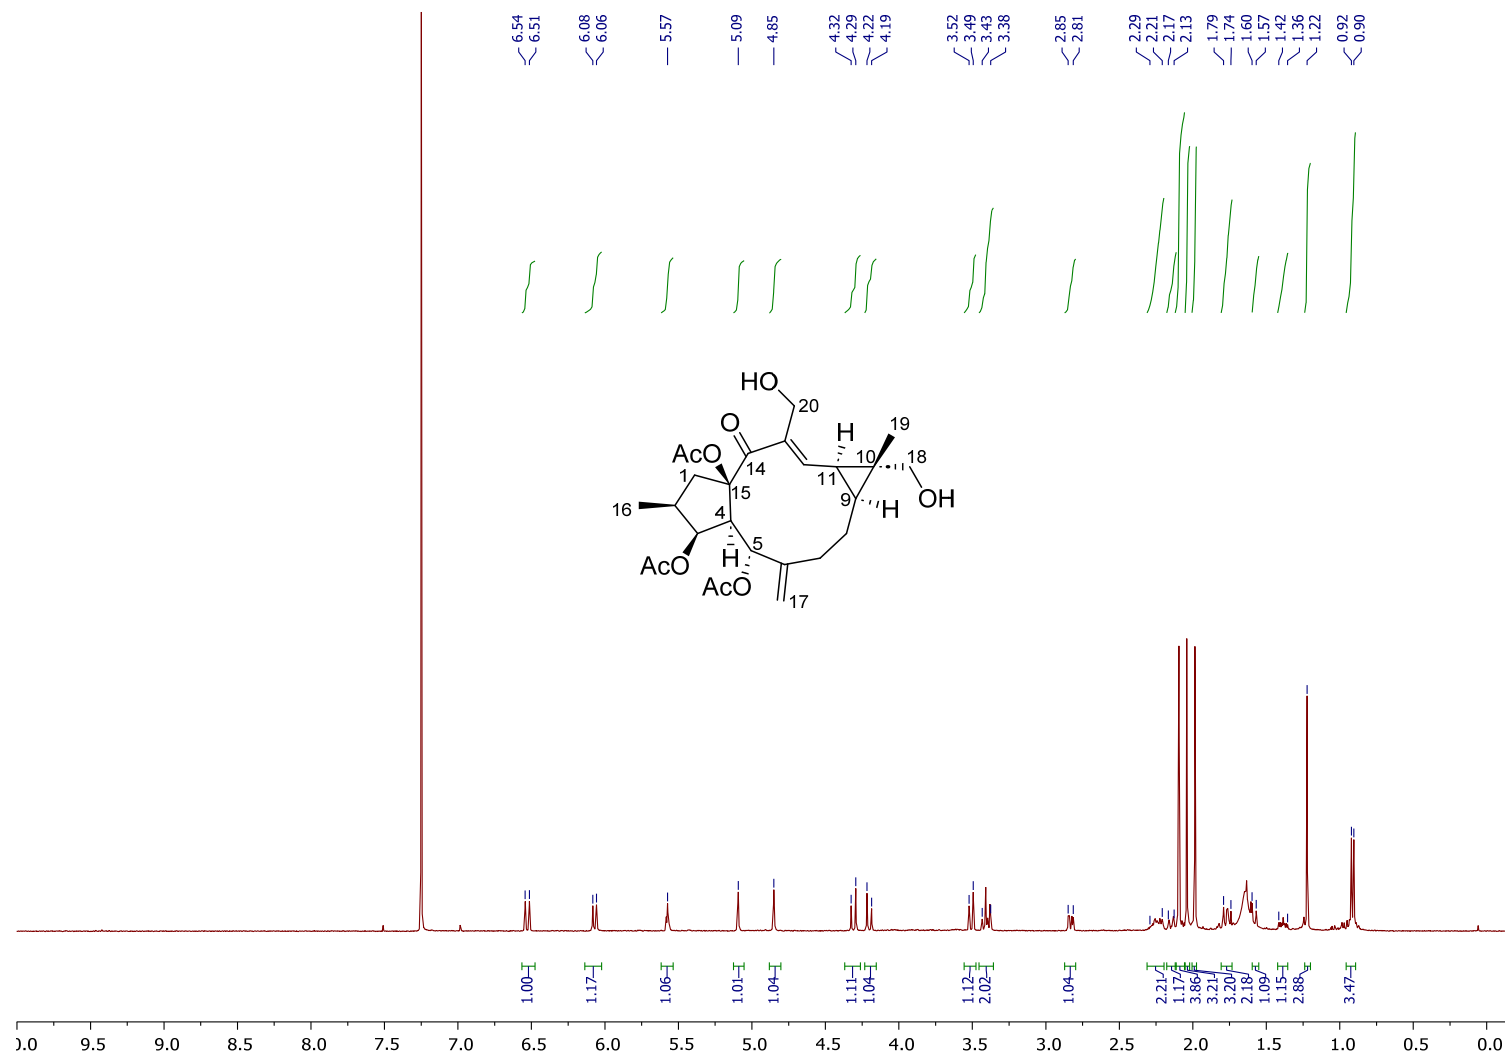

**Figure S18.** <sup>1</sup>H NMR spectrum (400 MHz) of compound **5** in CDCl<sub>3</sub>.

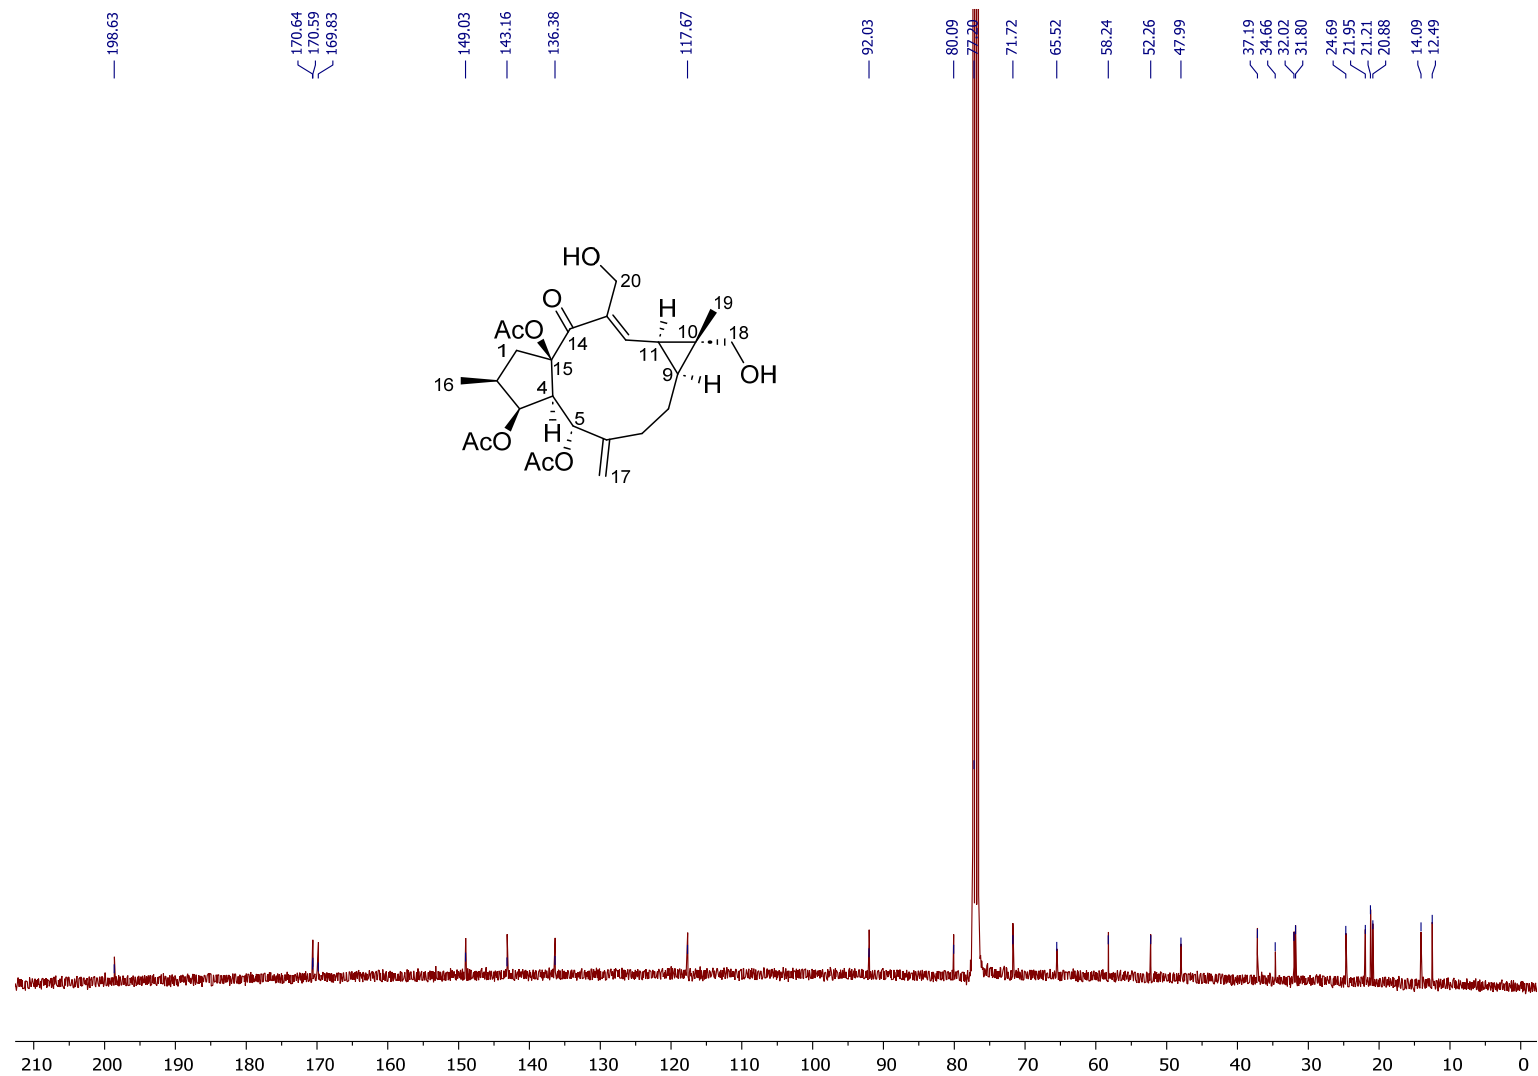

**Figure S19.** <sup>13</sup>C NMR spectrum (100 MHz) of compound **5** in CDCl<sub>3</sub>.

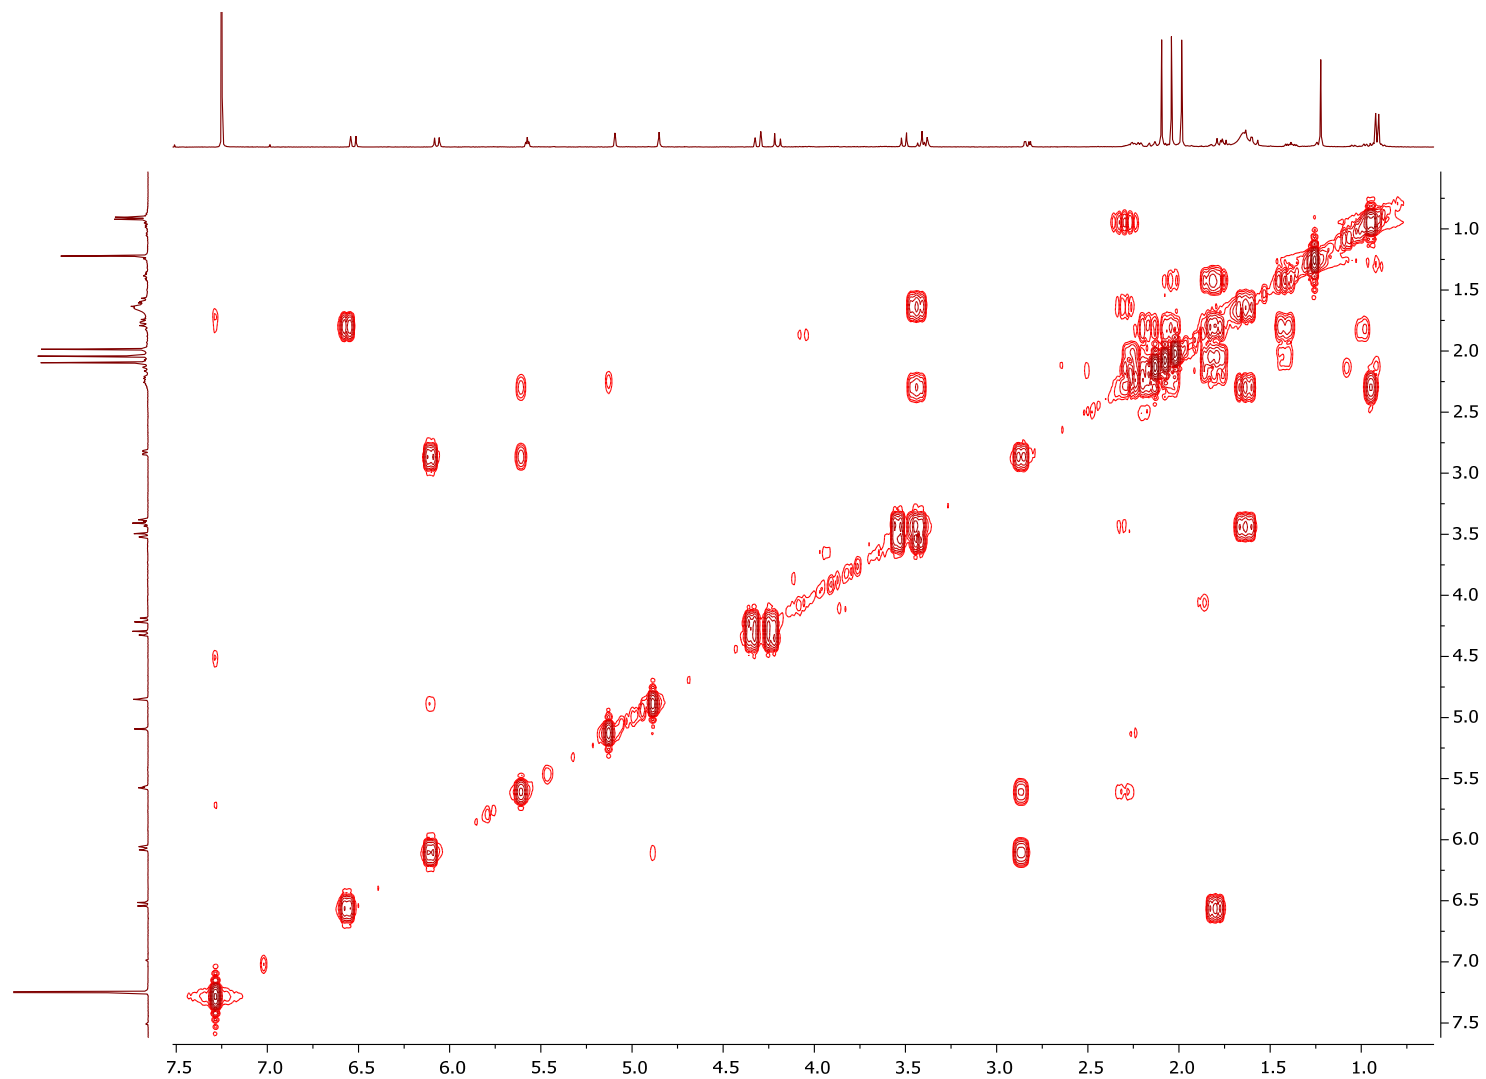

**Figure S20.** gCOSY spectrum of compound **5**.

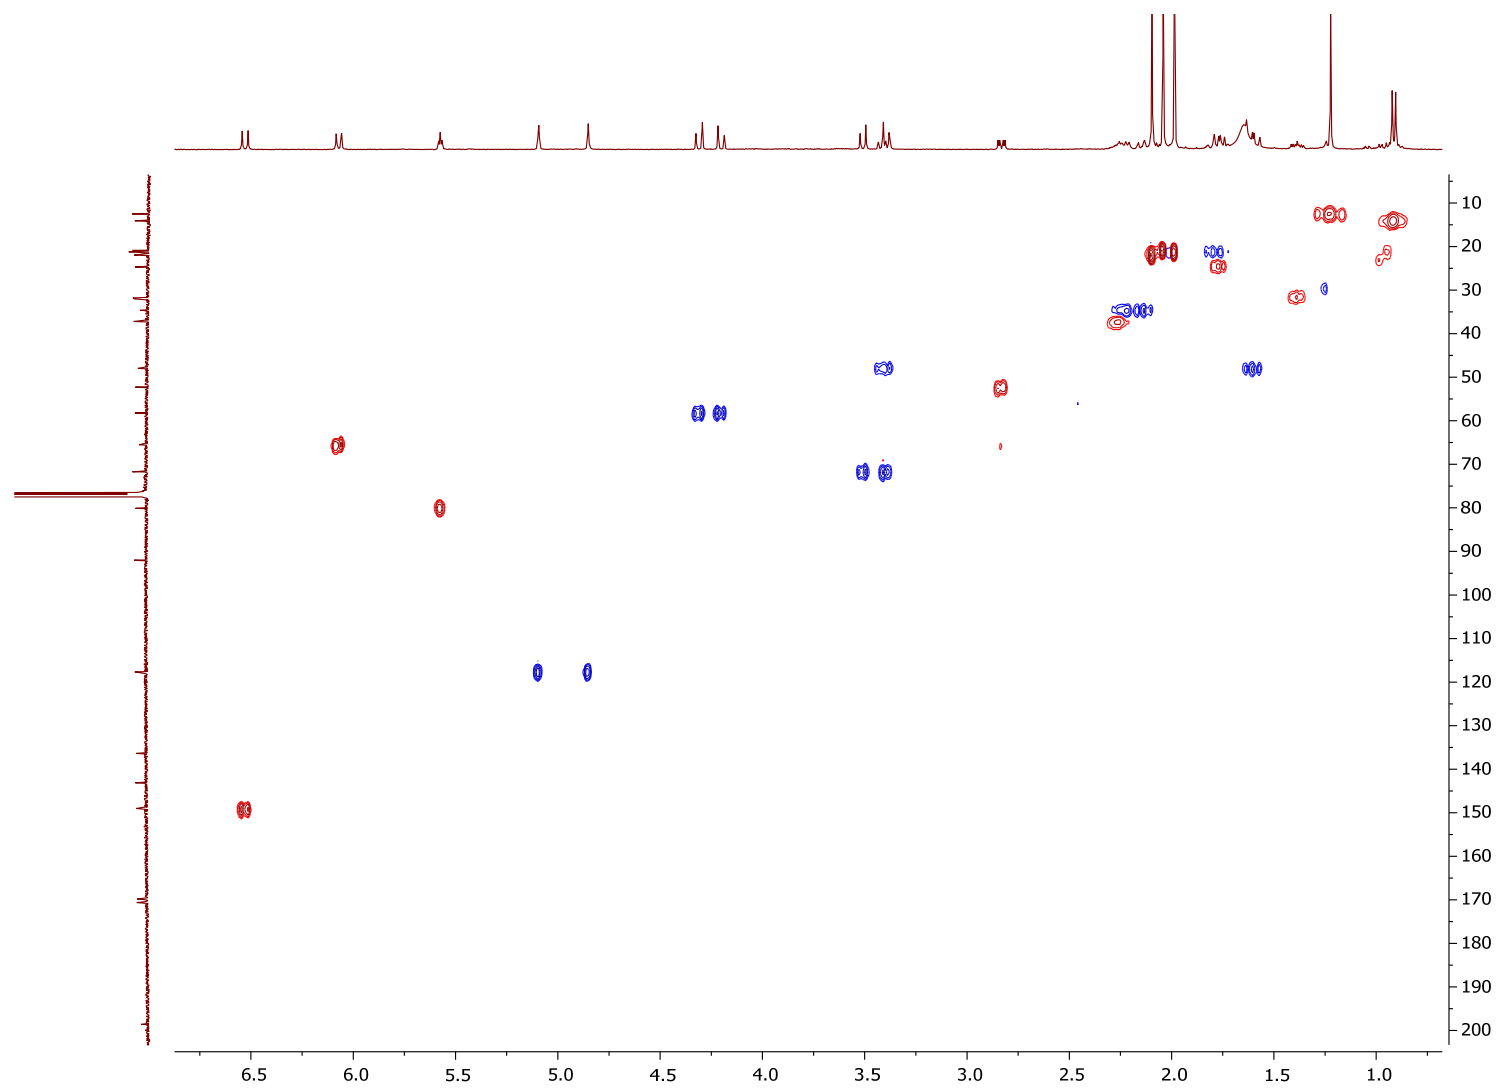

**Figure S21.** gHSQC spectrum of compound **5**.

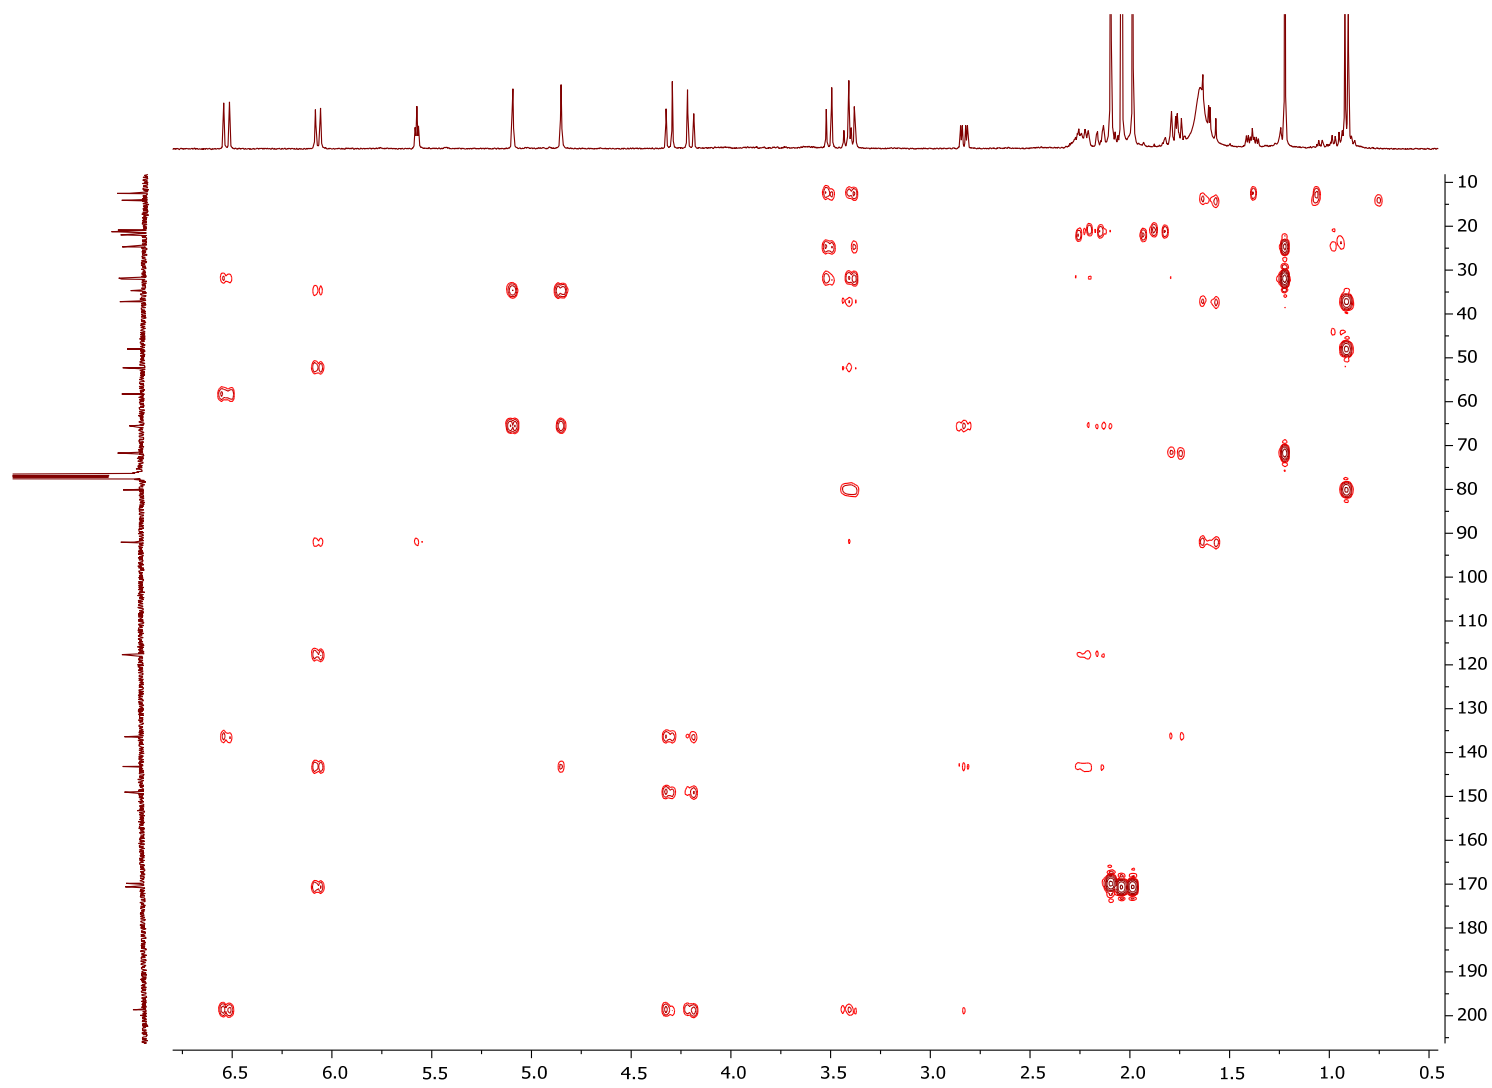

**Figure S22.** gHMBC spectrum of compound **5**.

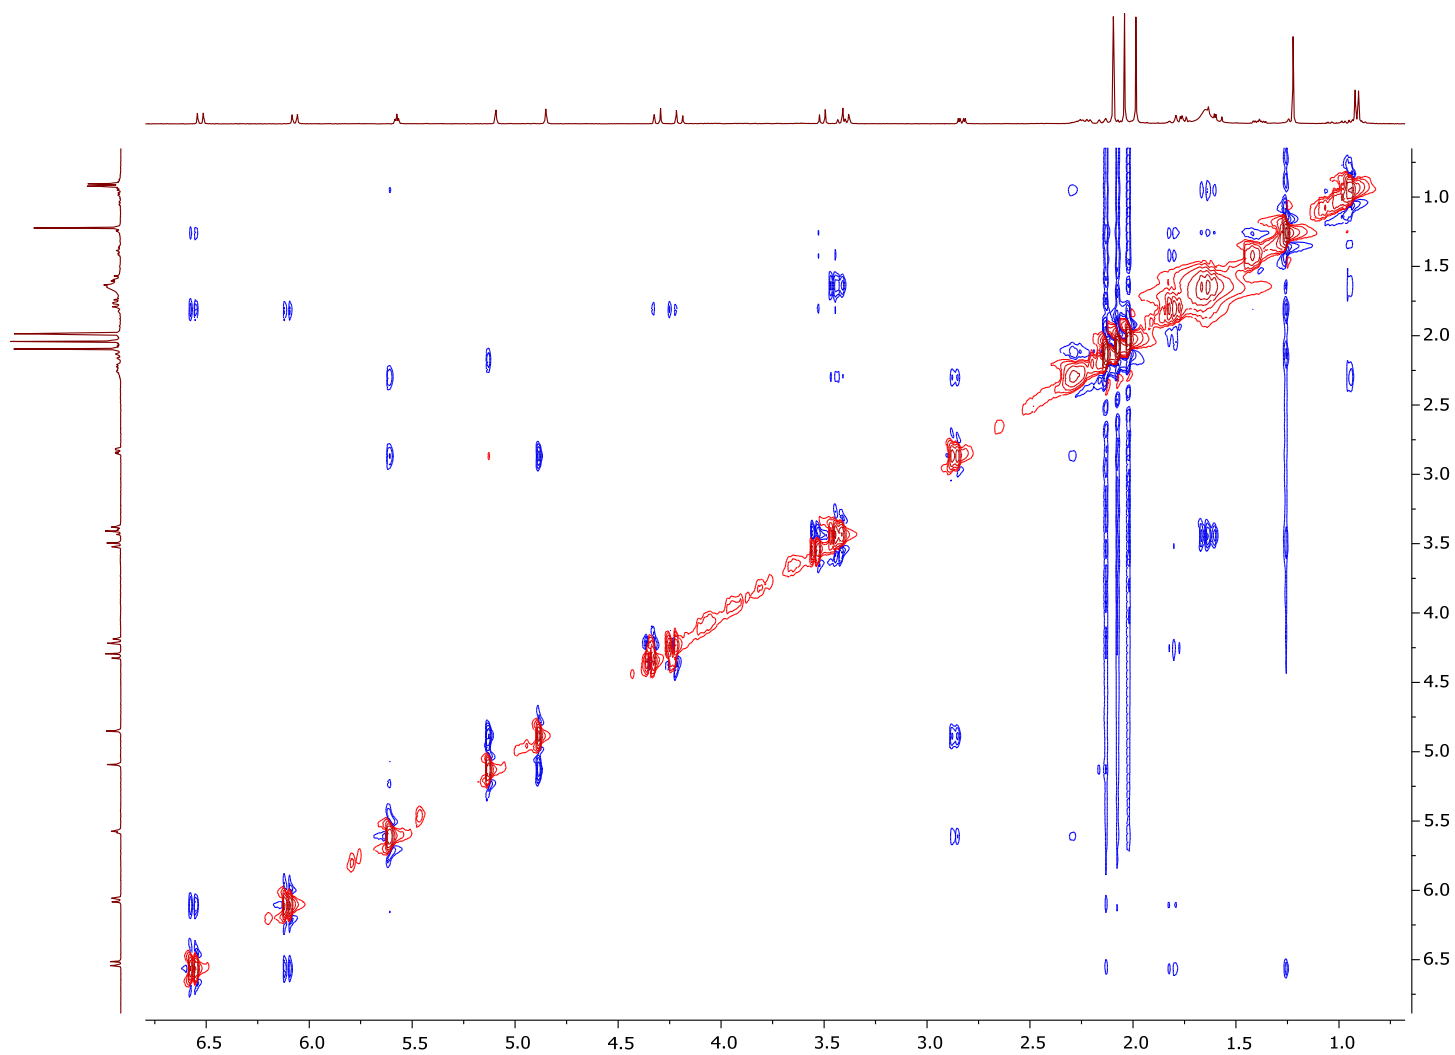

**Figure S23.** 2D NOESY spectrum of compound **5**.



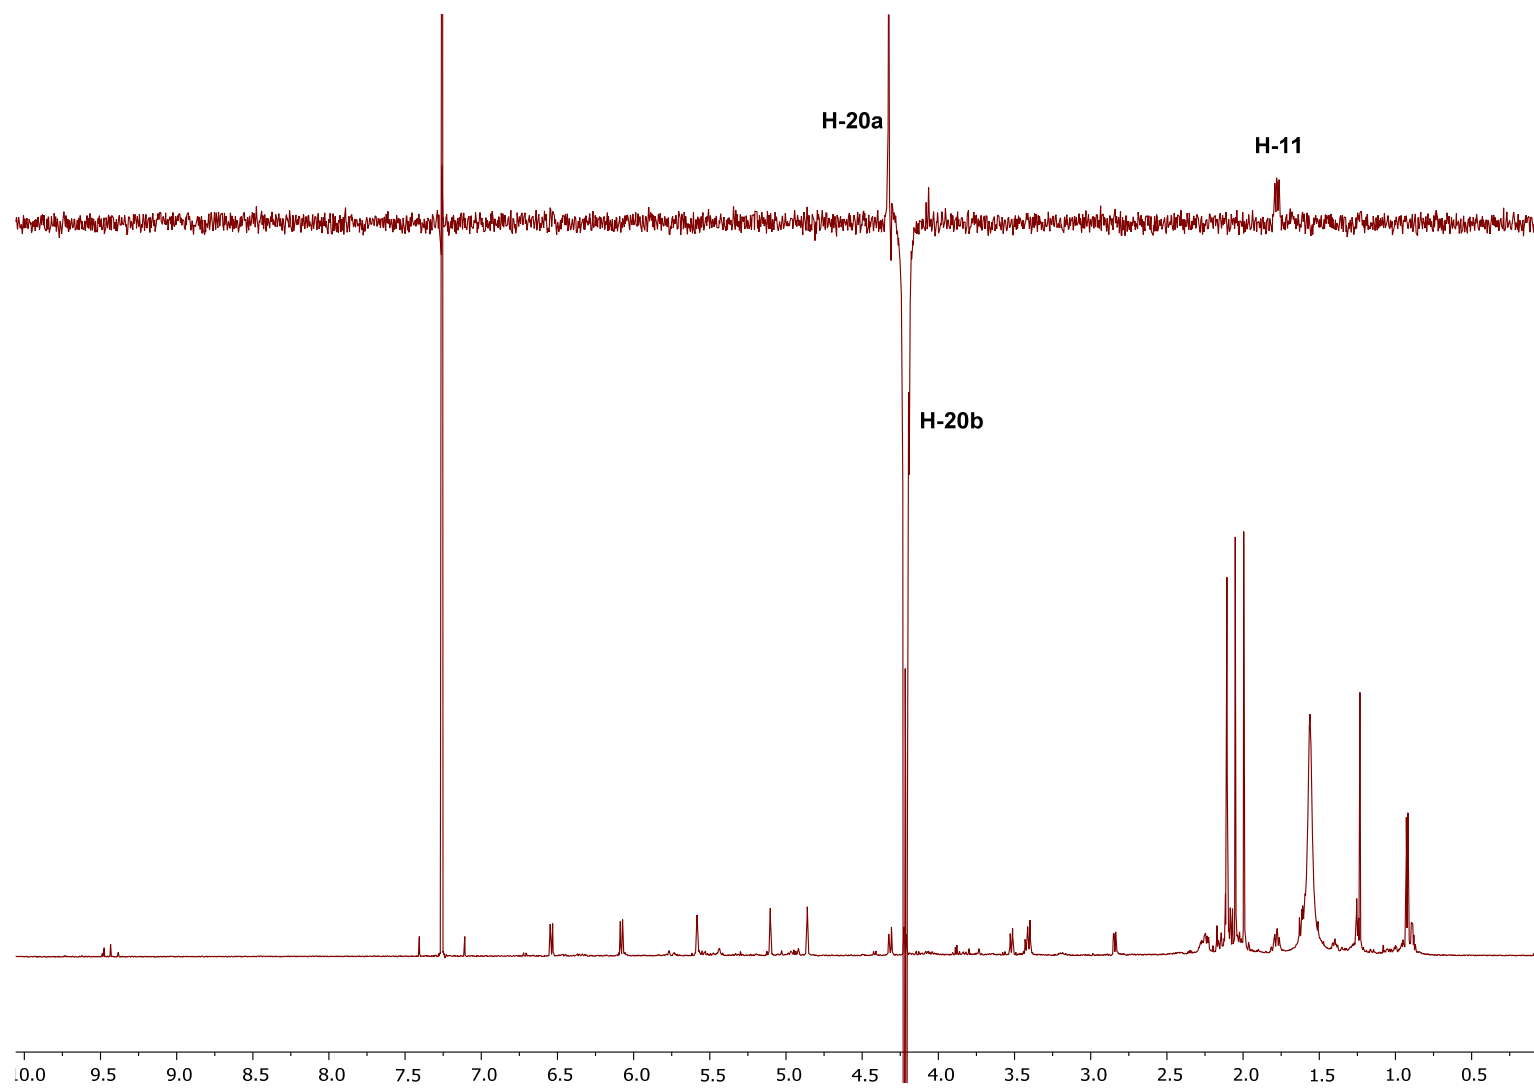

**Figure S24a.** 1D NOESY spectrum of compound **5**.

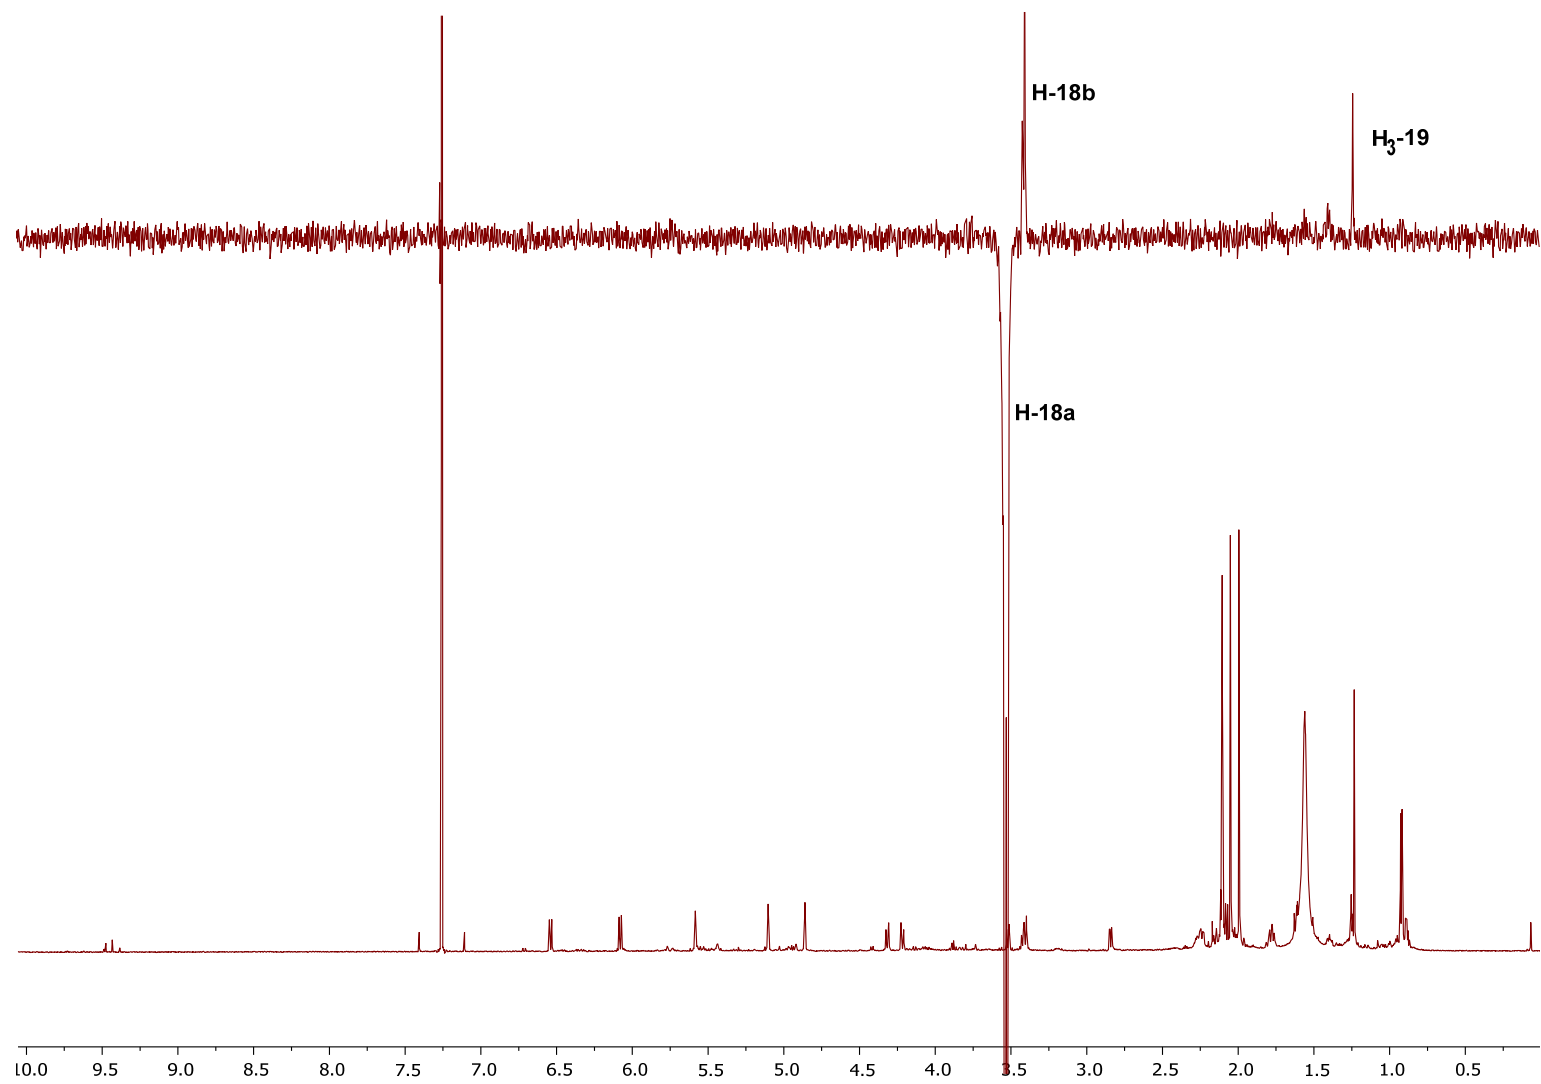

**Figure S24b.** 1D NOESY spectrum of compound **5**.

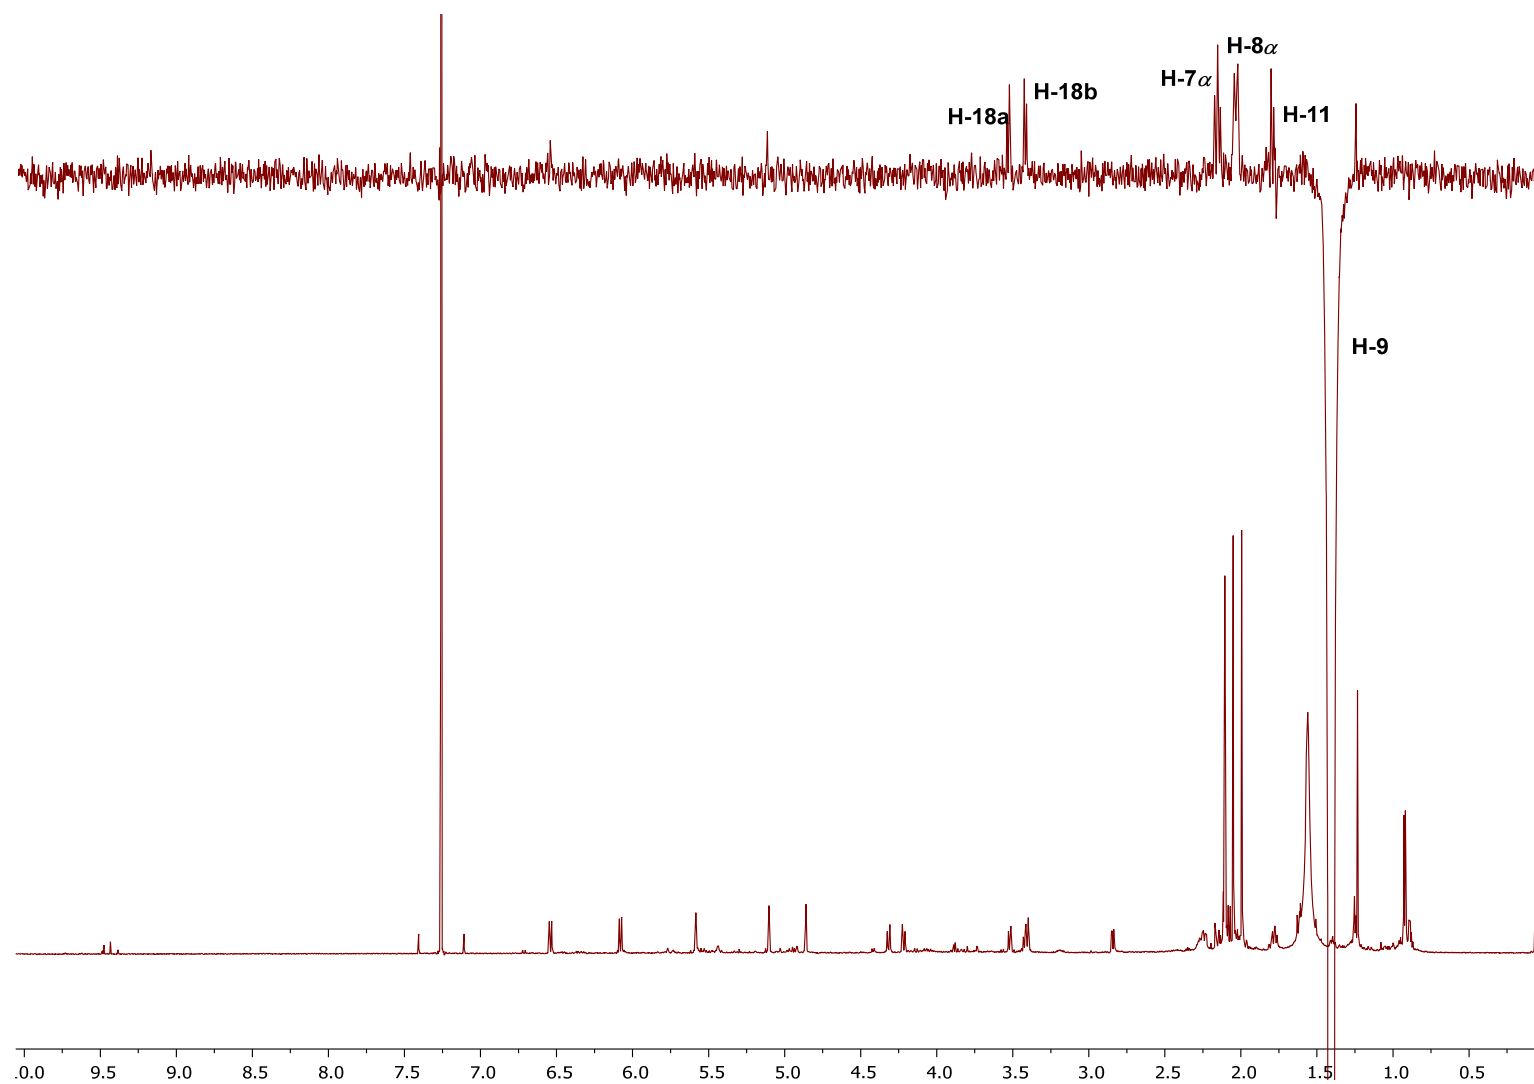

**Figure S24c.** 1D NOESY spectrum of compound **5**.

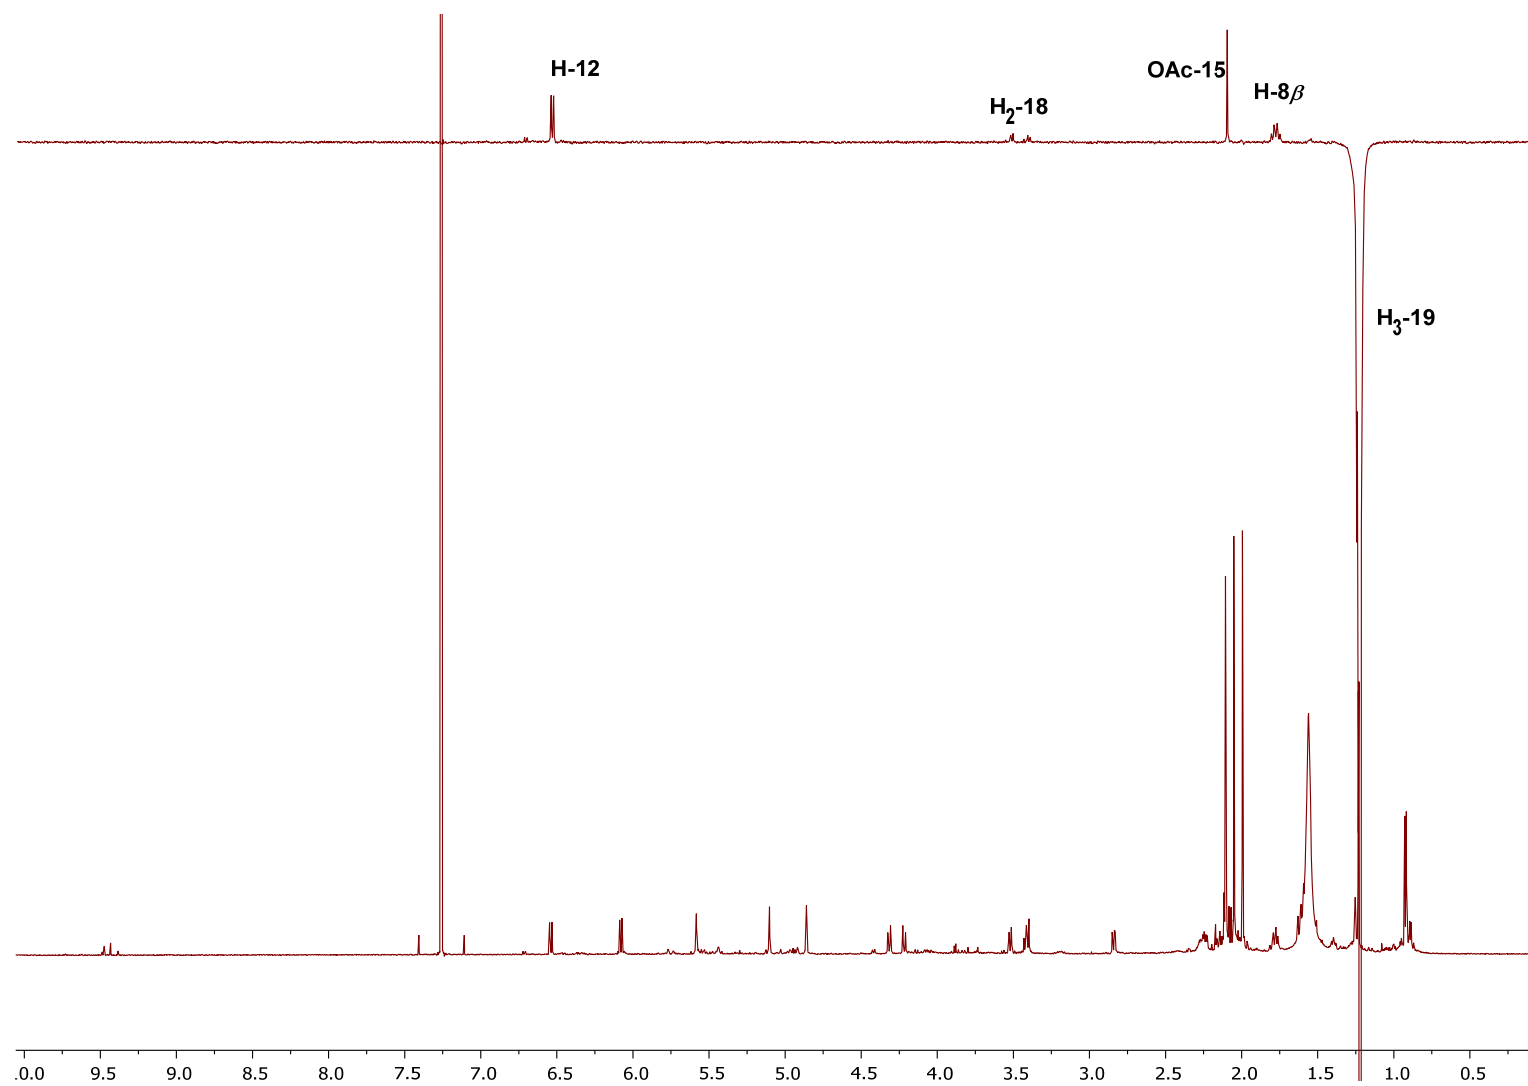

**Figure S24d.** 1D NOESY spectrum of compound **5**.

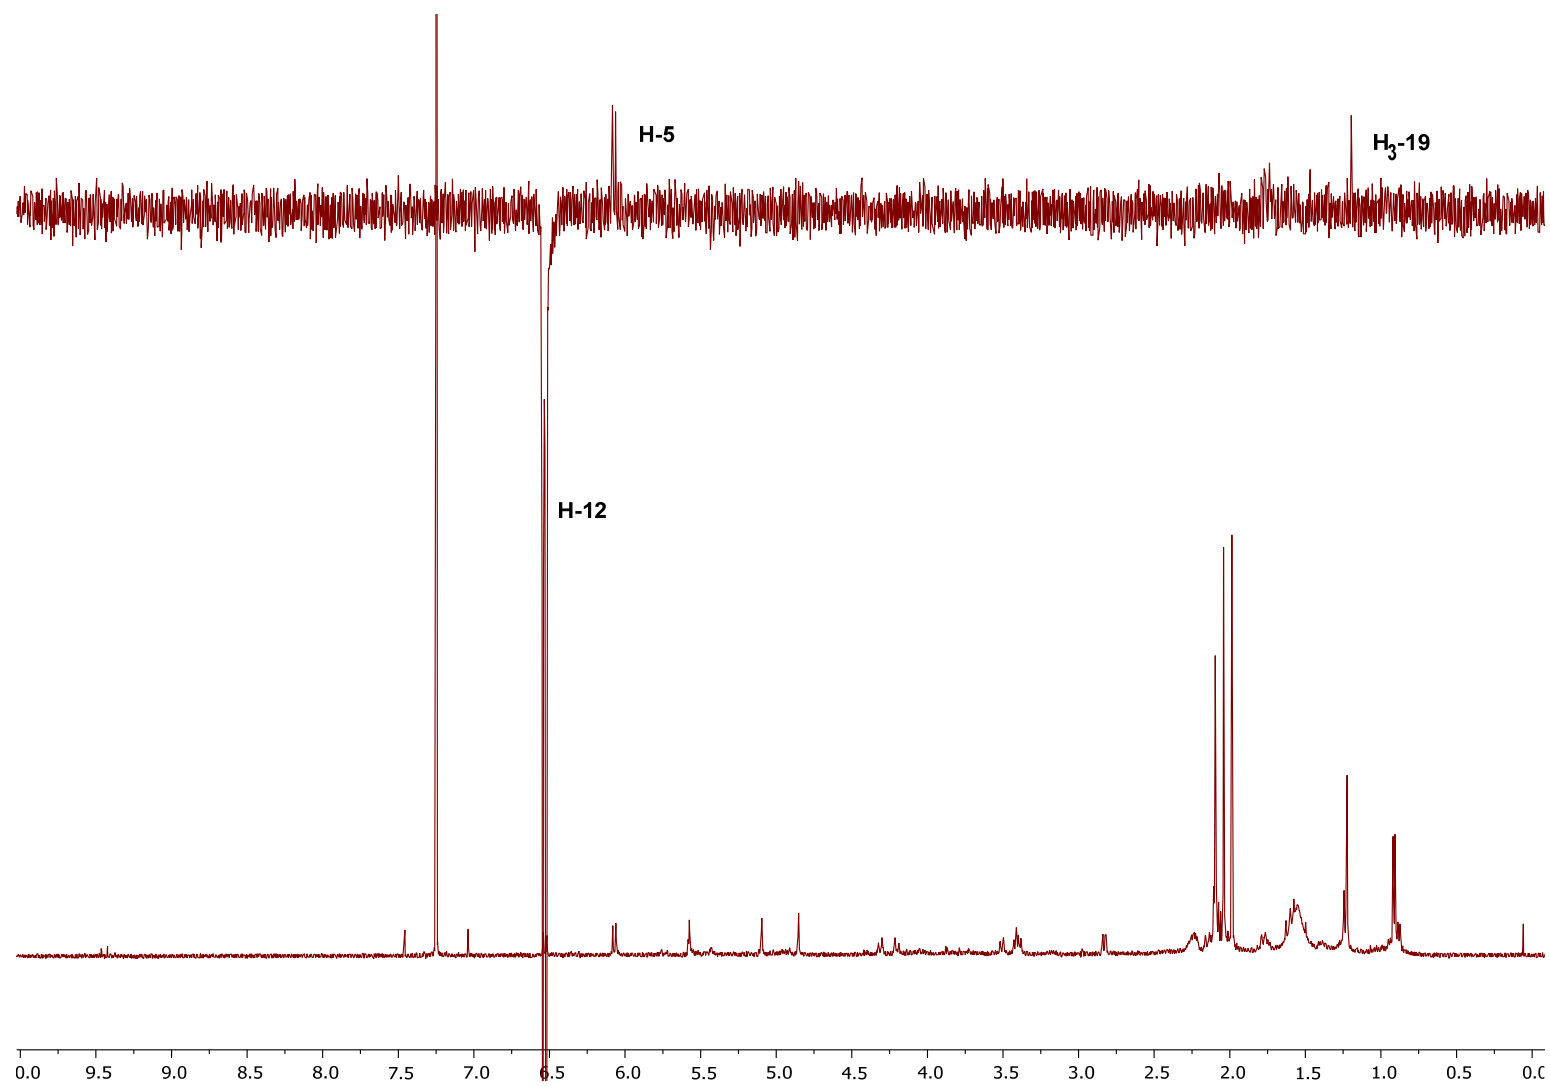

Figure S24e. 1D NOESY spectrum of compound 5.

## Elemental Composition Report

Page 1

### Single Mass Analysis

Tolerance = 5.0 mDa / DBE: min = -1.5, max = 50.0

Element prediction: Off

Number of isotope peaks used for i-FIT = 3

Monoisotopic Mass, Even Electron Ions

215 formula(e) evaluated with 3 results within limits (all results (up to 1000) for each mass)

Elements Used:

C: 0-50 H: 0-200 O: 0-20 Na: 0-1

C<sub>26</sub>H<sub>36</sub>O<sub>9</sub> FELIPE

267 191 (0.749)

1: TOF MS ES+  
1.64e+007

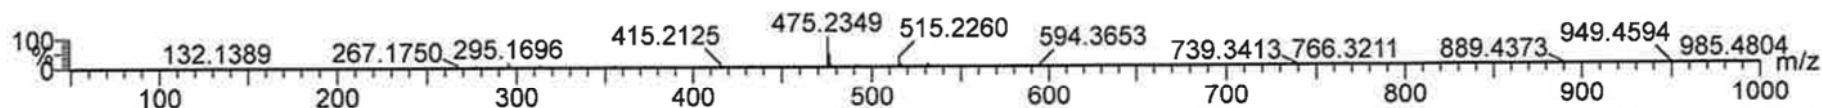

Minimum: -1.5  
Maximum: 5.0 10.0 50.0

| Mass     | Calc. Mass | mDa  | PPM  | DBE  | i-FIT | Norm  | Conf(%) | Formula                                           |
|----------|------------|------|------|------|-------|-------|---------|---------------------------------------------------|
| 515.2260 | 515.2257   | 0.3  | 0.6  | 8.5  | 717.7 | 0.042 | 95.89   | C <sub>26</sub> H <sub>36</sub> O <sub>9</sub> Na |
|          | 515.2281   | -2.1 | -4.1 | 11.5 | 720.9 | 3.197 | 4.09    | C <sub>28</sub> H <sub>35</sub> O <sub>9</sub>    |
|          | 515.2222   | 3.8  | 7.4  | 20.5 | 725.9 | 8.264 | 0.03    | C <sub>35</sub> H <sub>31</sub> O <sub>4</sub>    |

Figure S25. HRMS of compound 5.

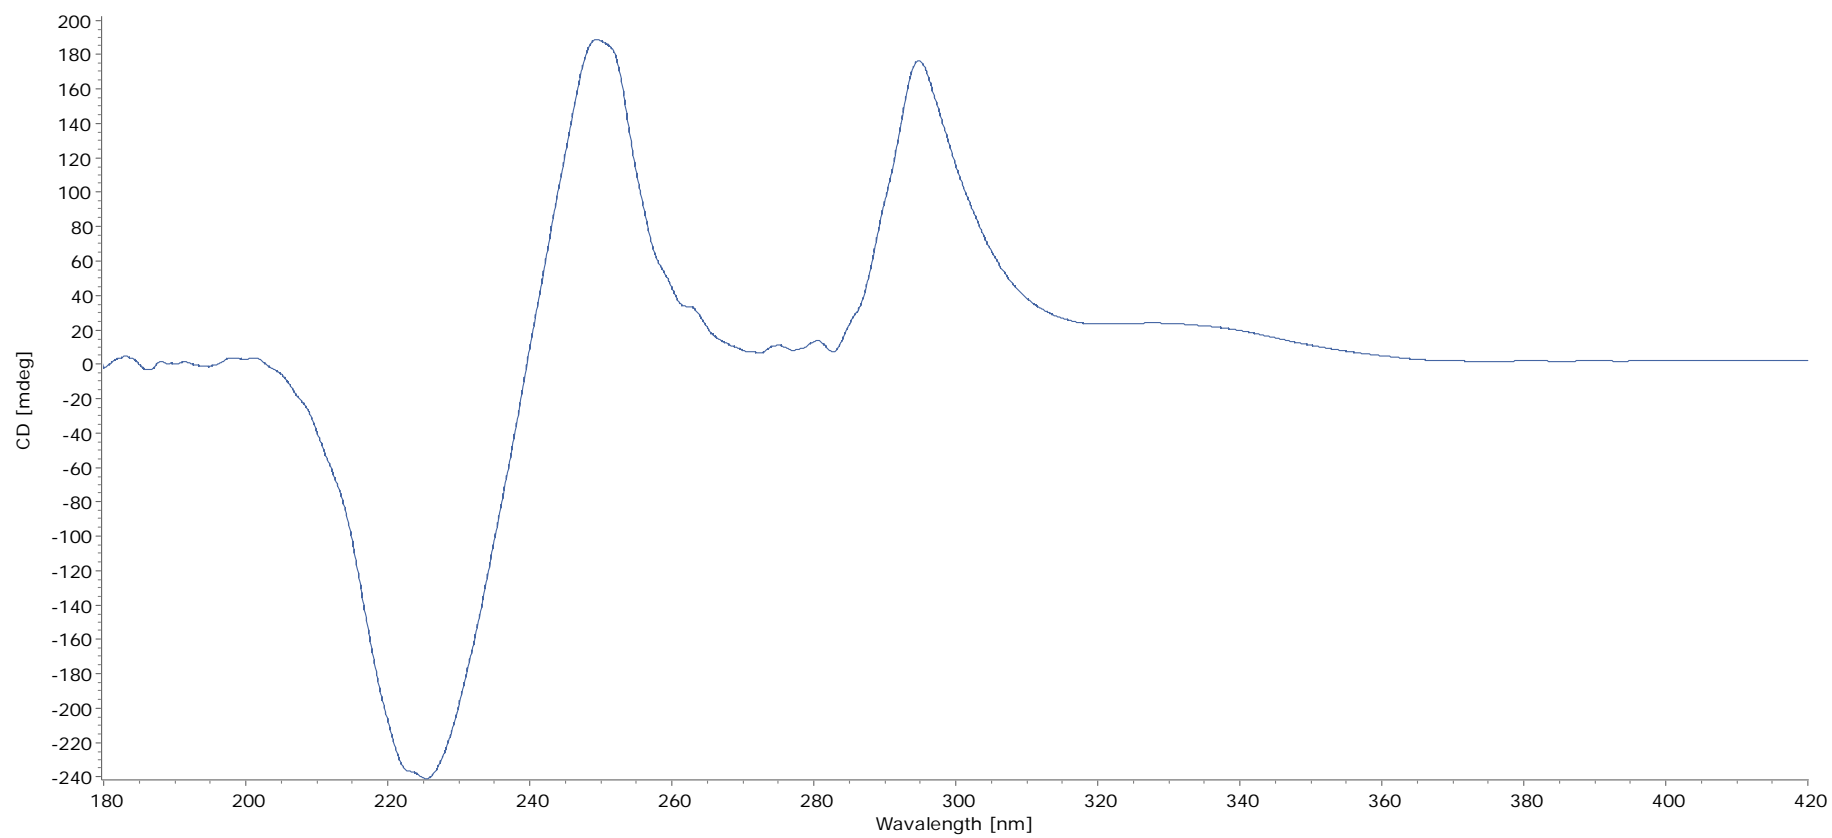

**Figure S26.** ECD of compound **5**.

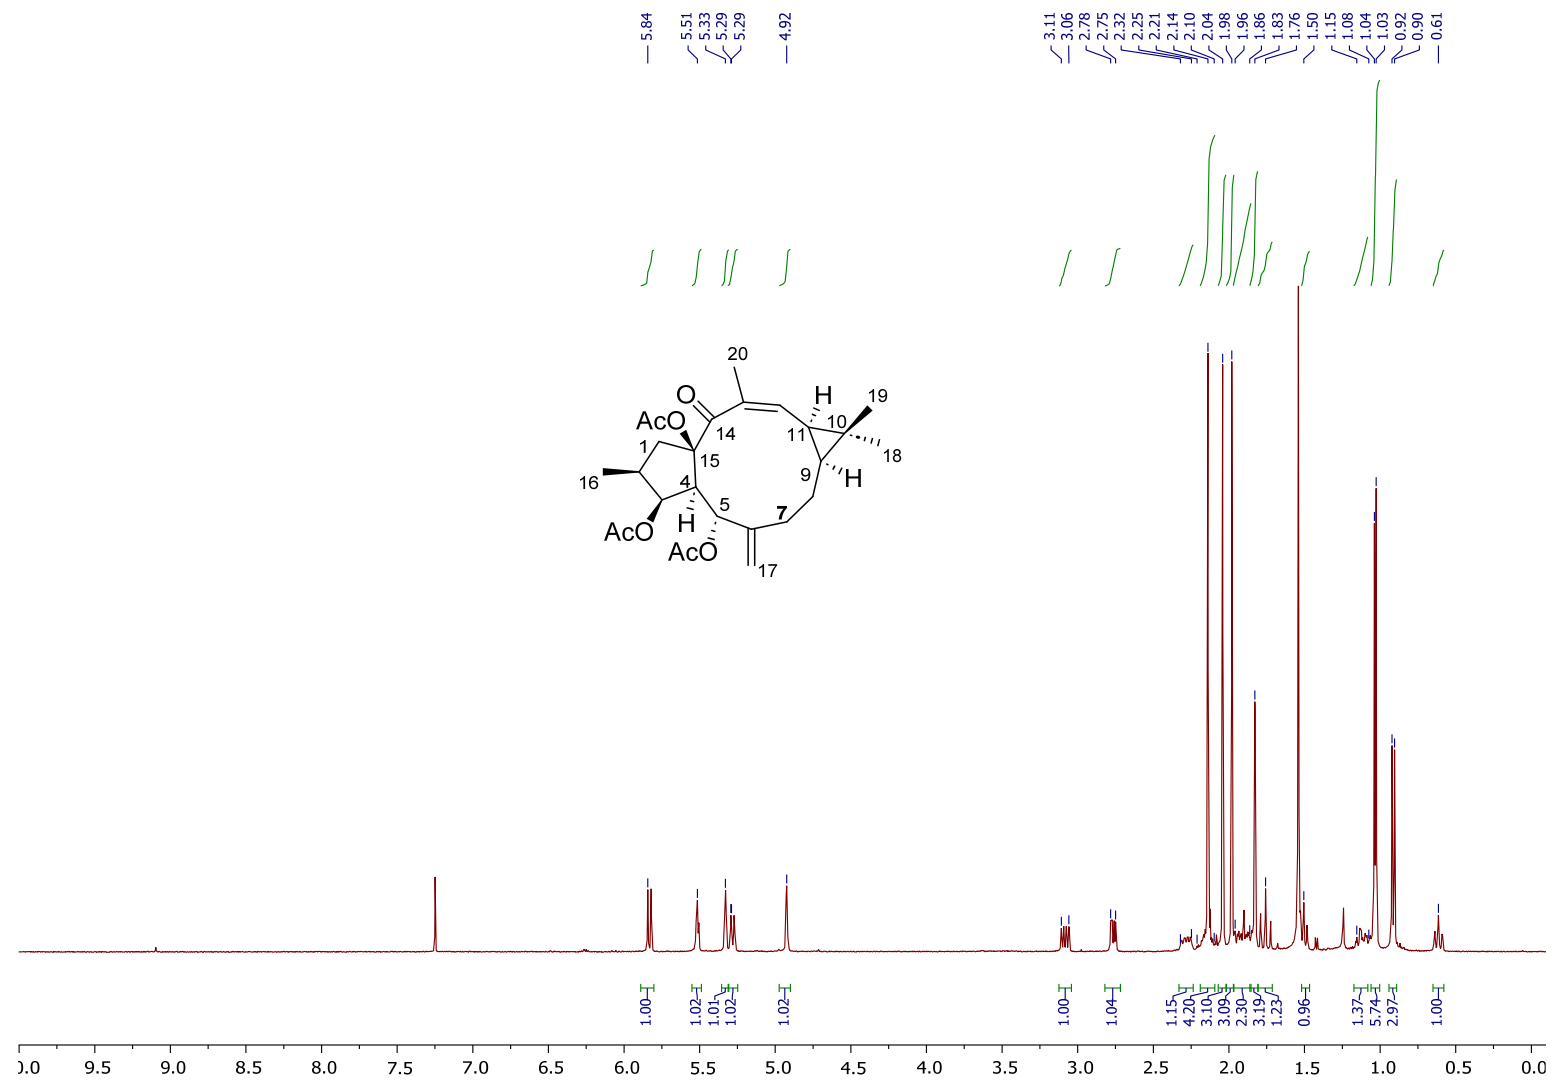

**Figure S27.**  $^1\text{H}$  NMR spectrum (400 MHz) of compound **6** in  $\text{CDCl}_3$ .



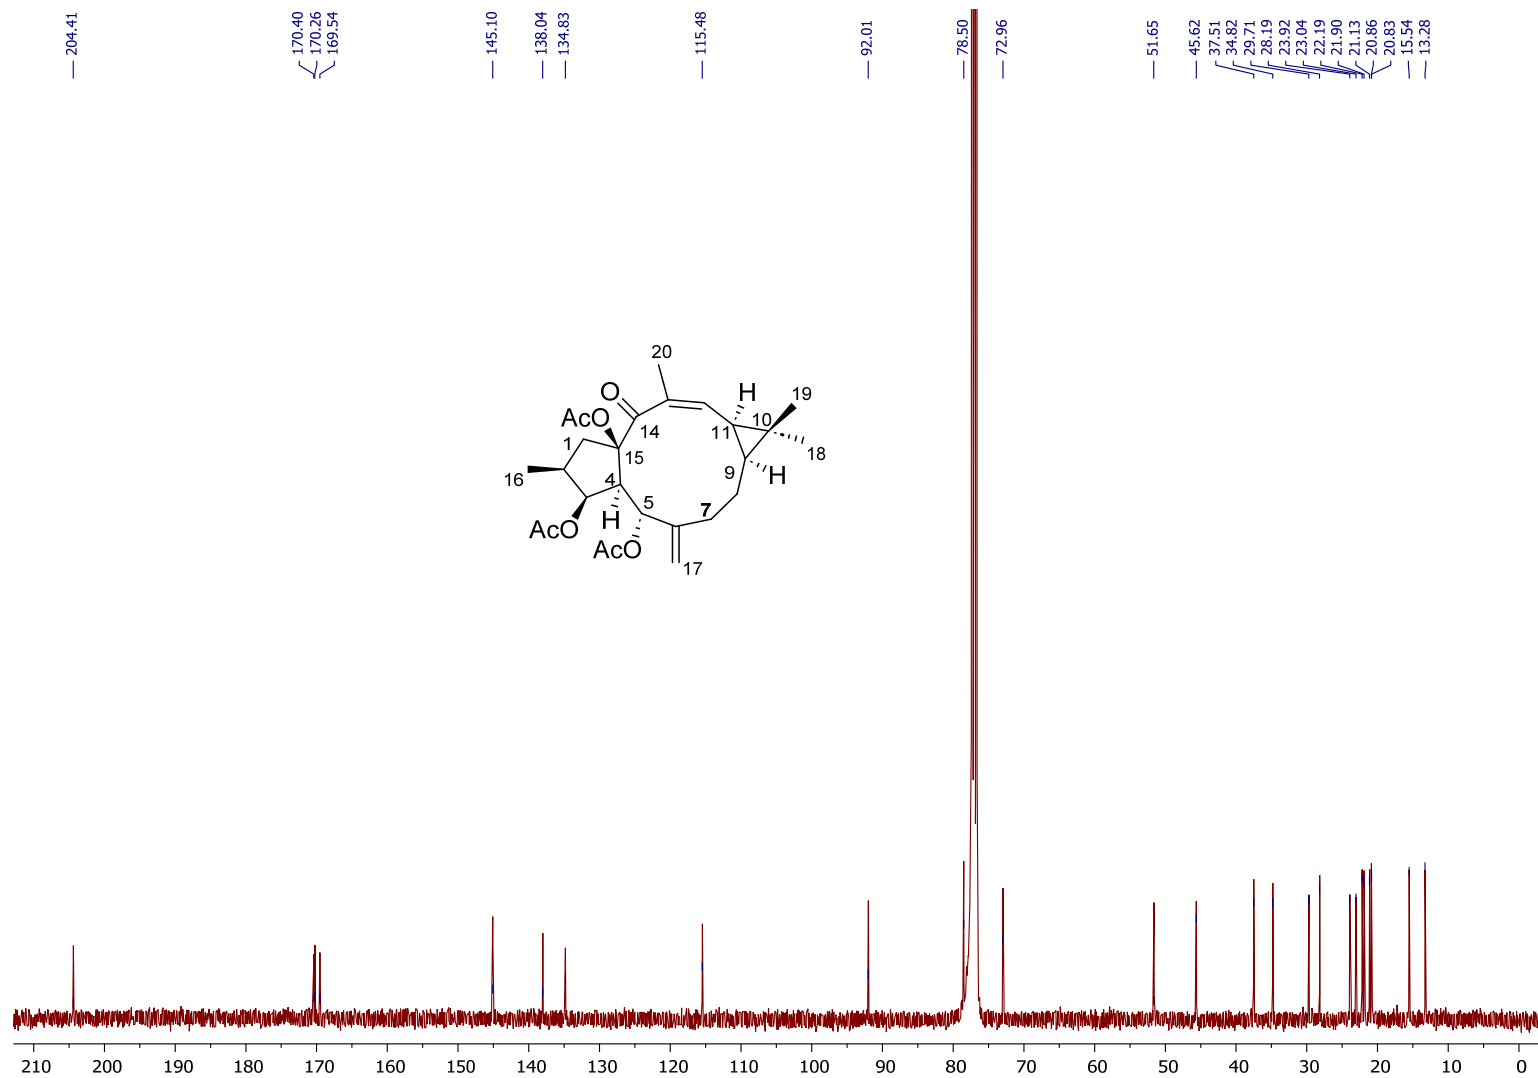

Figure S28. <sup>13</sup>C NMR spectrum (100 Mz) of compound 6 in CDCl<sub>3</sub>.

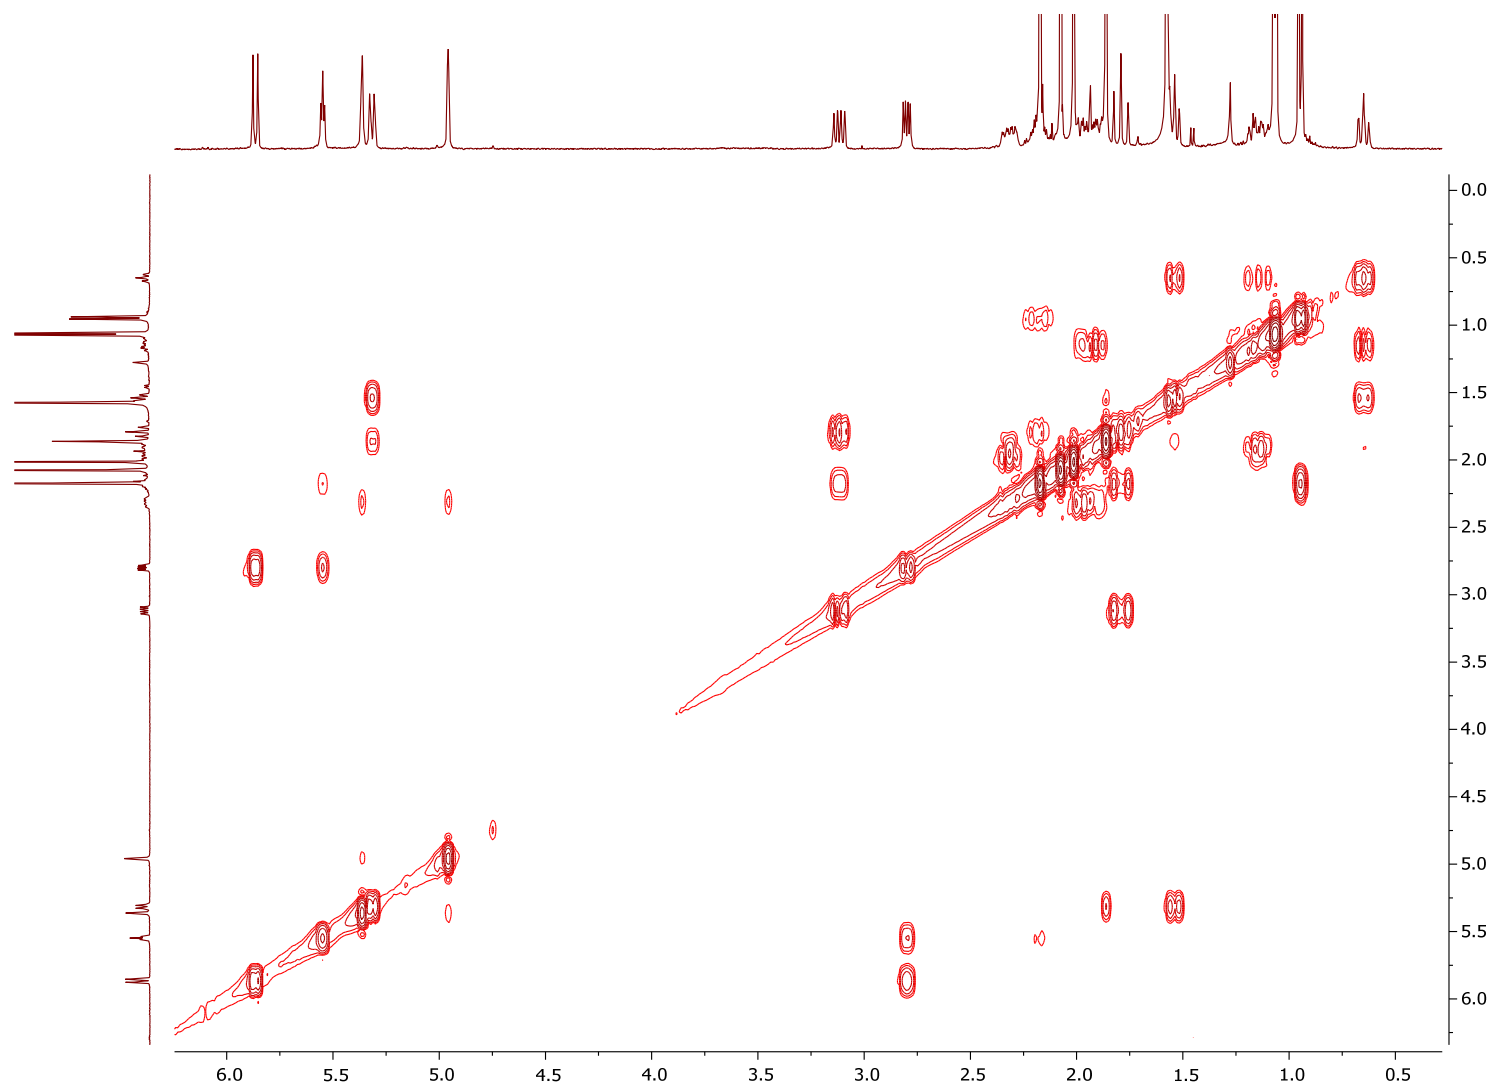

**Figure S29.** gCOSY spectrum of compound **6**.

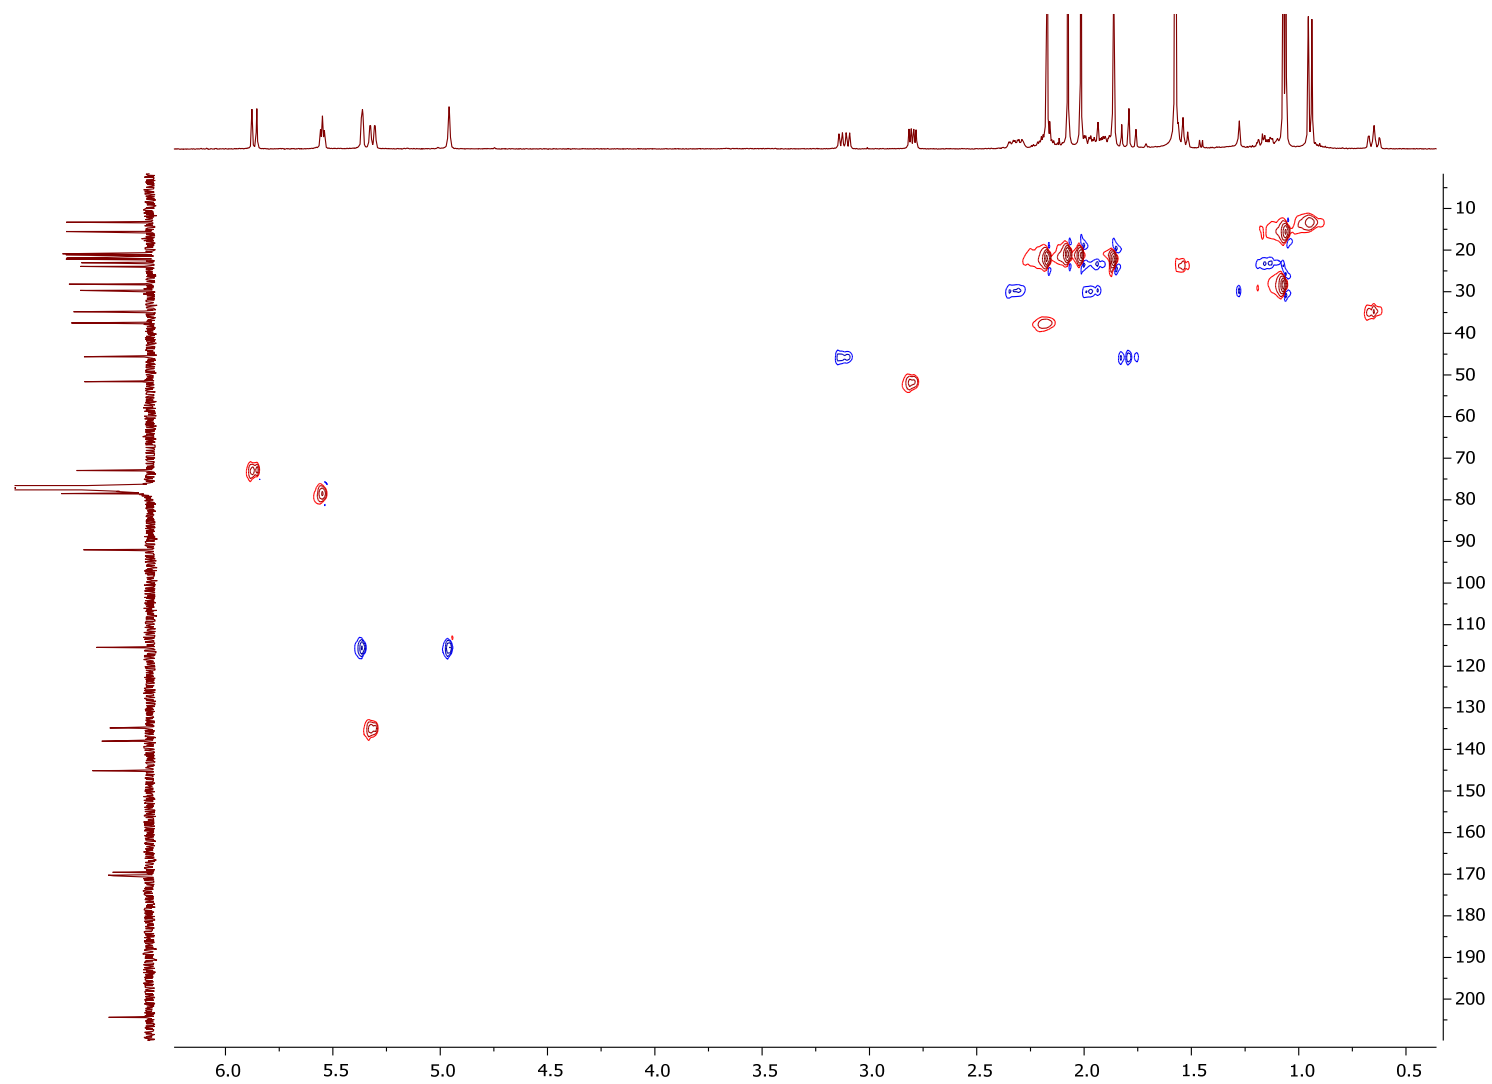

**Figure S30.** gHSQC spectrum of compound 6.

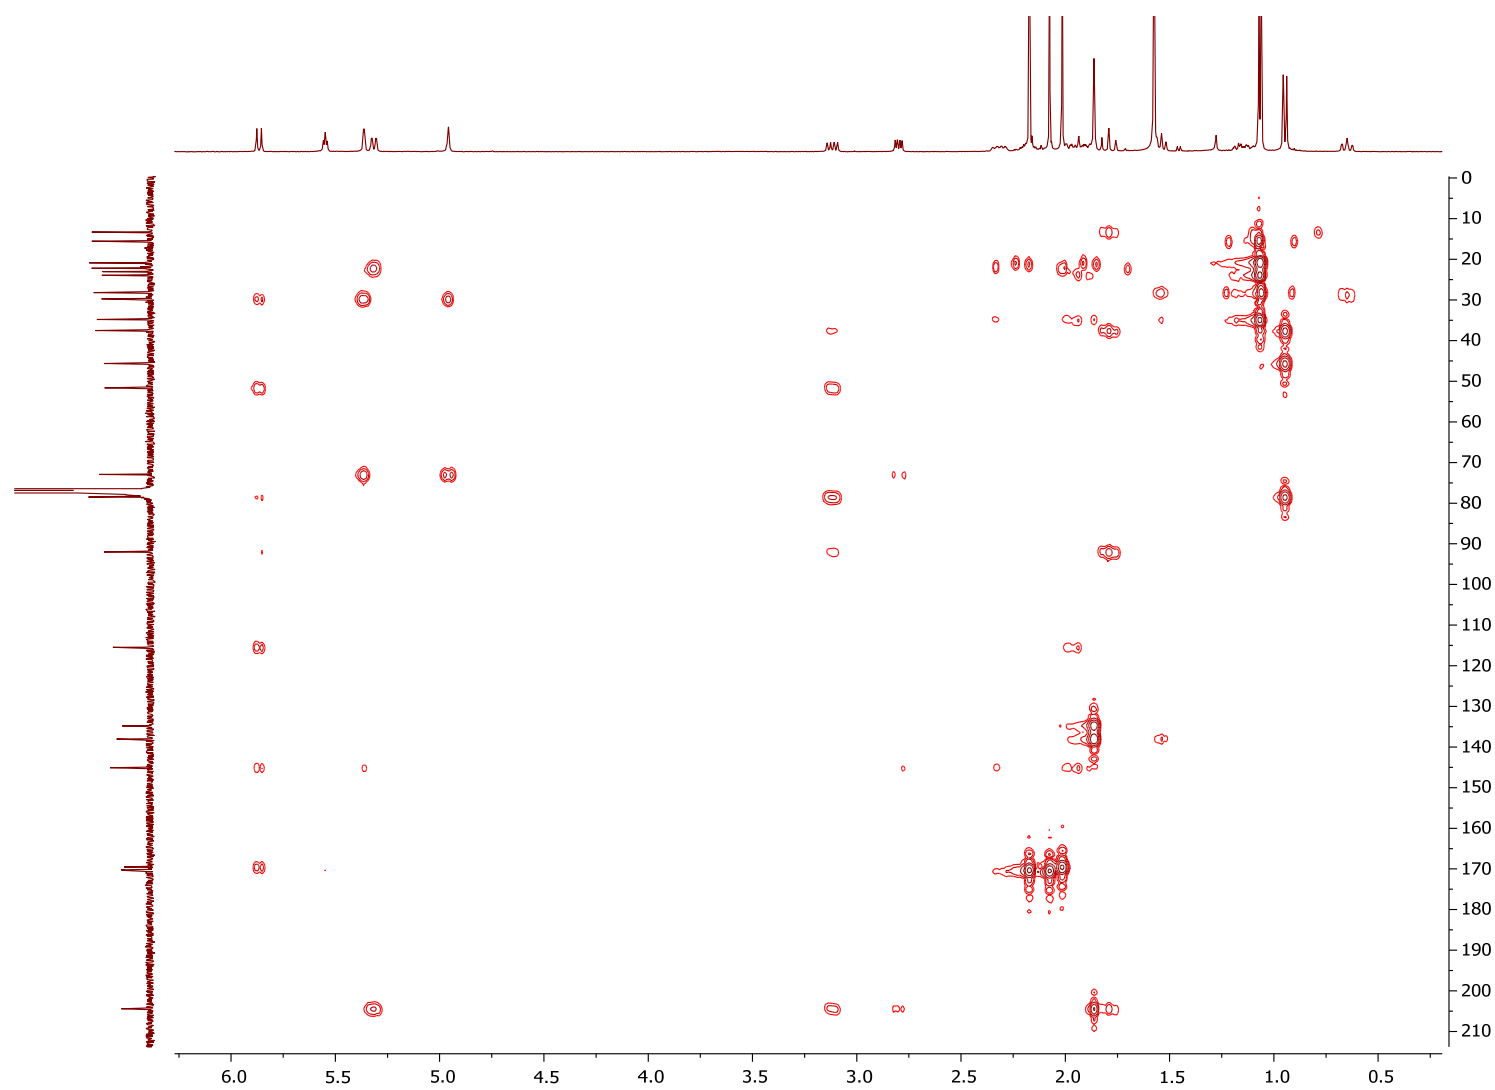

**Figure S31.** gHMBC spectrum of compound **6**.

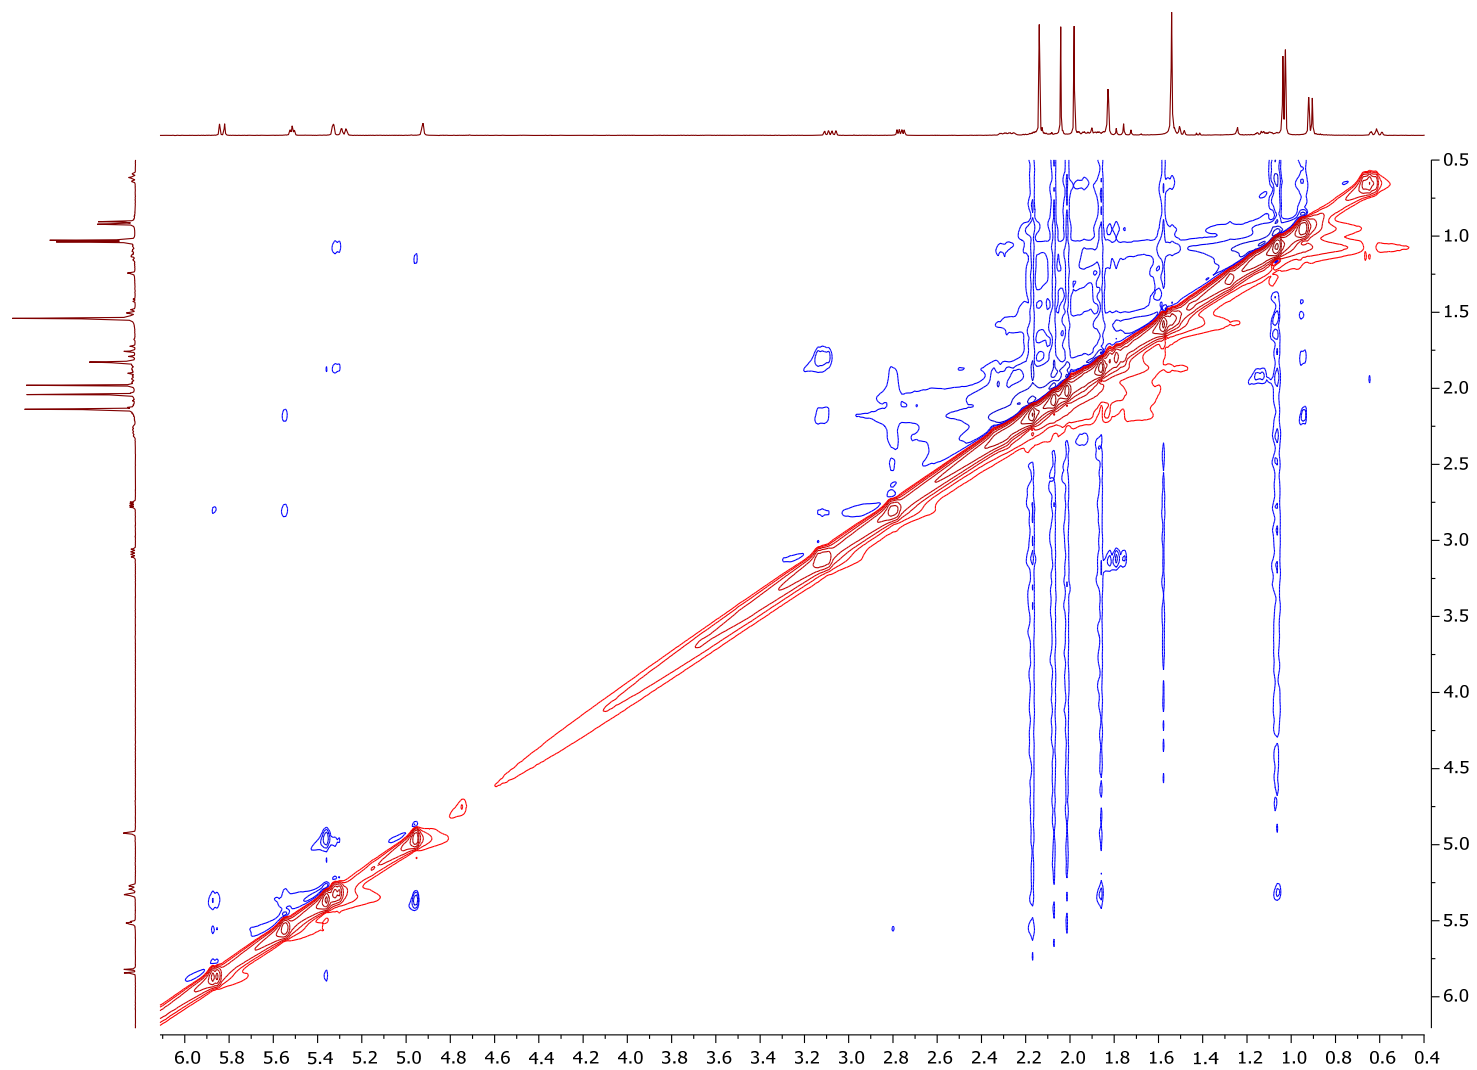

**Figure S32.** 2D NOESY spectrum of compound **6**.

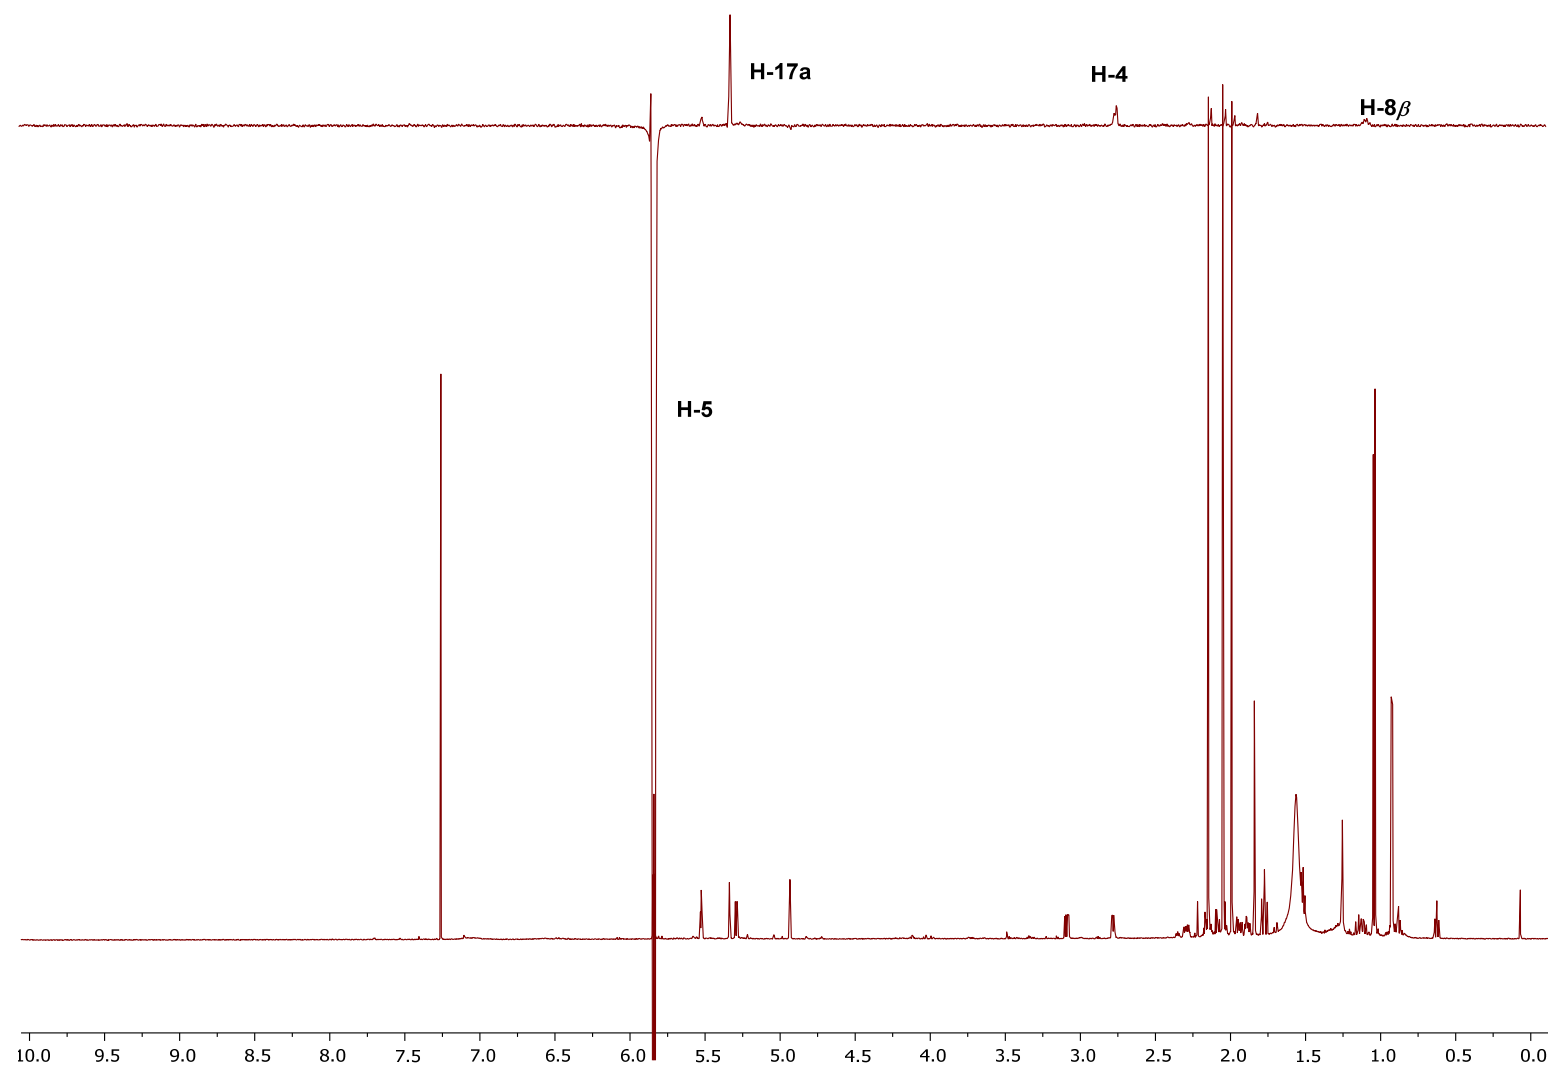

**Figure S33a.** 1D NOESY spectrum of compound **6**.

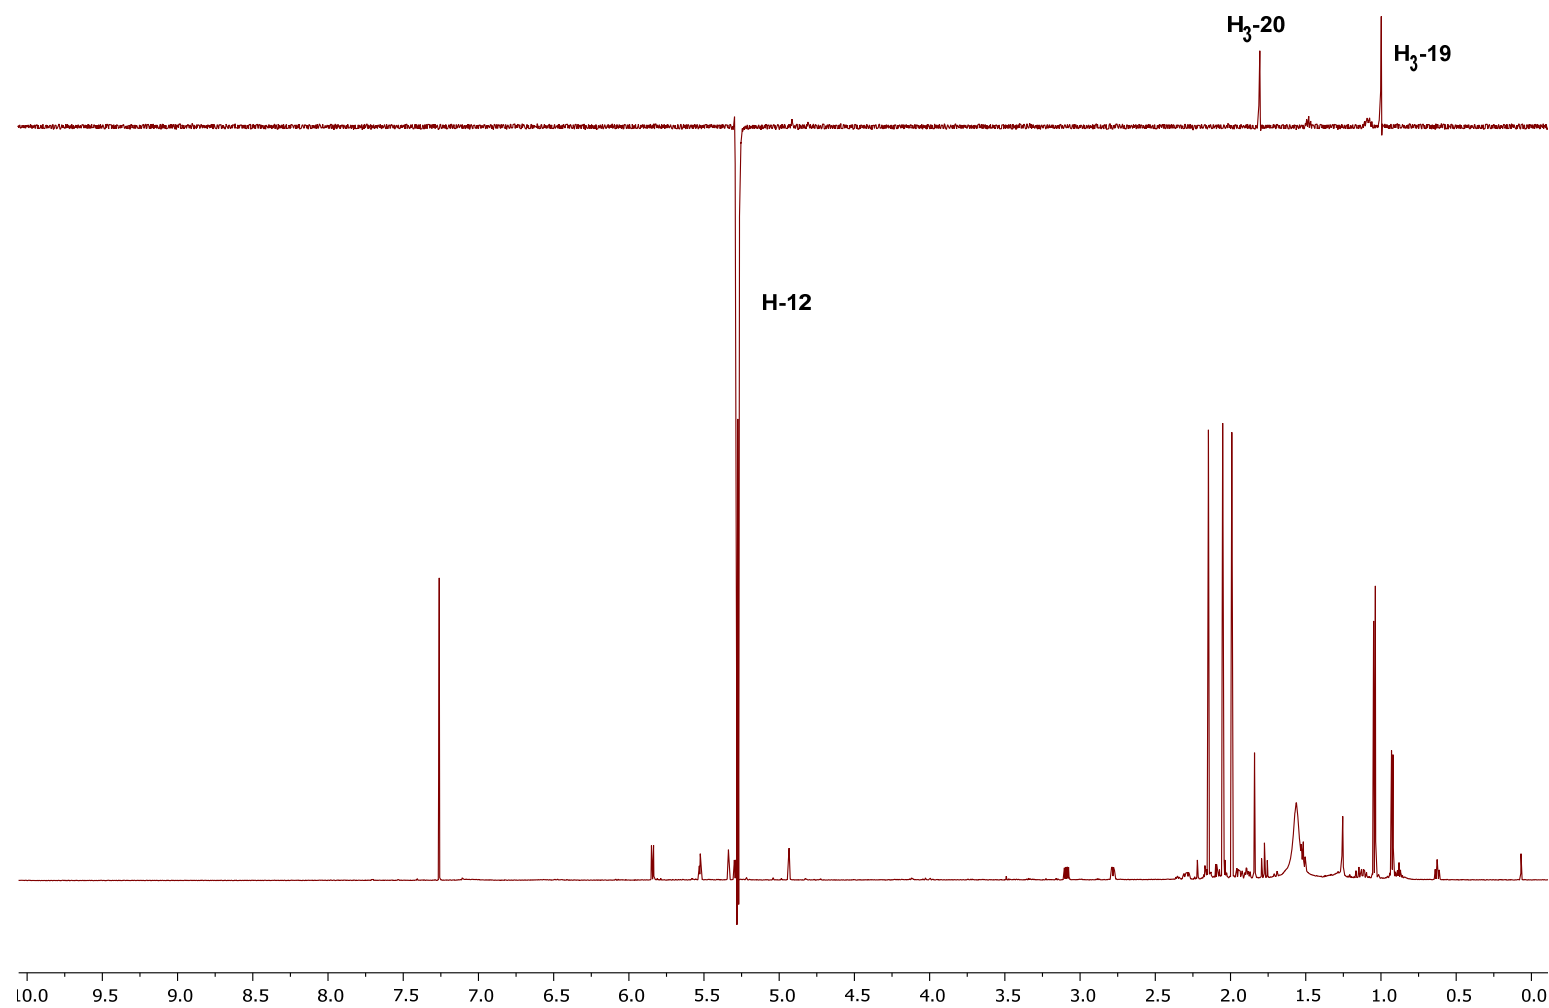

**Figure S33b.** 1D NOESY spectrum of compound **6**.

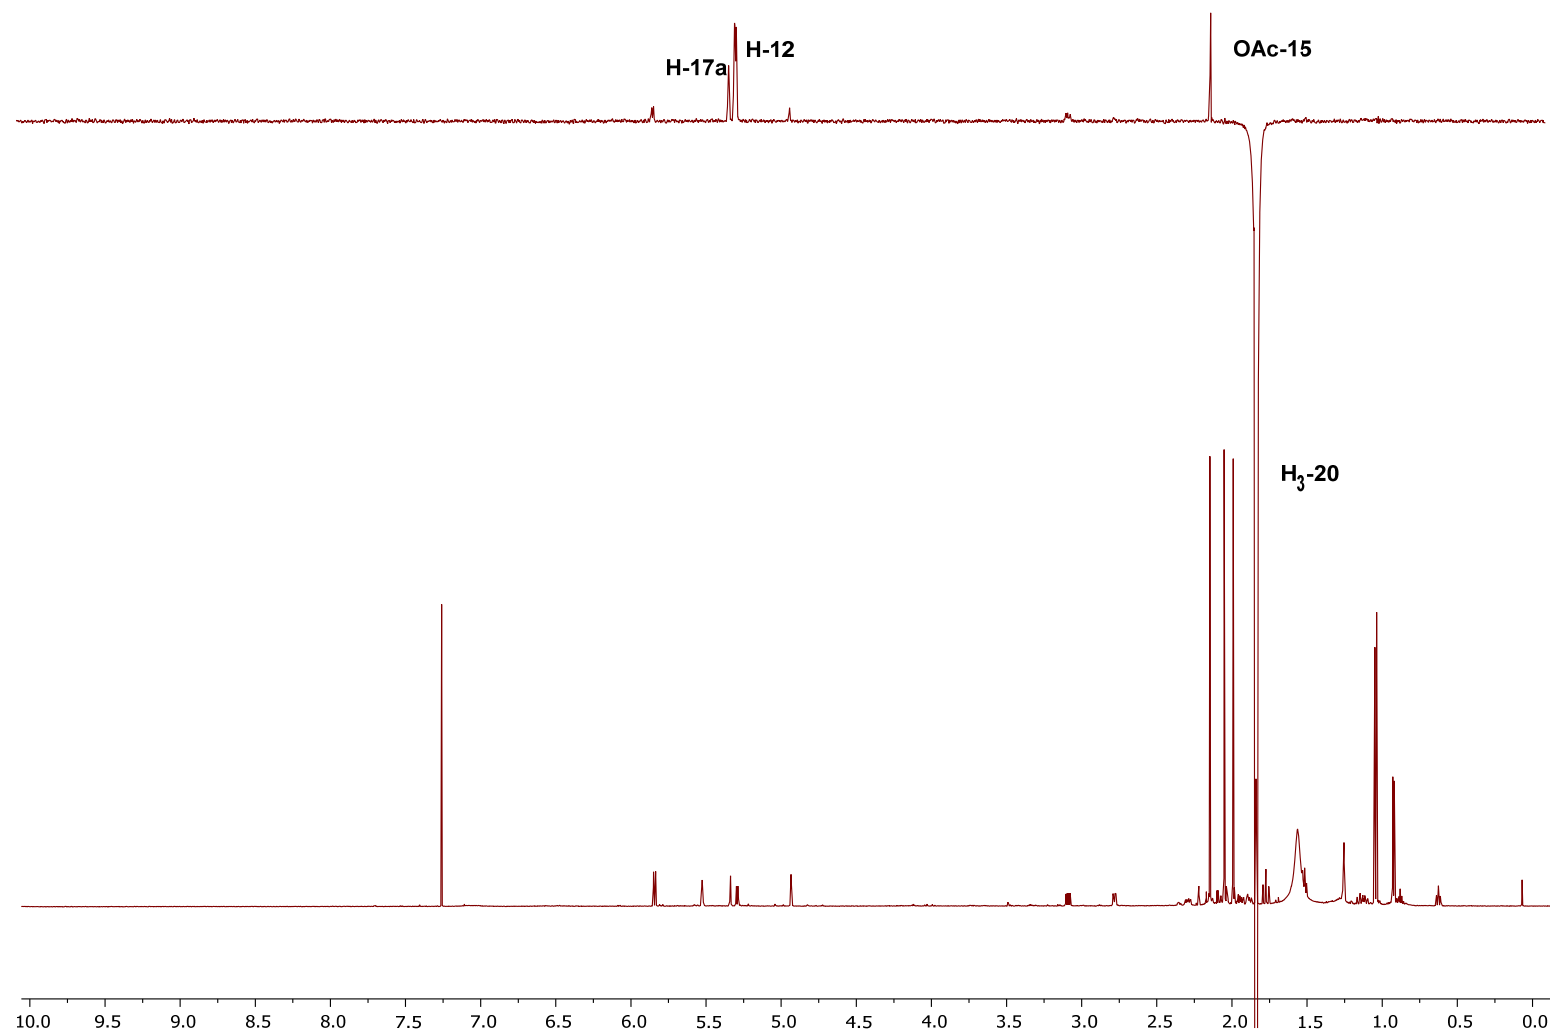

**Figure S33c.** 1D NOESY spectrum of compound **6**.



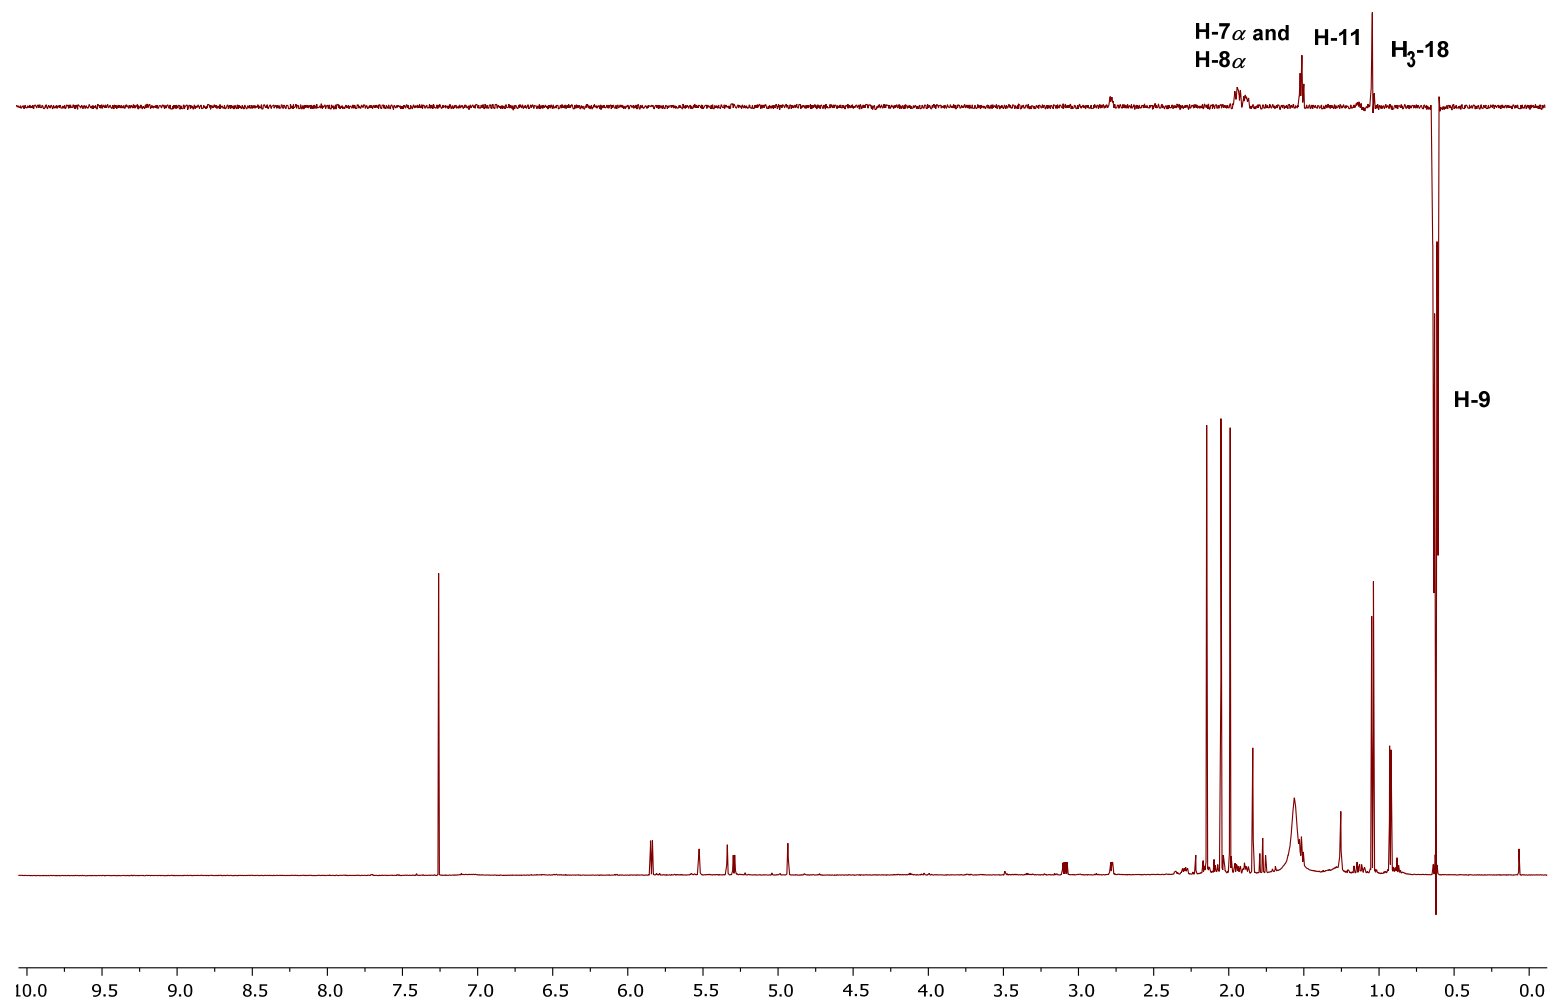

**Figure S33d.** 1D NOESY spectrum of compound **6**.

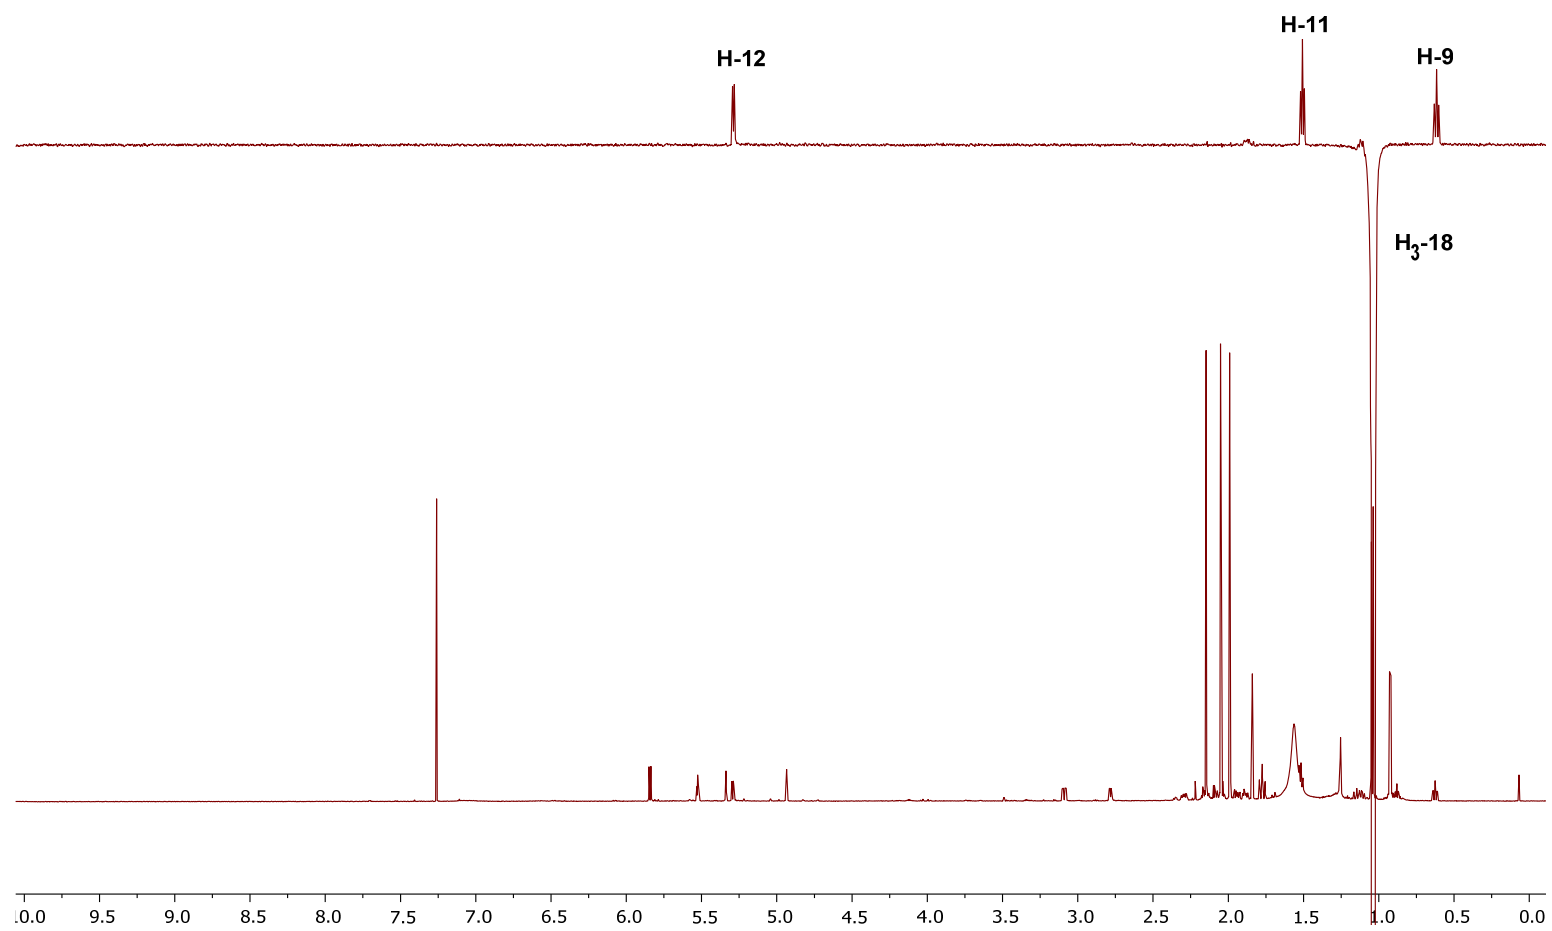

**Figure S33e.** 1D NOESY spectrum of compound **6**.

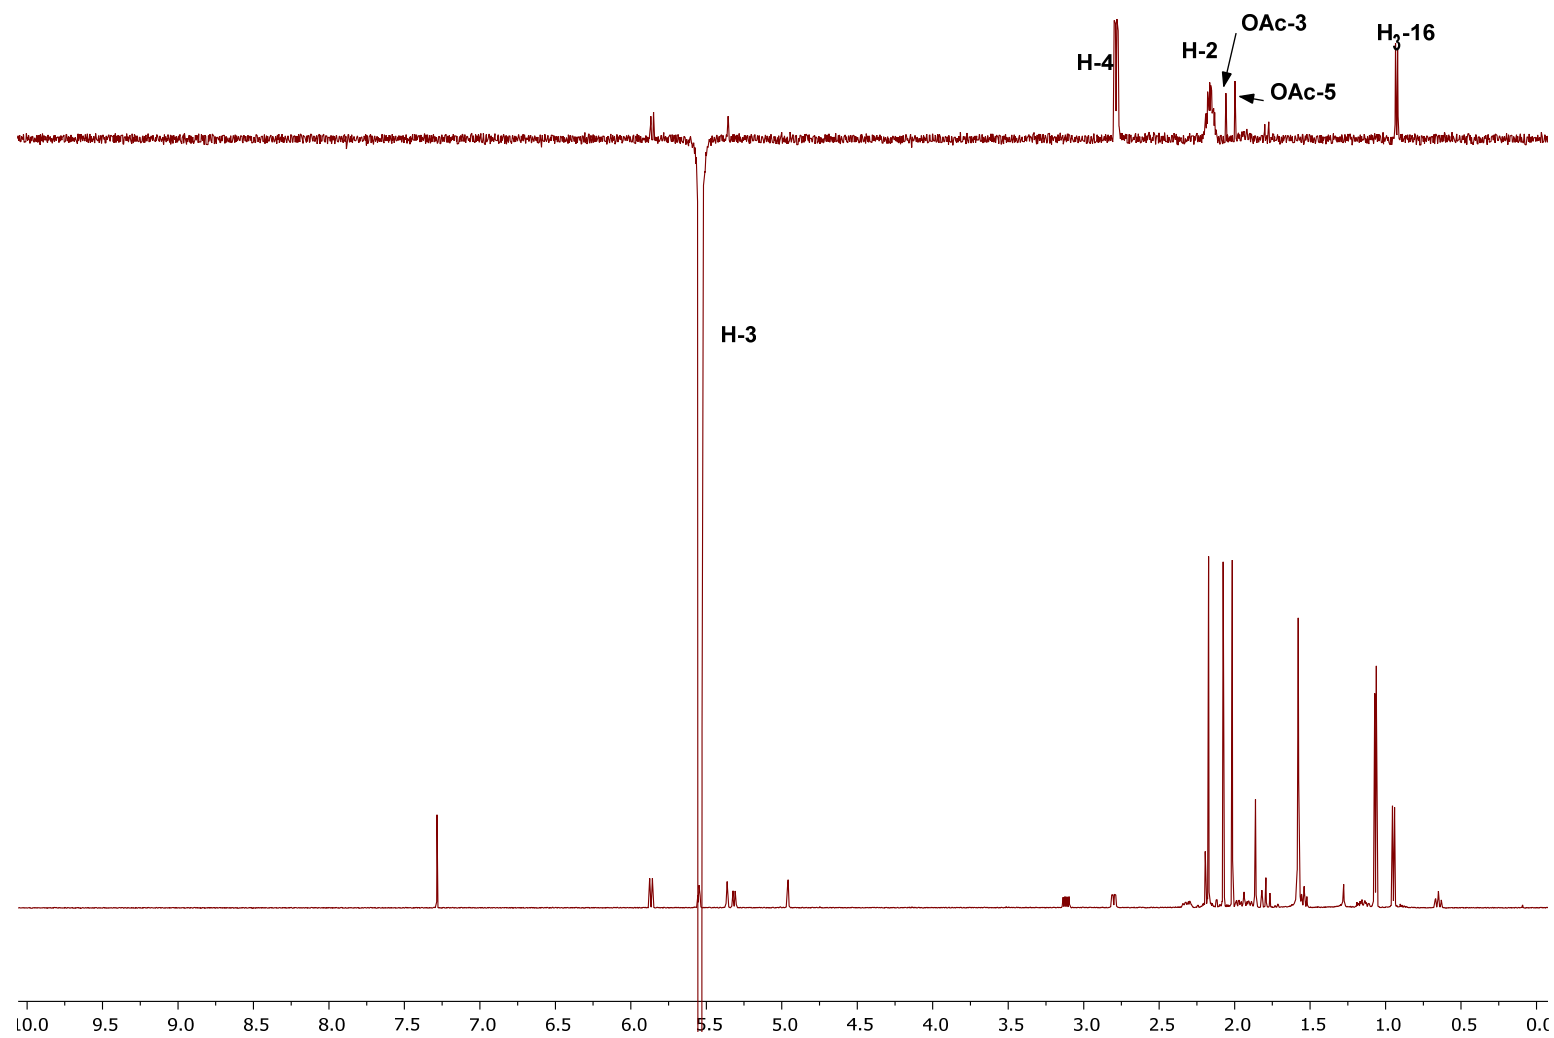

**Figure S33f.** 1D NOESY spectrum of compound **6**.

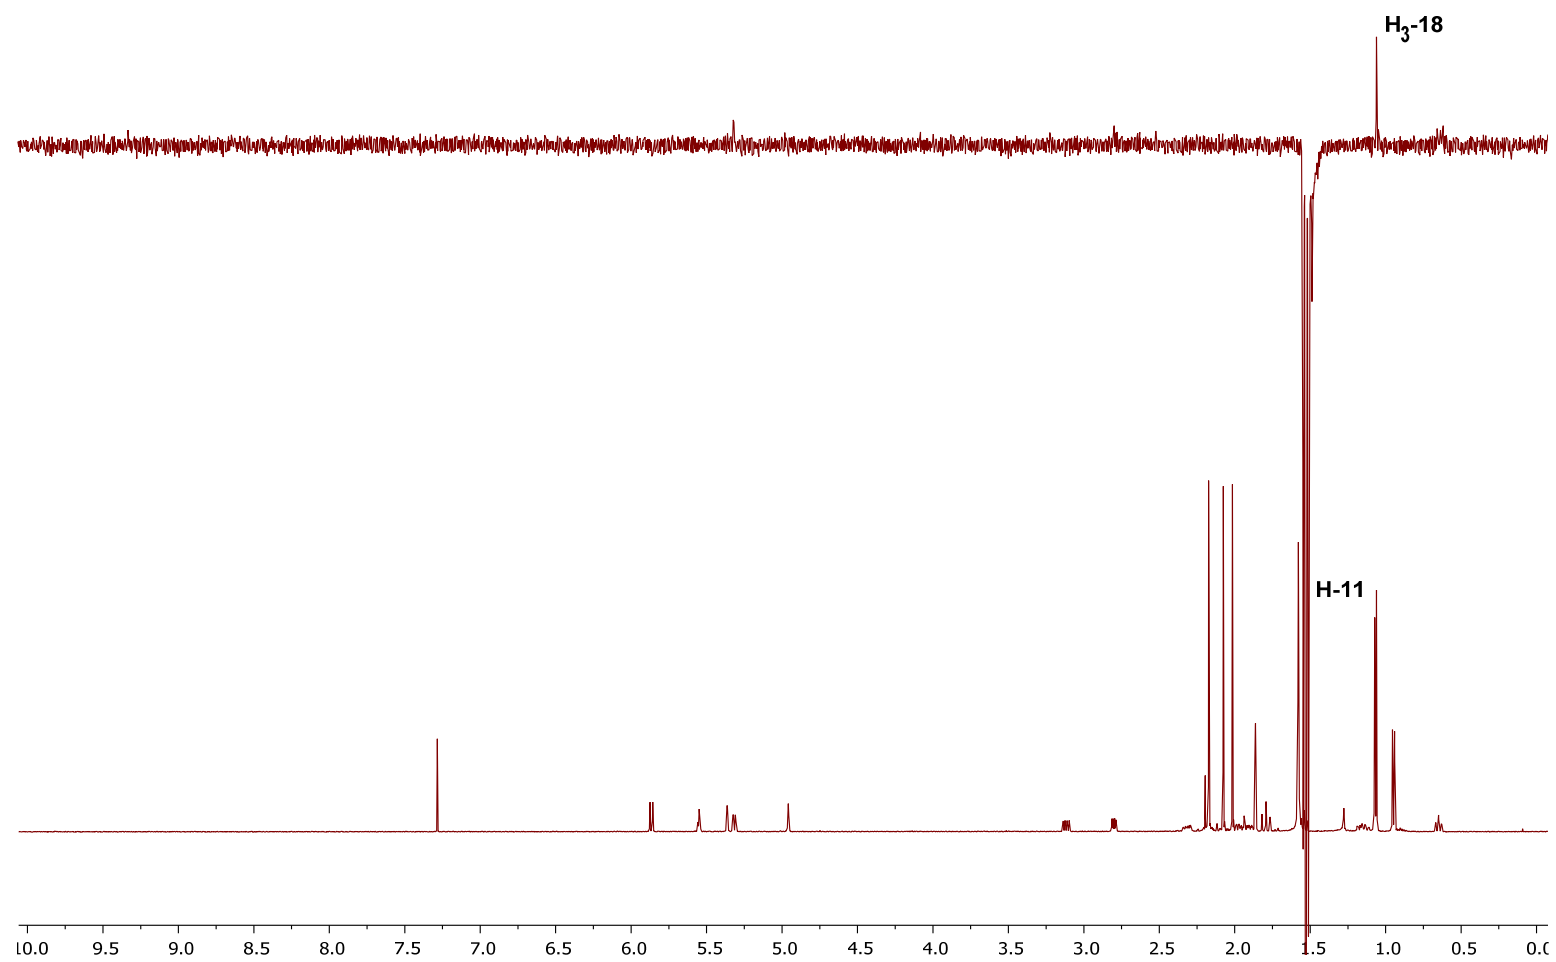

Figure S33g. 1D NOESY spectrum of compound 6.

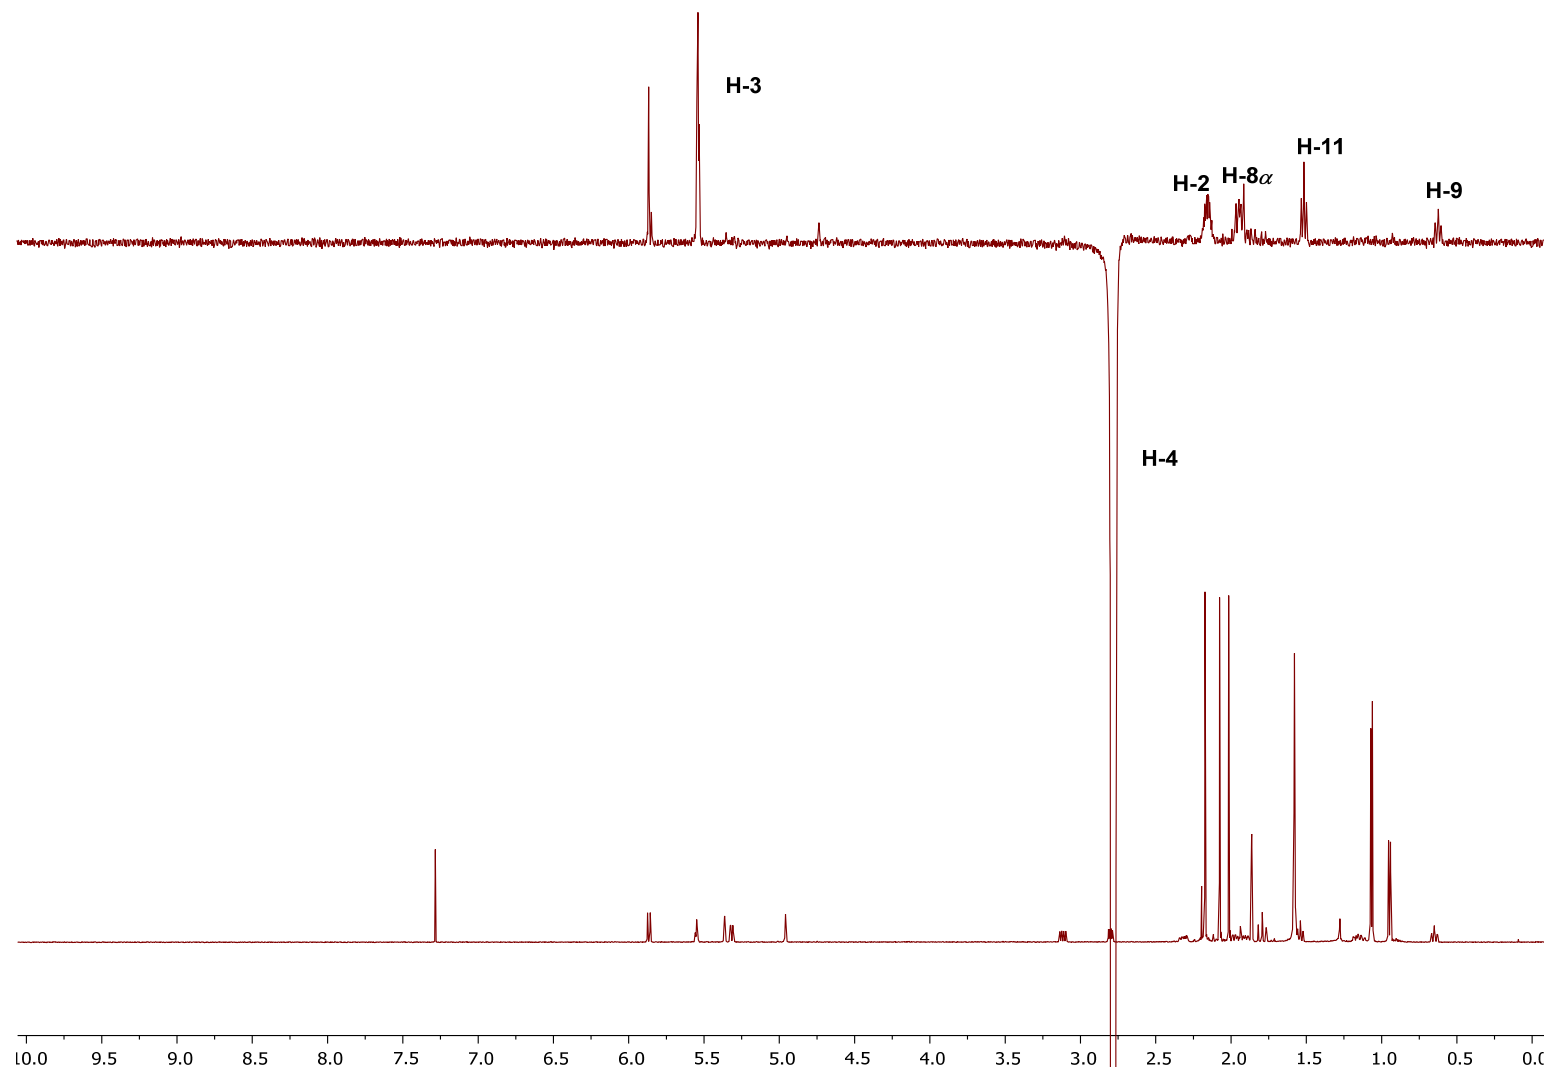

Figure S33h. 1D NOESY spectrum of compound 6.

## Elemental Composition Report

## Single Mass Analysis

Tolerance = 5.0 mDa / DBE: min = -1.5, max = 80.0

Element prediction: Off

Number of isotope peaks used for i-FIT = 5

Monoisotopic Mass, Even Electron Ions

93 formula(e) evaluated with 3 results within limits (all results (up to 1000) for each mass)

Elements Used:

C: 0-30 H: 0-50 O: 0-15 <sup>23</sup>Na: 0-1

FEM-253 520 (4.808)

1: TOF MS ES+  
6.86e+005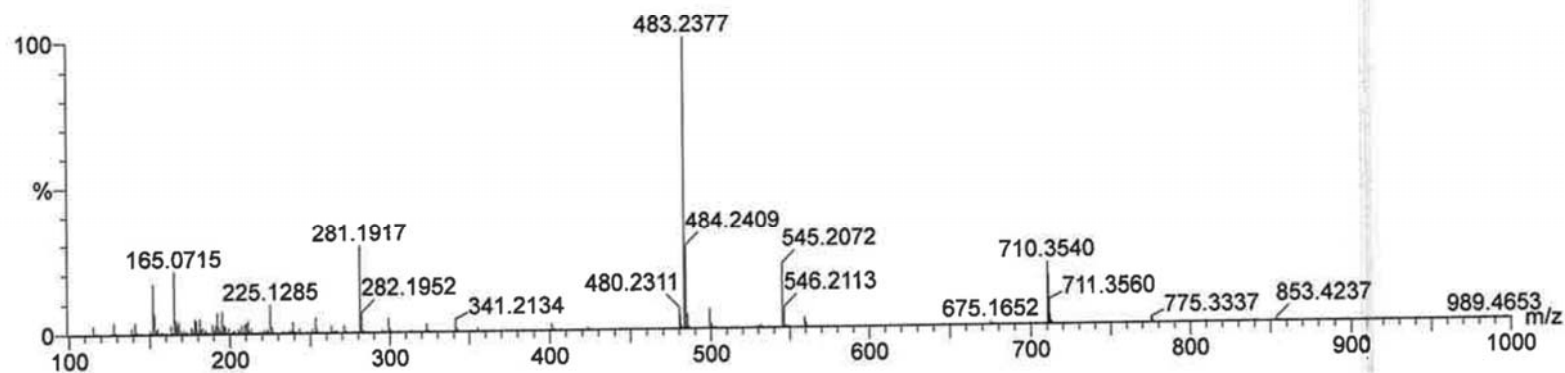

Minimum: -1.5  
Maximum: 5.0 10.0 80.0

| Mass     | Calc. Mass | mDa  | PPM  | DBE  | i-FIT  | Norm  | Conf (%) | Formula                                                          |
|----------|------------|------|------|------|--------|-------|----------|------------------------------------------------------------------|
| 483.2377 | 483.2359   | 1.8  | 3.7  | 8.5  | 1058.8 | 0.001 | 99.86    | C <sub>26</sub> H <sub>36</sub> O <sub>7</sub> <sup>23</sup> Na  |
|          | 483.2383   | -0.6 | -1.2 | 11.5 | 1065.4 | 6.598 | 0.14     | C <sub>28</sub> H <sub>35</sub> O <sub>7</sub>                   |
|          | 483.2417   | -4.0 | -8.3 | -0.5 | 1068.7 | 9.859 | 0.01     | C <sub>19</sub> H <sub>40</sub> O <sub>12</sub> <sup>23</sup> Na |

Figure S34. HRMS of compound 6.

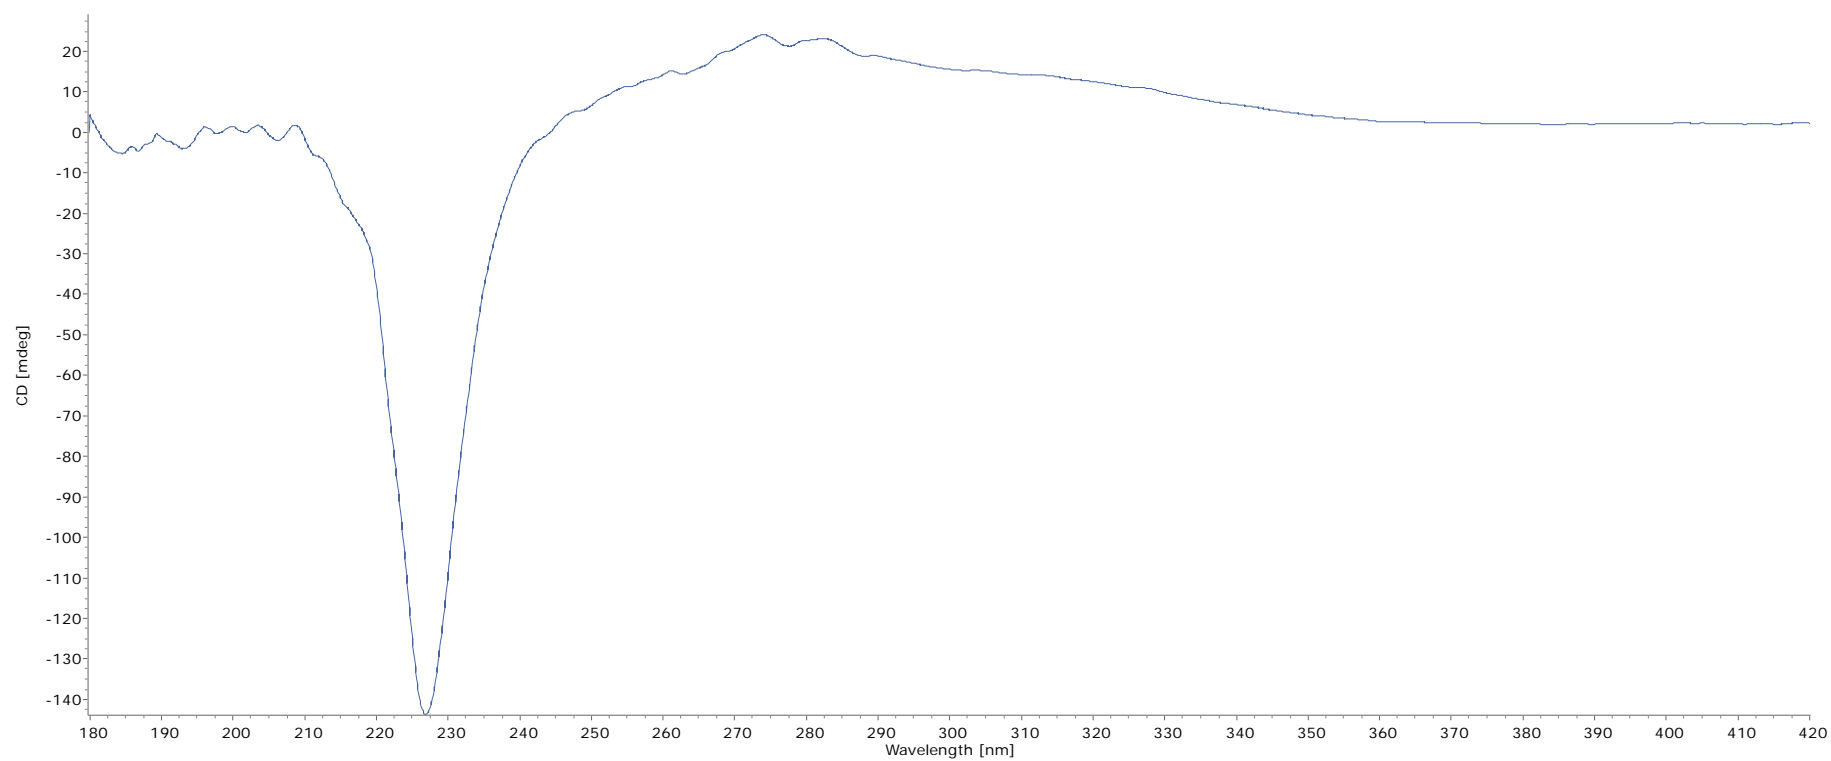

**Figure S35.** ECD of compound **6**.

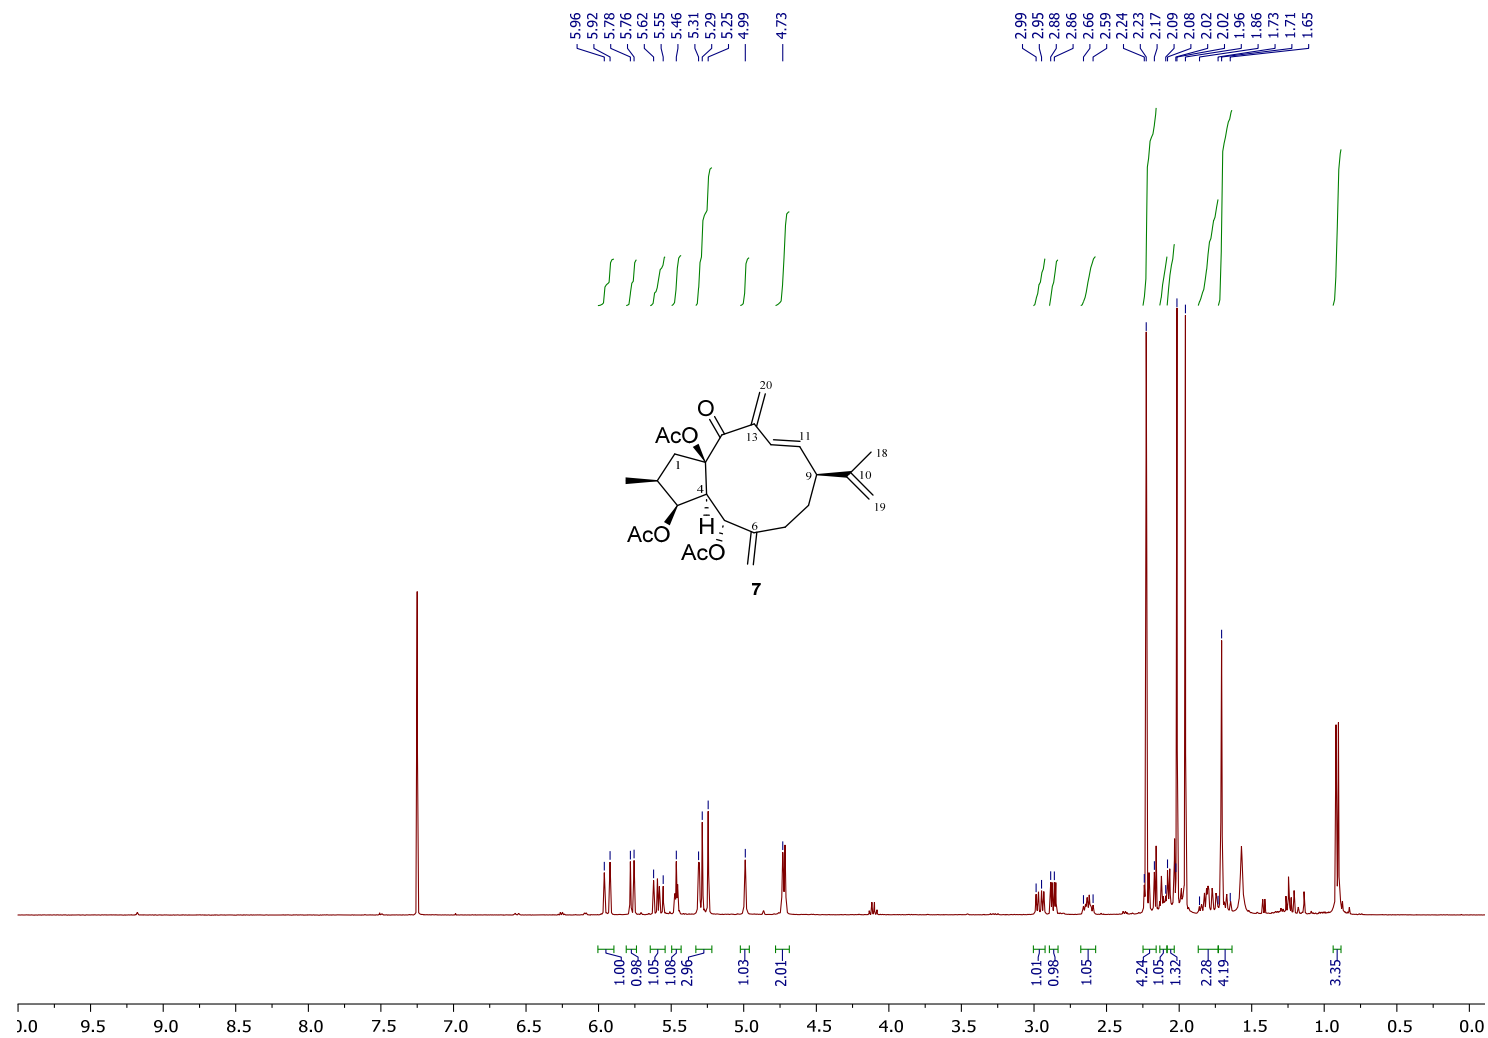

Figure S36. <sup>1</sup>H NMR spectrum (400 MHz) of compound **7** in CDCl<sub>3</sub>.



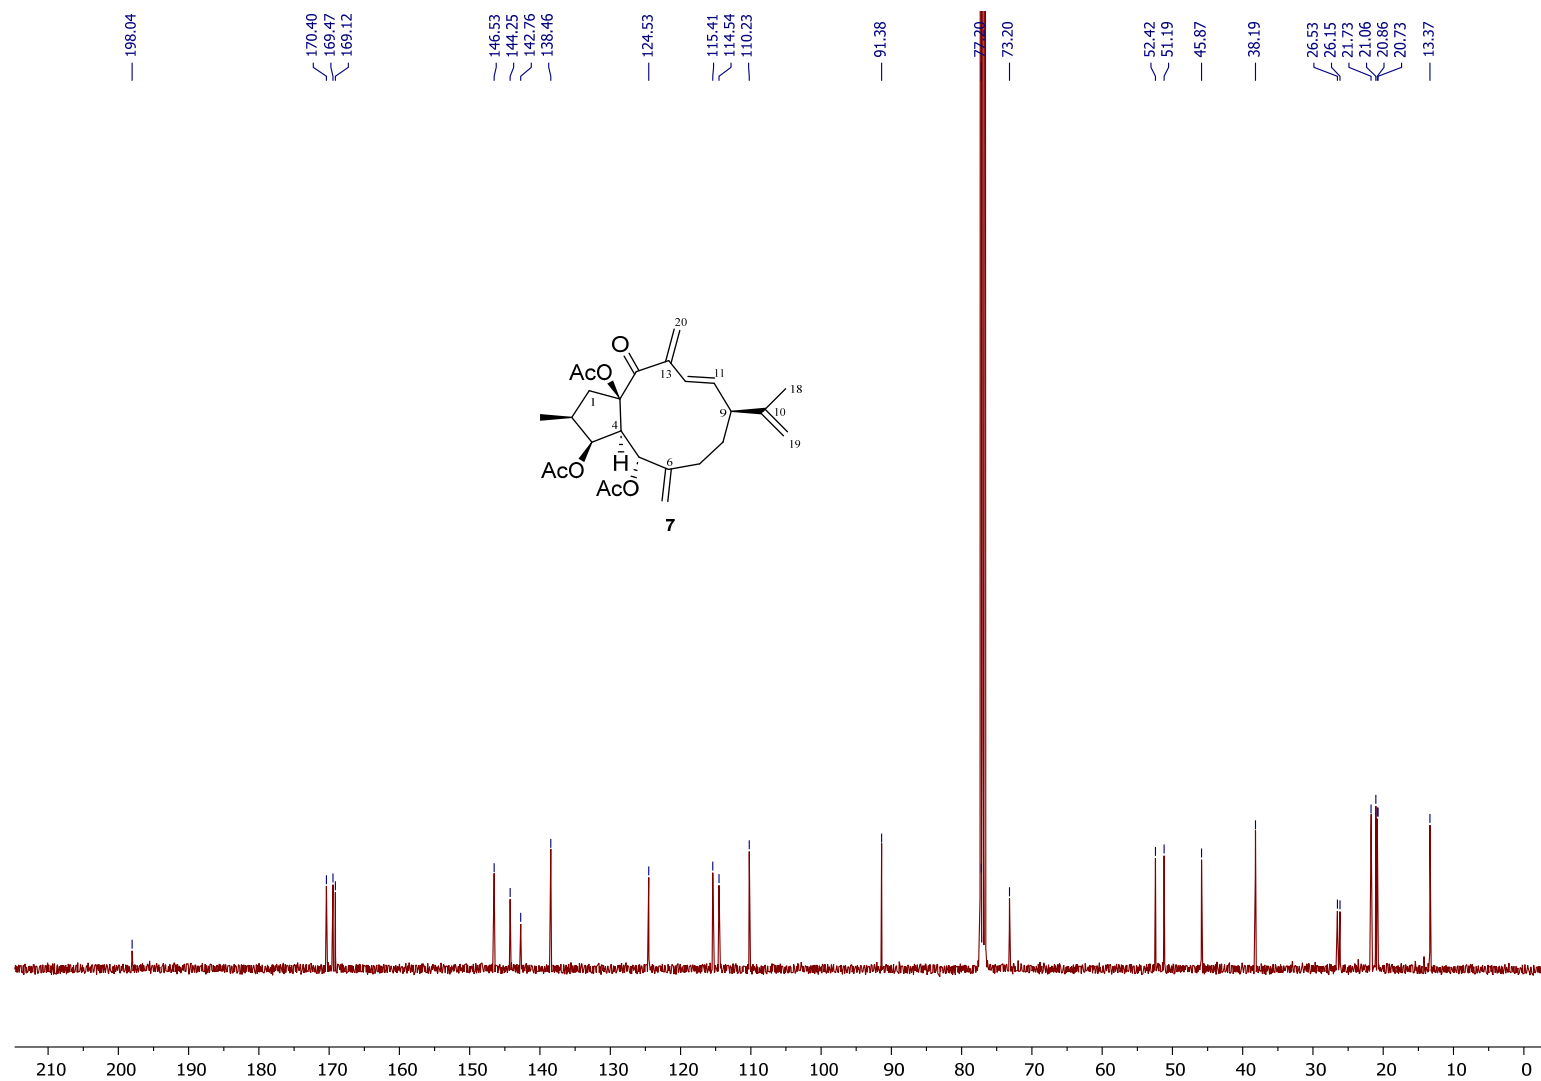

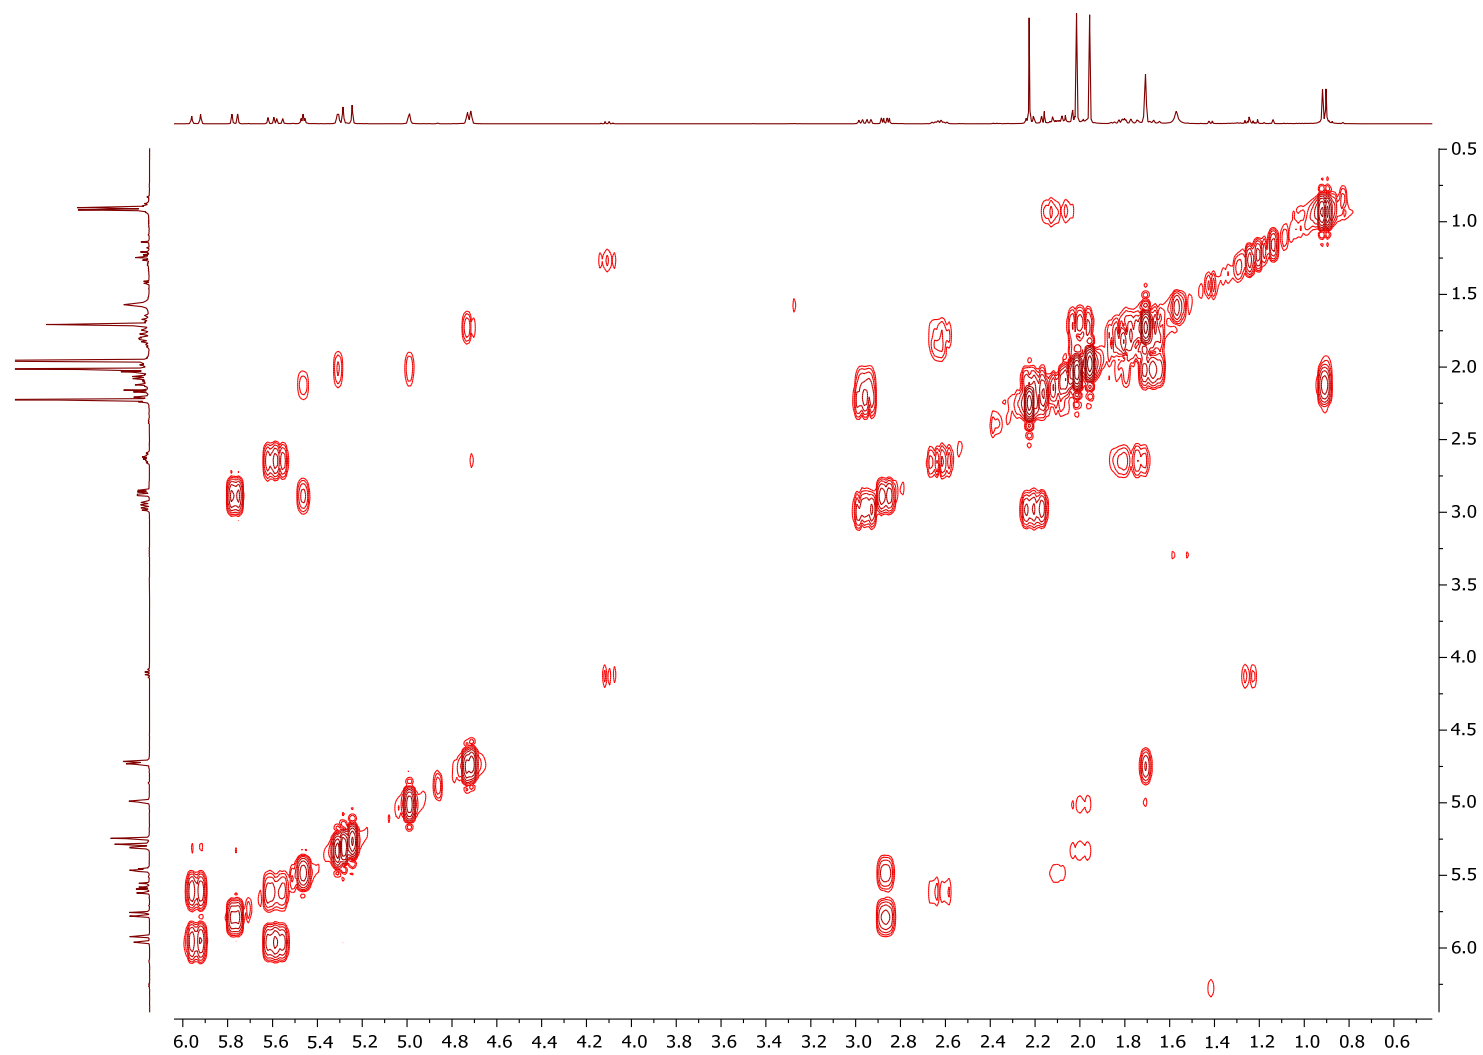

**Figure S38.** gCOSY spectrum of compound **7**.

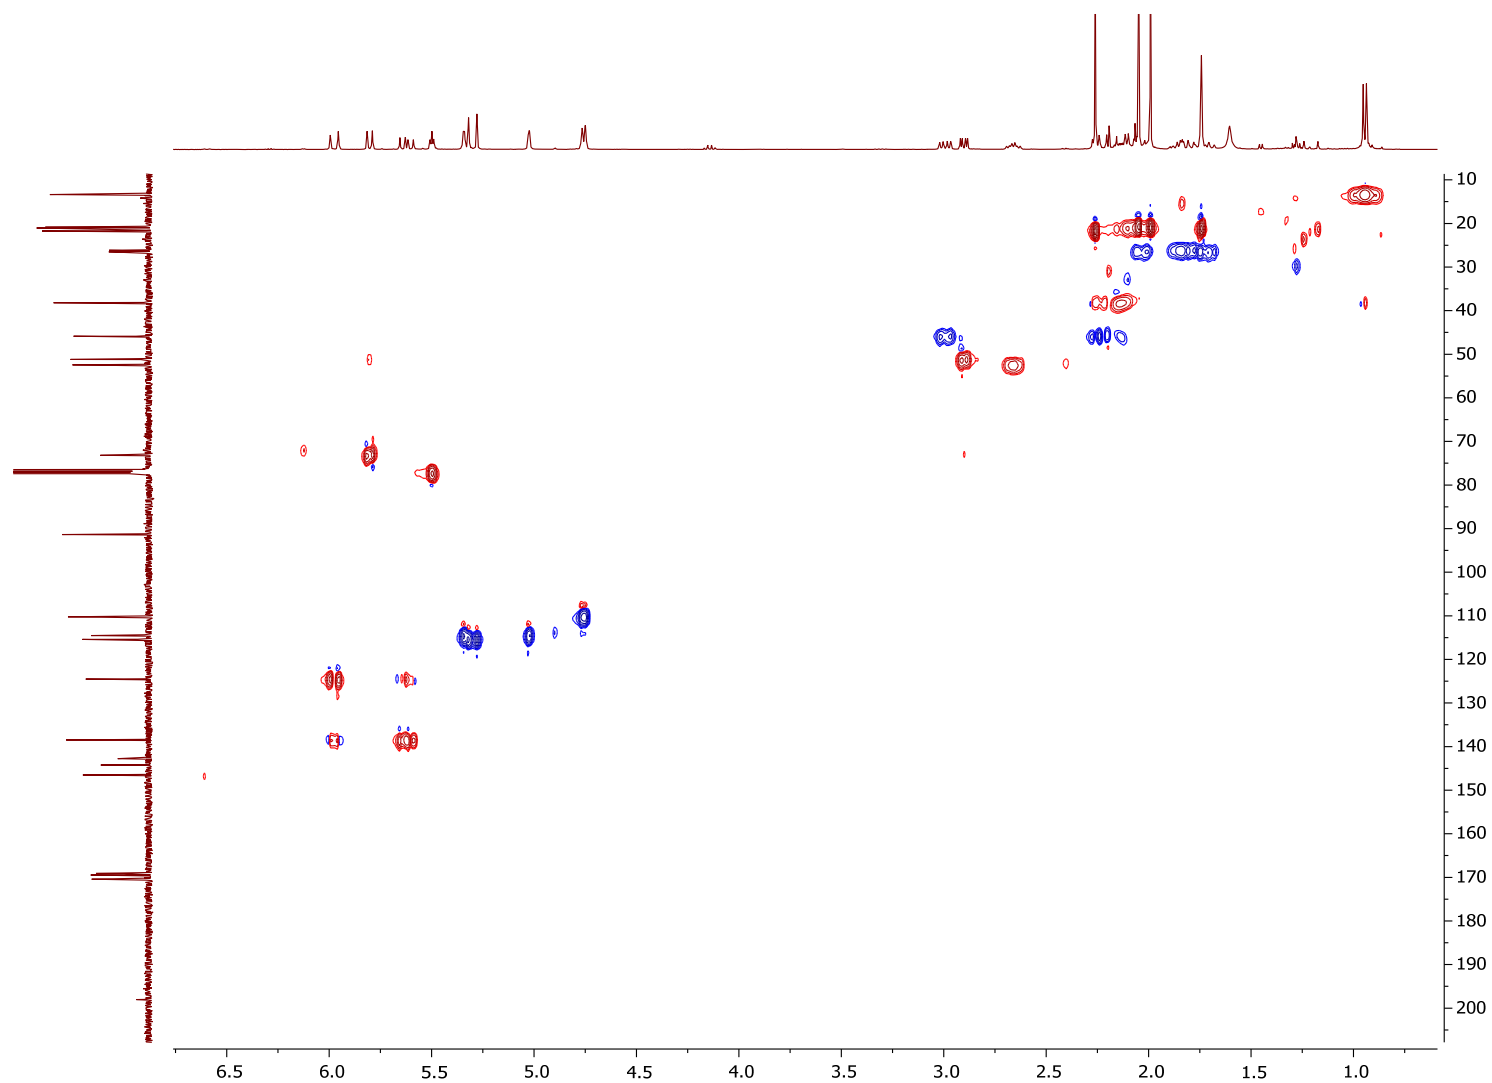

Figure S39. gHSQC spectrum of compound 7.

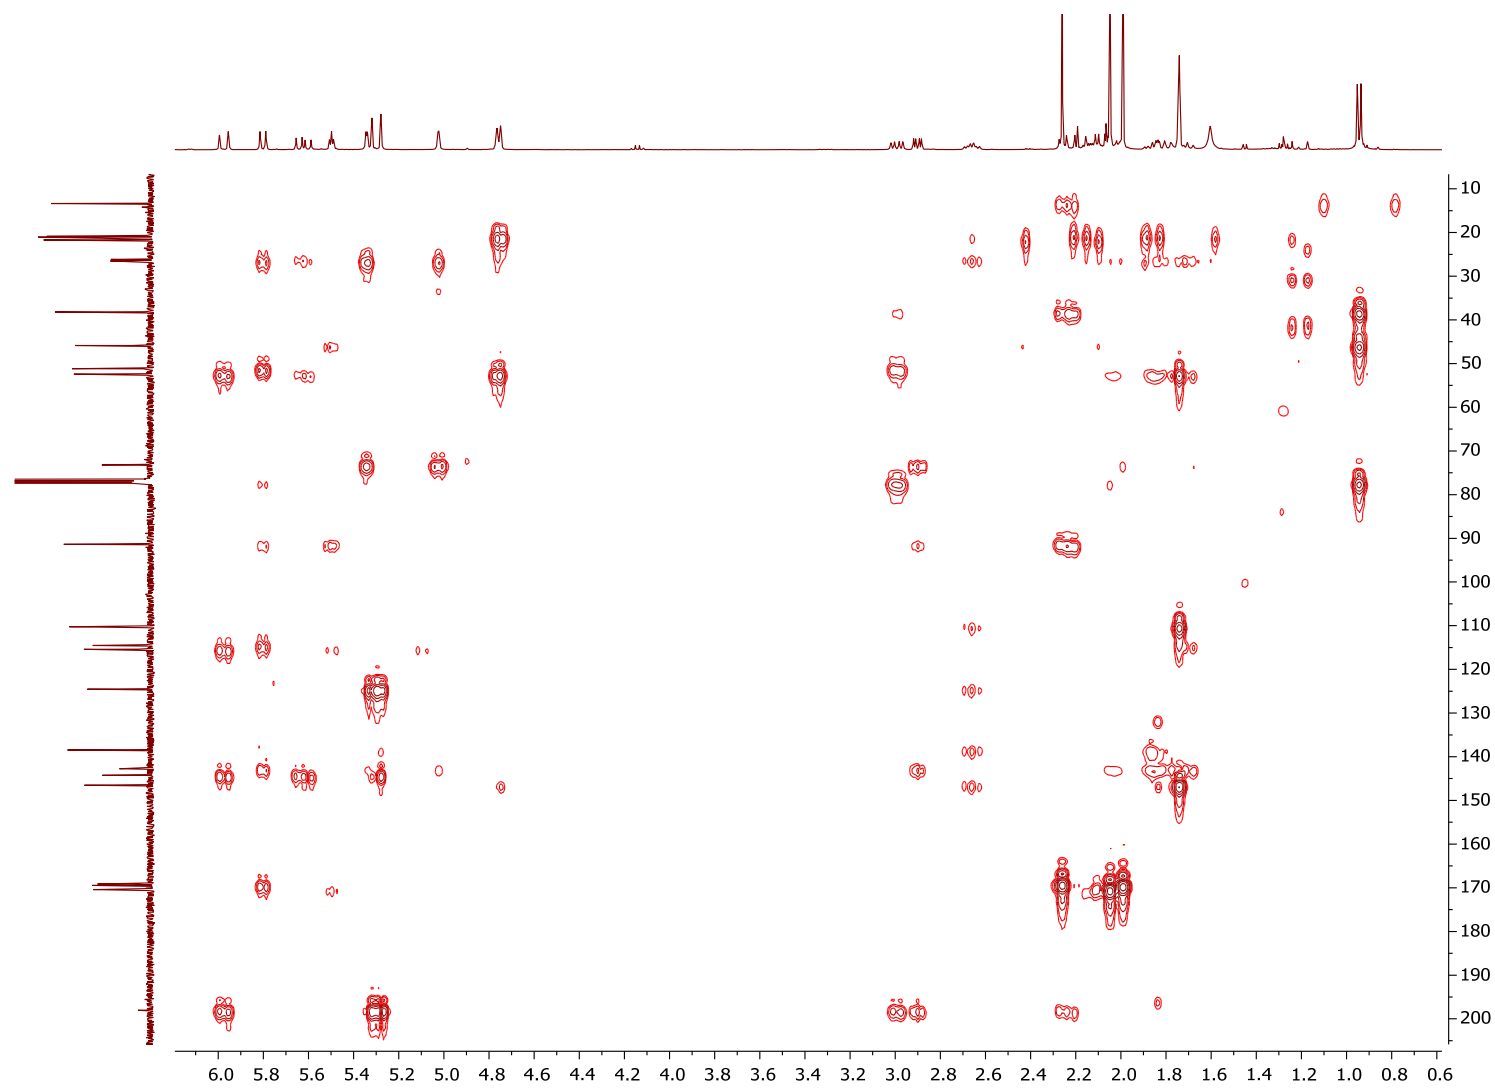

**Figure S40.** gHMBC spectrum of compound 7.

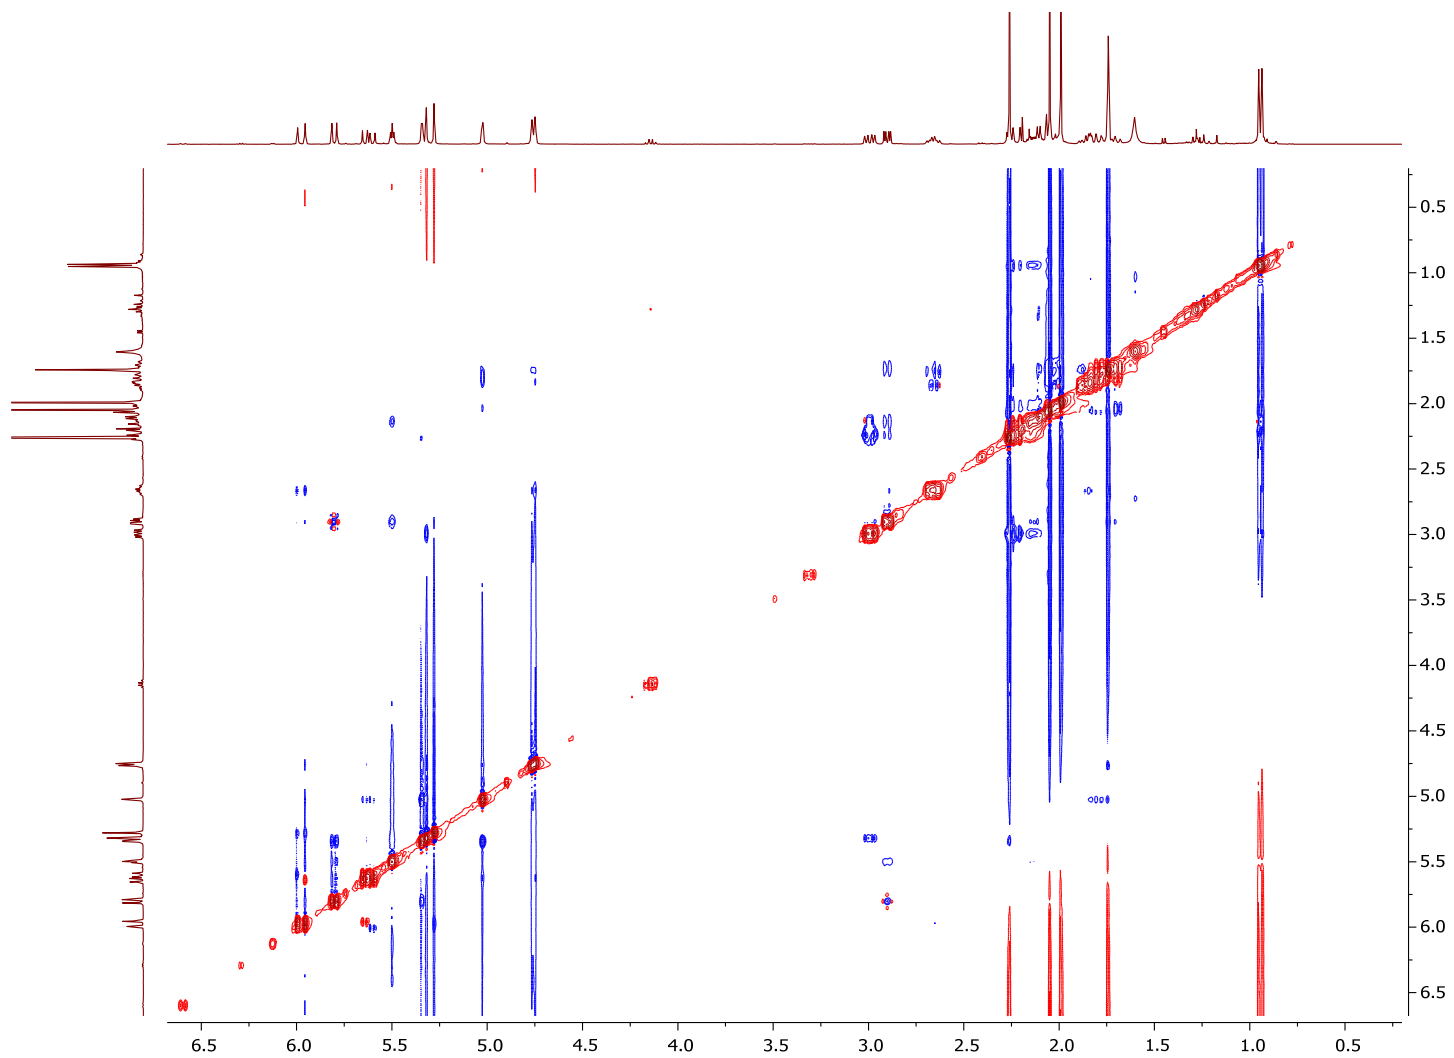

**Figure S41.** 2D NOESY spectrum of compound 7.

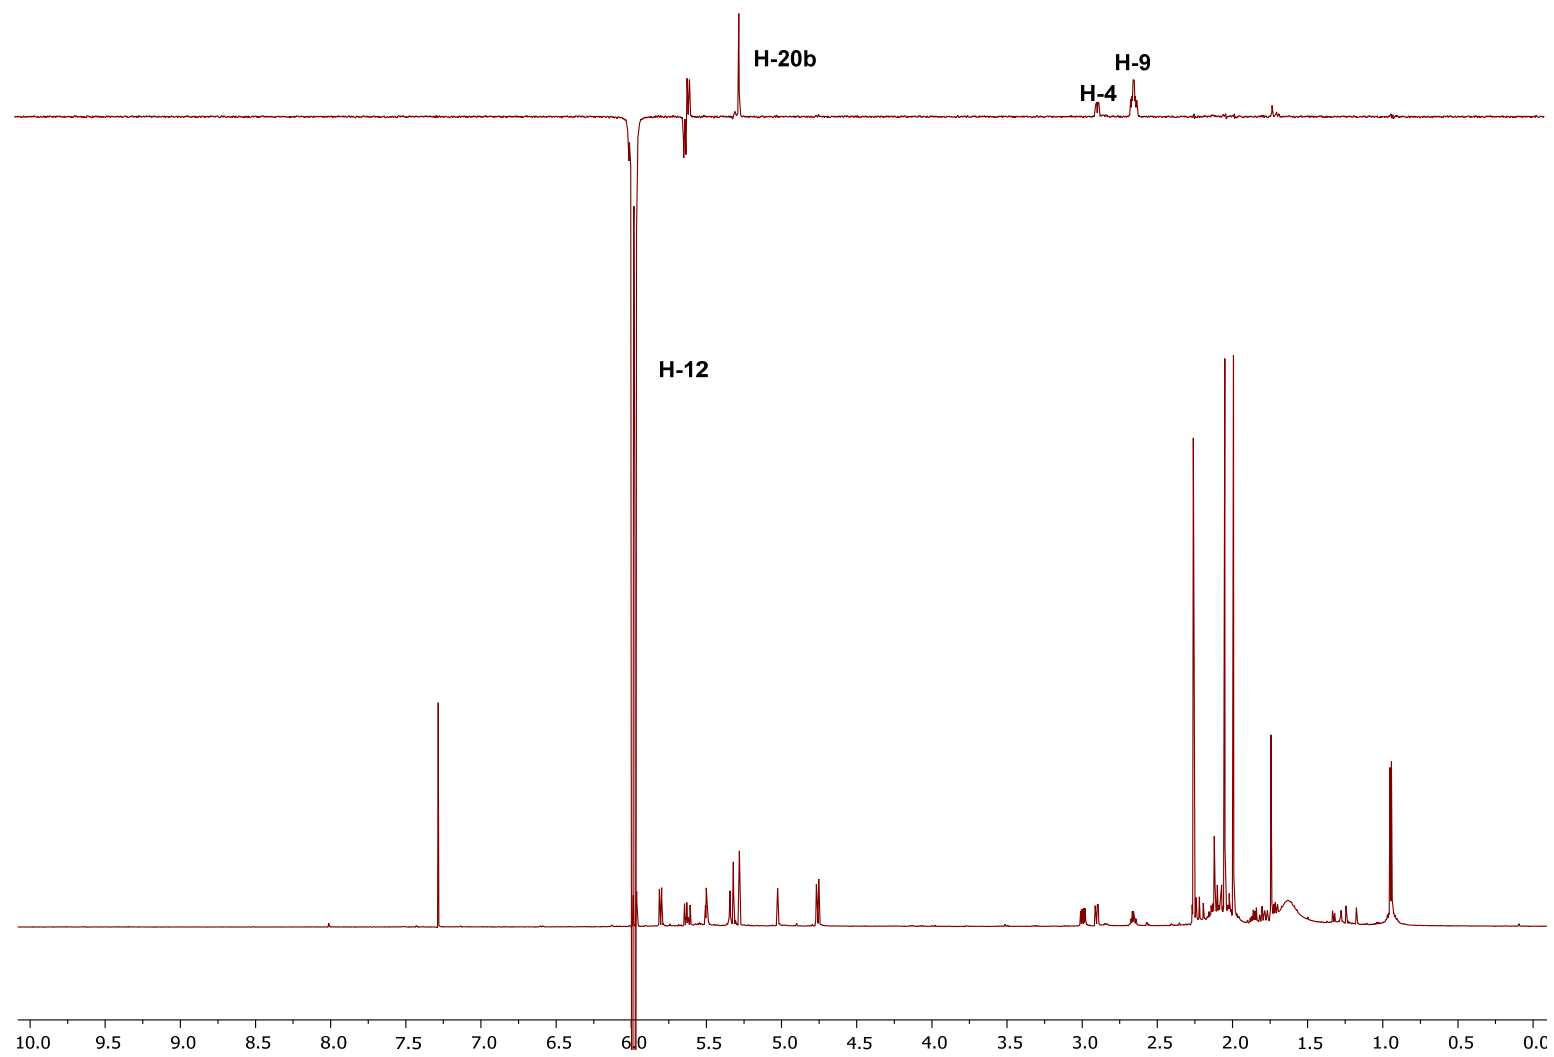

**Figure S42a.** 1D NOESY spectrum of compound 7.

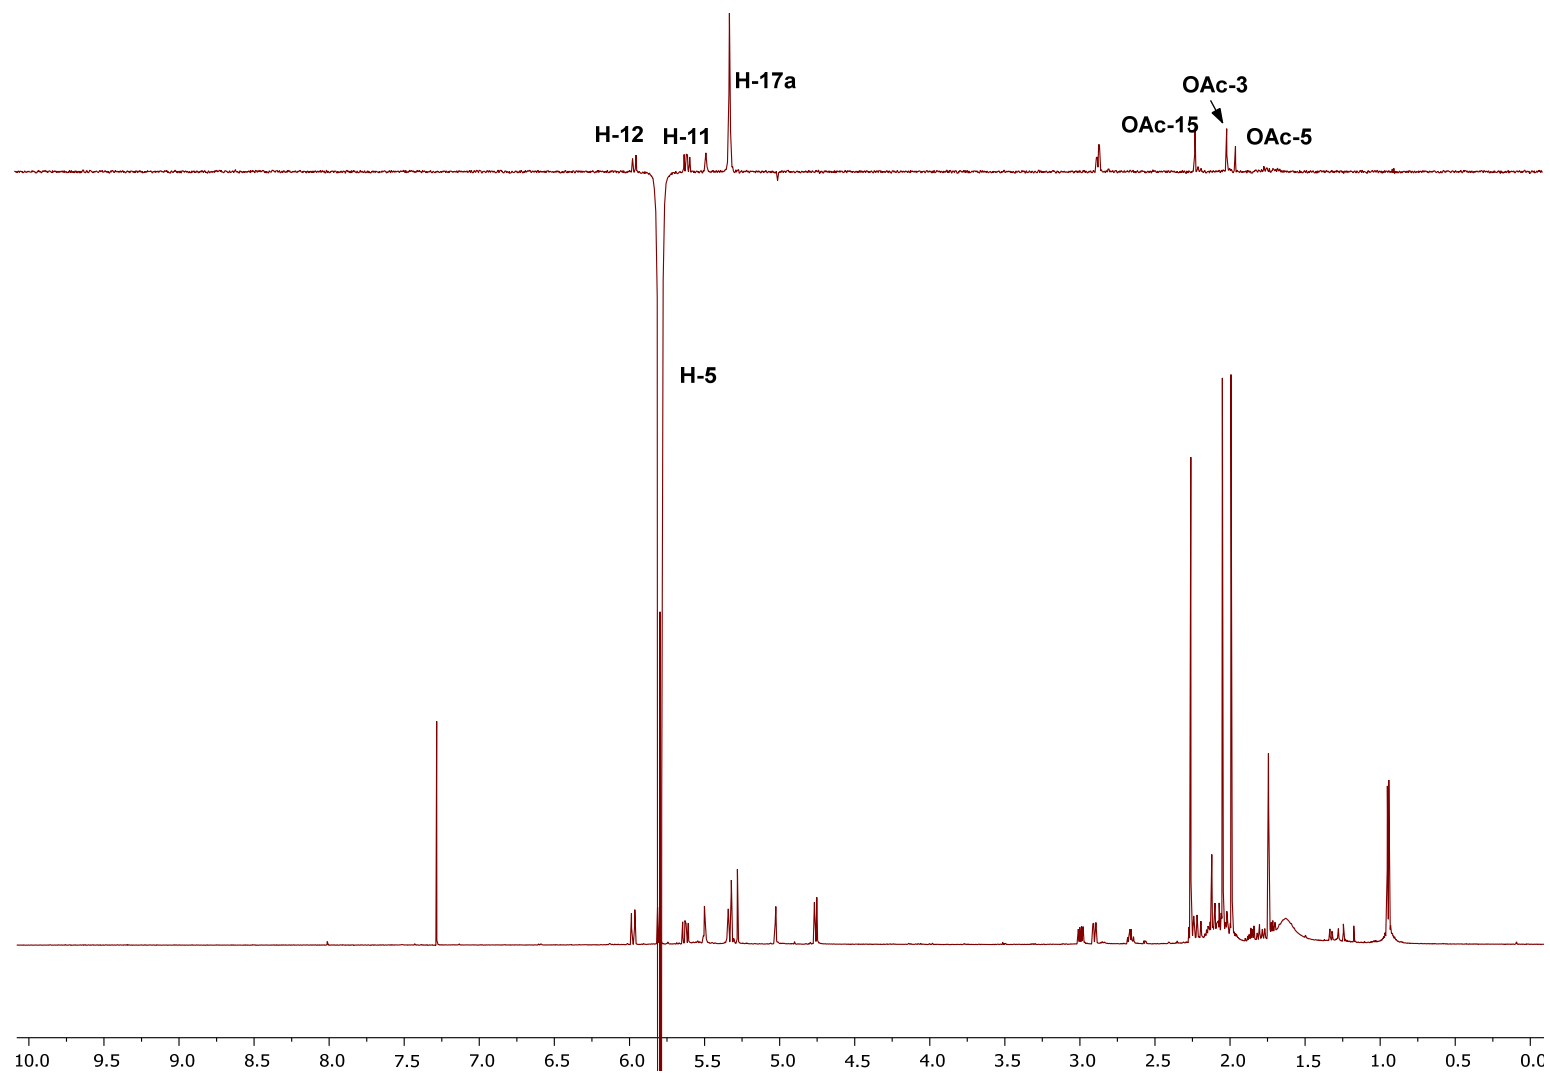

**Figure S42b.** 1D NOESY spectrum of compound 7.

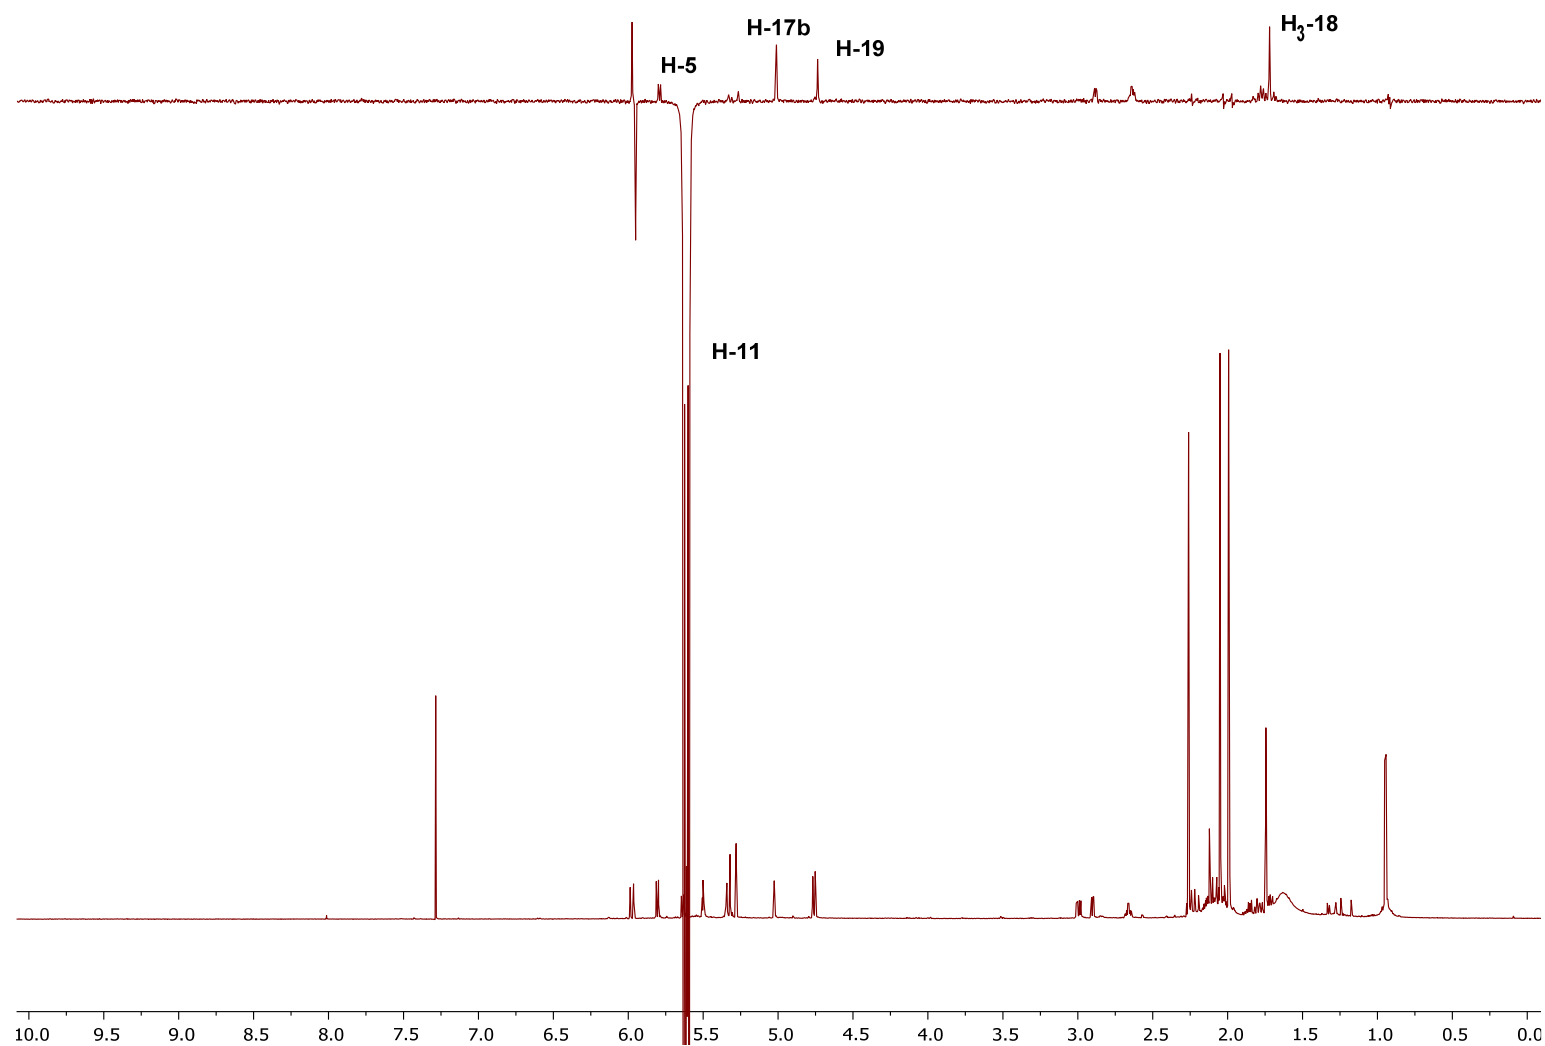

**Figure S42c.** 1D NOESY spectrum of compound 7.



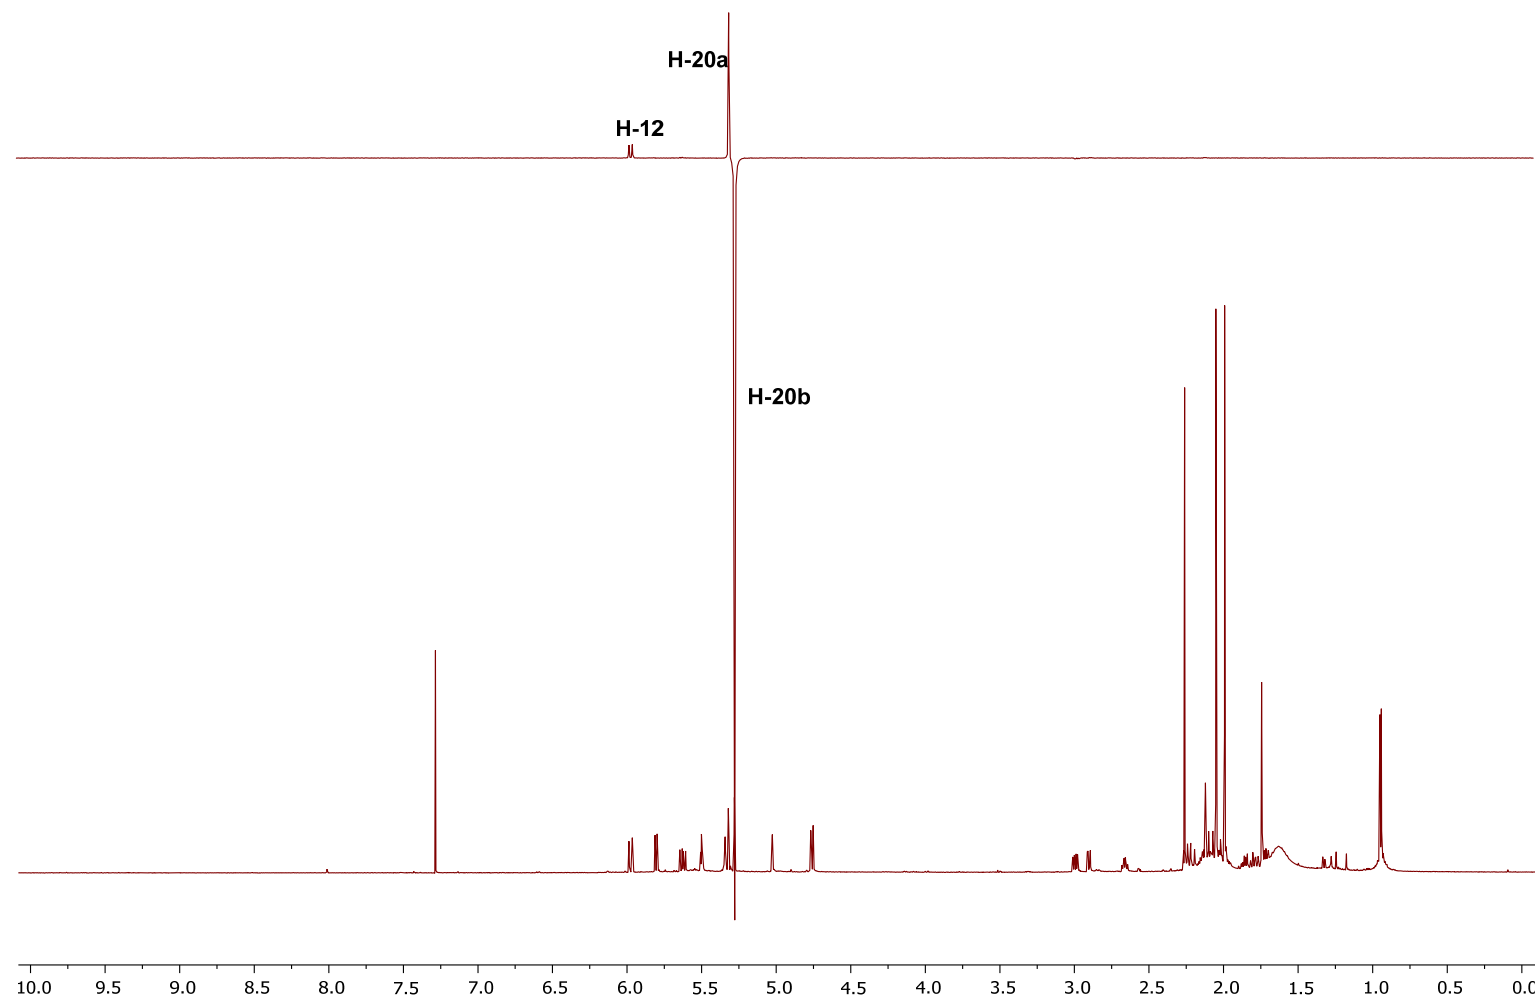

**Figure S42d.** 1D NOESY spectrum of compound 7.

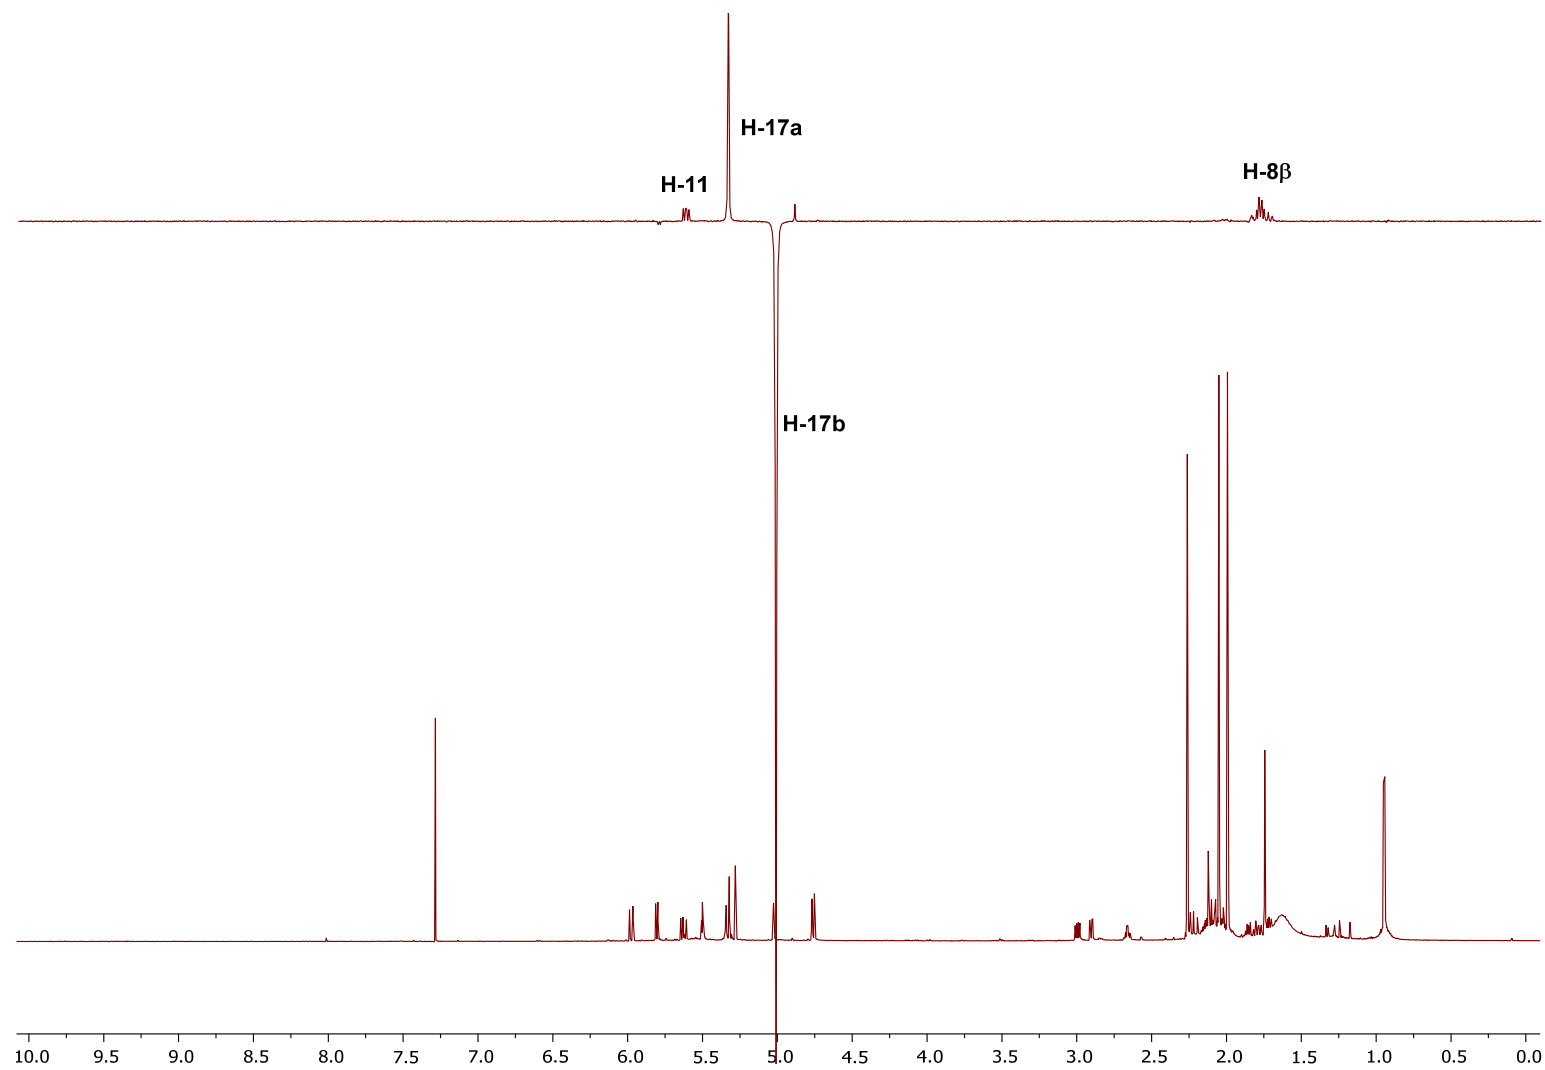

**Figure S42e.** 1D NOESY spectrum of compound 7.

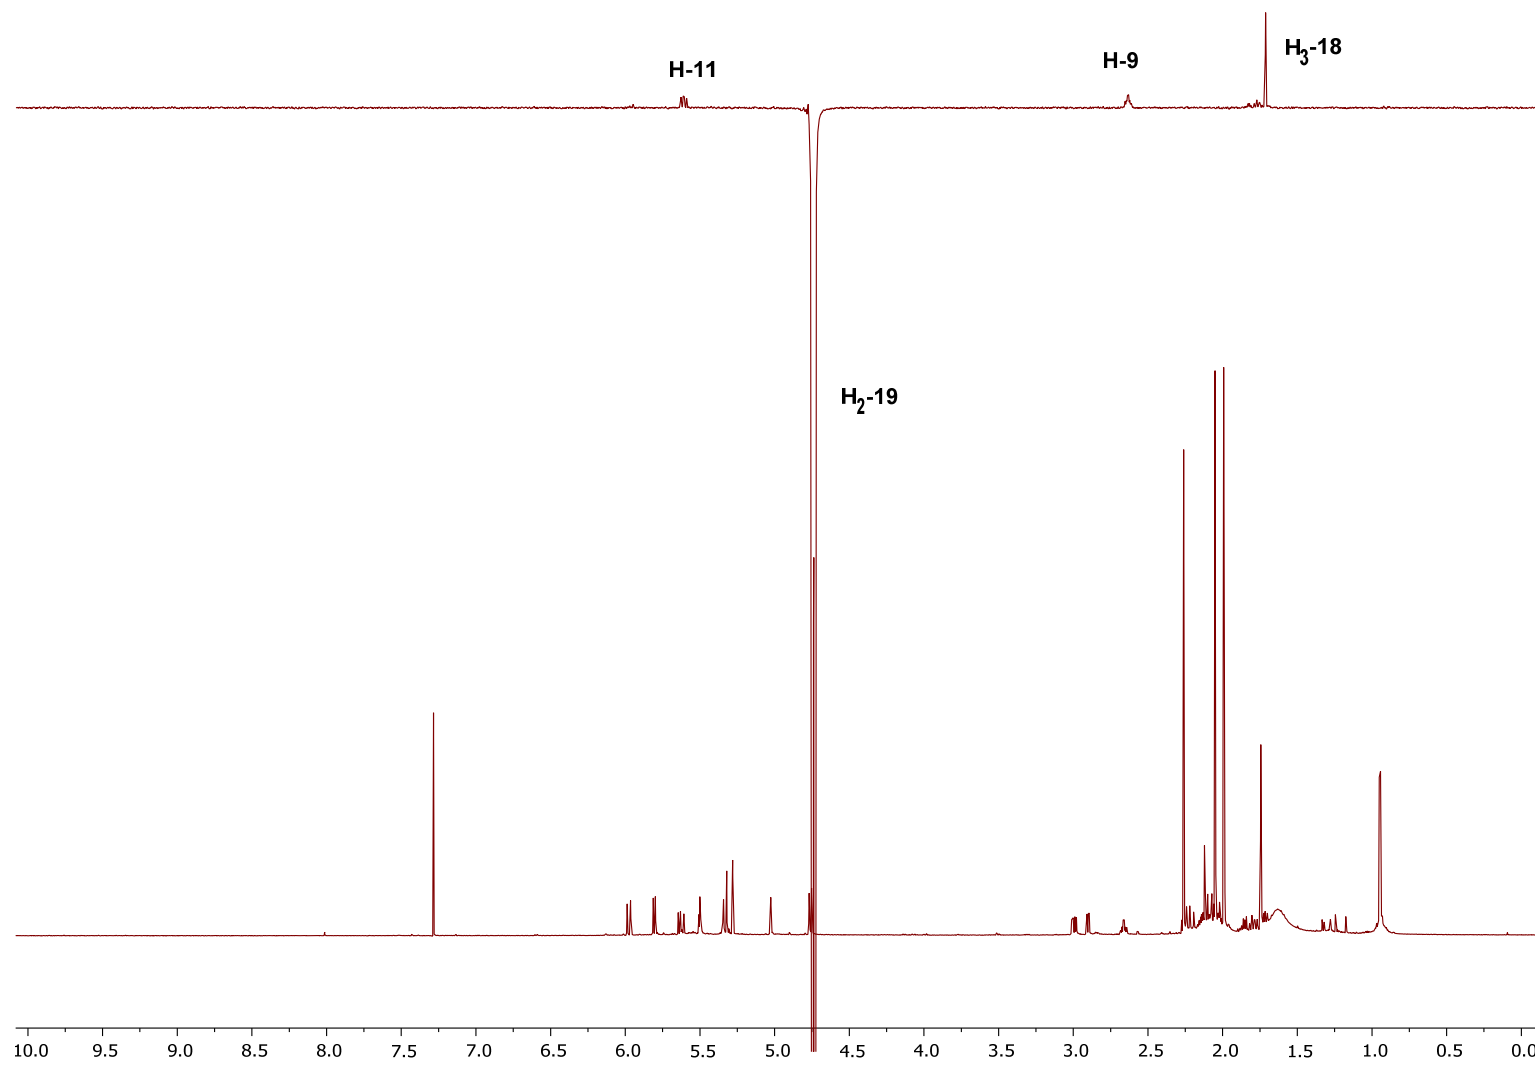

**Figure S42f.** 1D NOESY spectrum of compound 7.

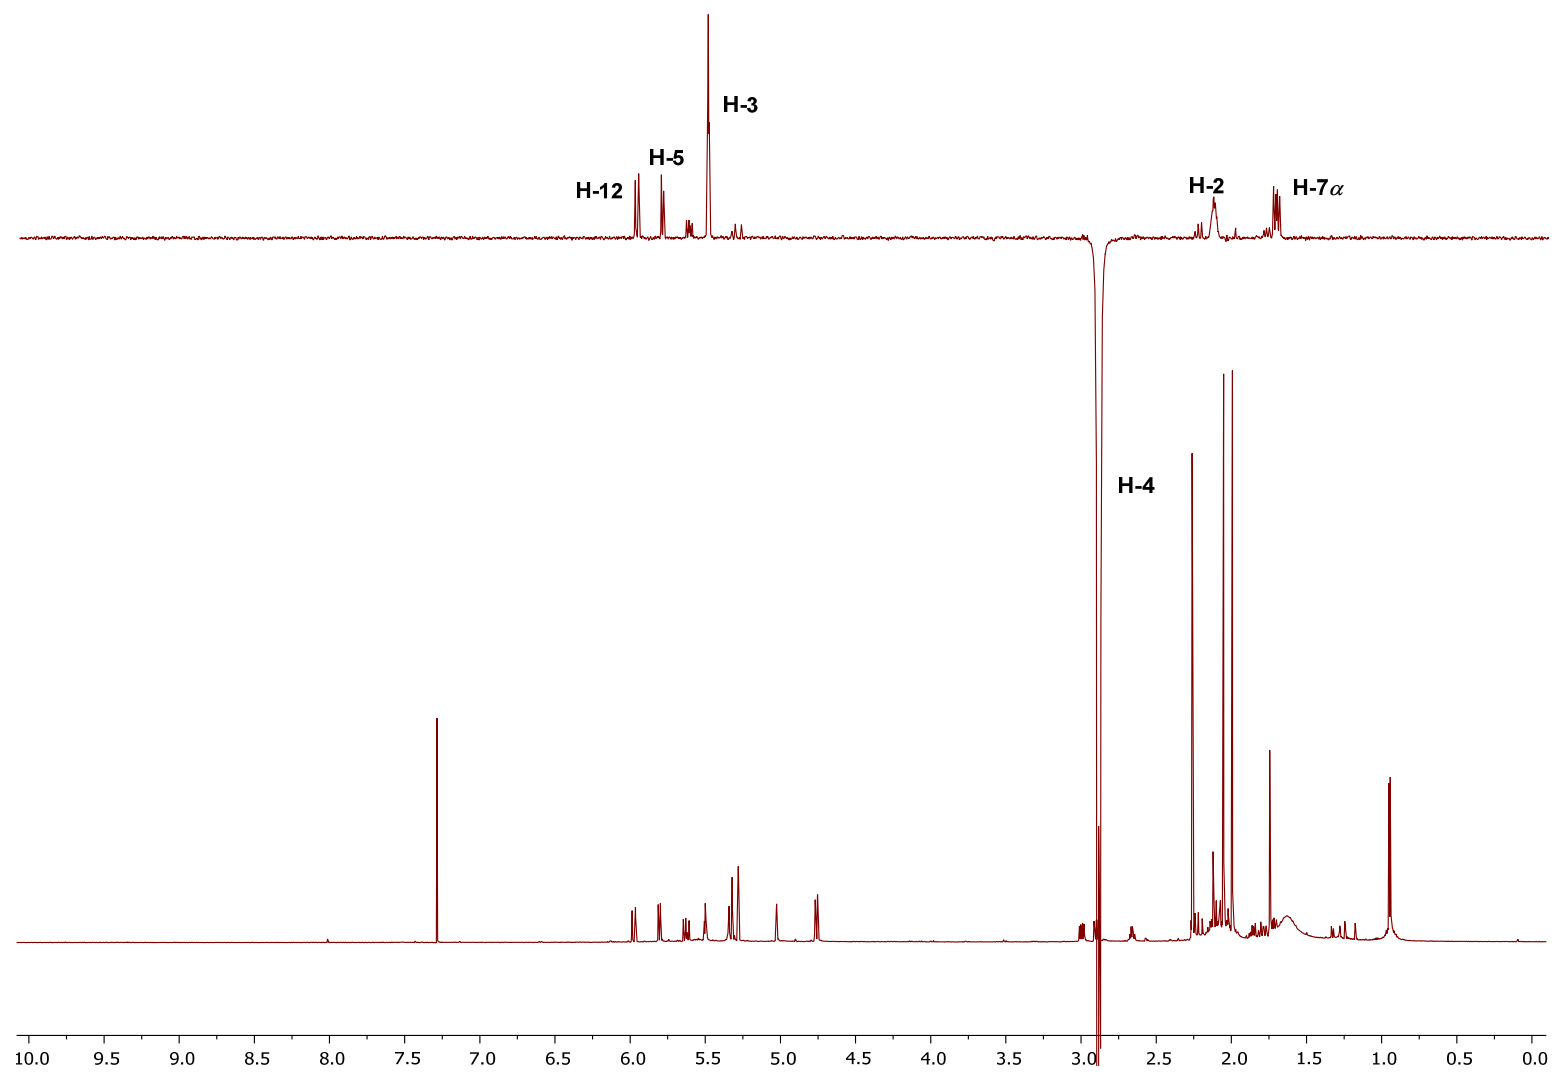

**Figure S42g.** 1D NOESY spectrum of compound 7.

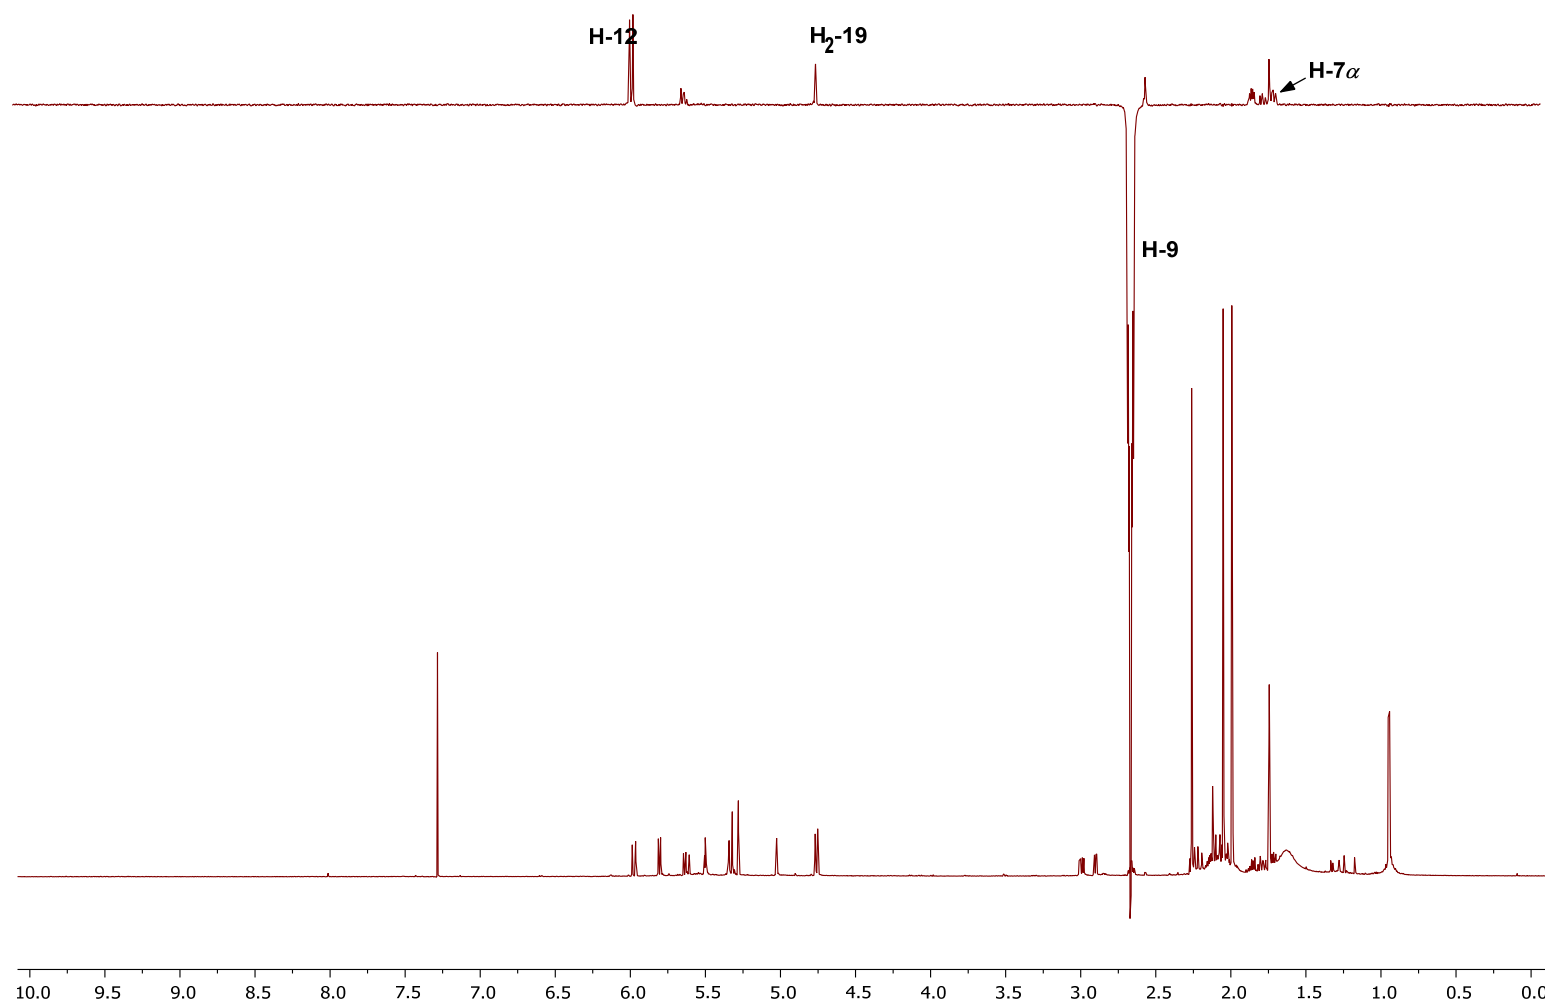

**Figure S42h.** 1D NOESY spectrum of compound 7.

## Elemental Composition Report

Page 1

### Single Mass Analysis

Tolerance = 5.0 mDa / DBE: min = -1.5, max = 50.0

Element prediction: Off

Number of isotope peaks used for i-FIT = 5

Monoisotopic Mass, Even Electron Ions

411 formula(e) evaluated with 7 results within limits (up to 10 closest results for each mass)

Elements Used:

C: 1-500 H: 0-1000 O: 0-200 Na: 0-1 K: 0-1

242\_946-980\_sTREP-EB12-MSe2pos 109 (2.026)

1: TOF MS ES+

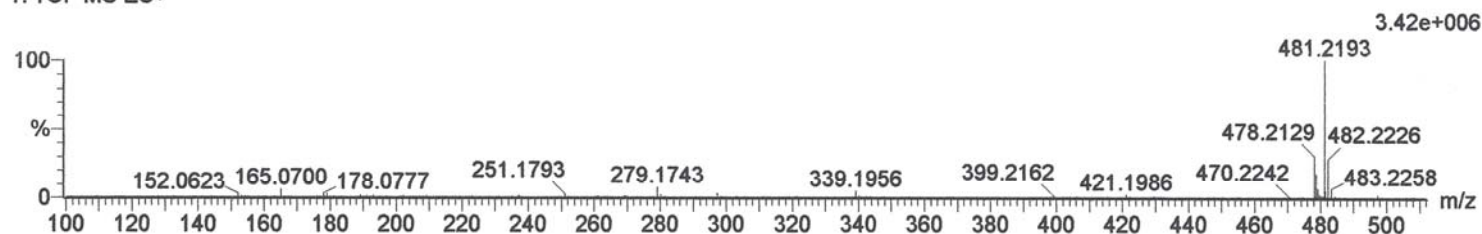

Minimum: -1.5

Maximum: 5.0 10.0 50.0

| Mass     | Calc. Mass | mDa  | PPM  | DBE  | i-FIT  | Norm   | Conf(%) | Formula         |
|----------|------------|------|------|------|--------|--------|---------|-----------------|
| 481.2193 | 481.2202   | -0.9 | -1.9 | 9.5  | 1638.8 | 0.147  | 86.29   | C26 H34 O7 Na   |
|          | 481.2204   | -1.1 | -2.3 | 4.5  | 1654.8 | 16.067 | 0.00    | C23 H38 O8 K    |
|          | 481.2180   | 1.3  | 2.7  | 1.5  | 1654.5 | 15.837 | 0.00    | C21 H39 O8 Na K |
|          | 481.2168   | 2.5  | 5.2  | 21.5 | 1646.3 | 7.586  | 0.05    | C35 H29 O2      |
|          | 481.2226   | -3.3 | -6.9 | 12.5 | 1640.7 | 2.003  | 13.50   | C28 H33 O7      |
|          | 481.2145   | 4.8  | 10.0 | 13.5 | 1655.5 | 16.811 | 0.00    | C30 H34 O3 K    |
|          | 481.2143   | 5.0  | 10.4 | 18.5 | 1645.2 | 6.464  | 0.16    | C33 H30 O2 Na   |

Figure S43. HRMS of compound 7.

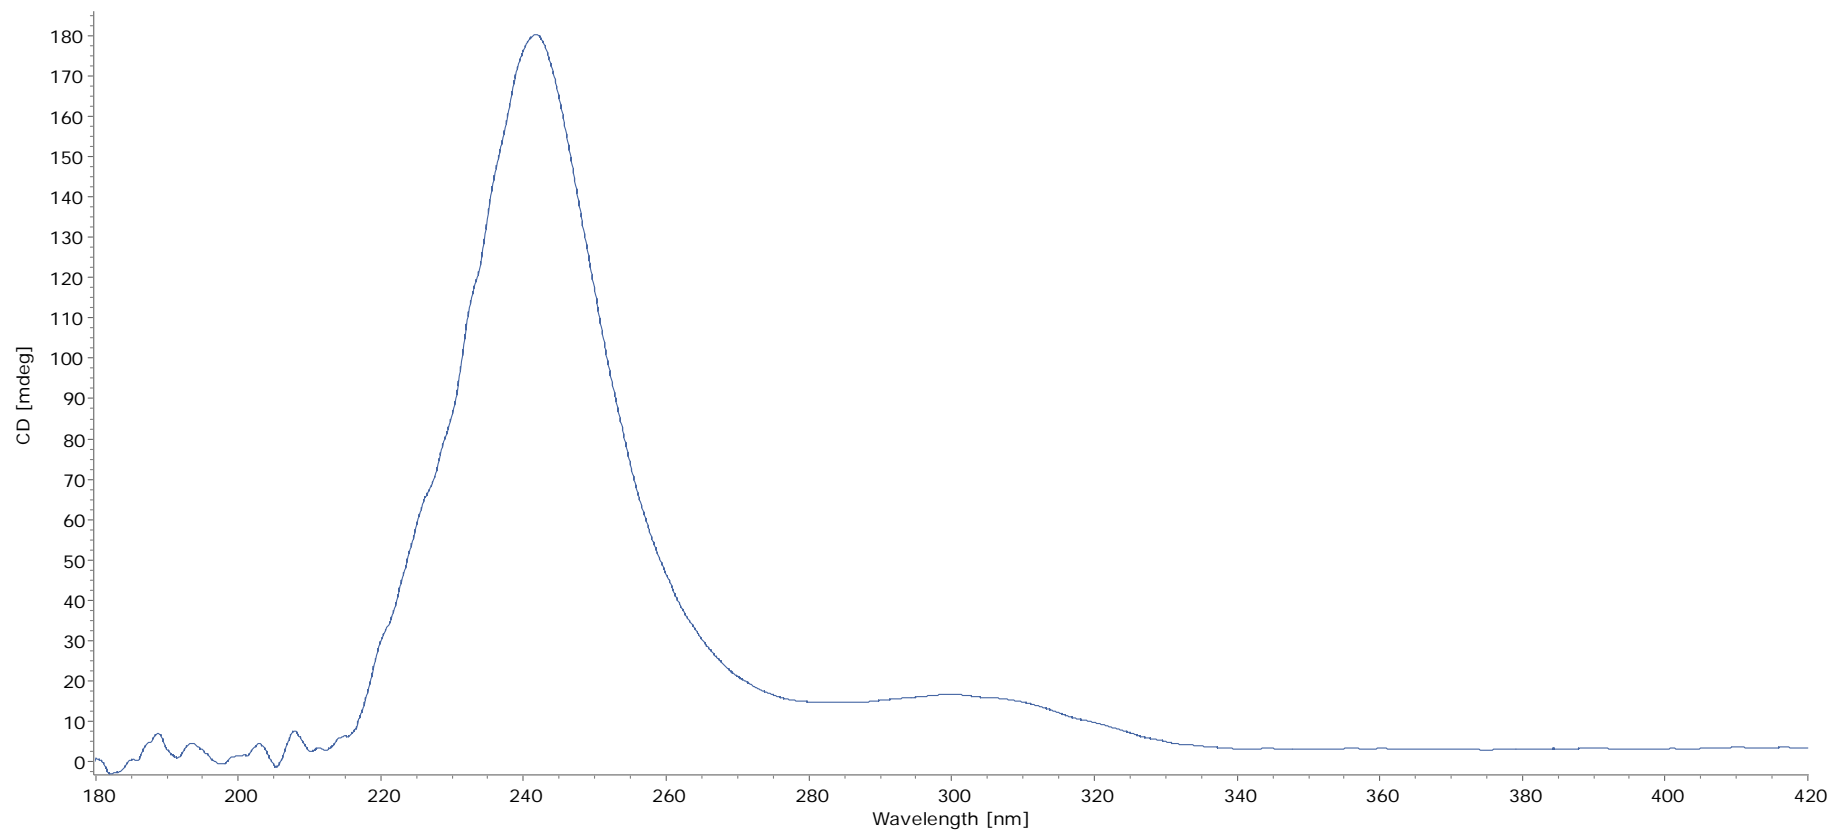

**Figure S44.** ECD of compound 7.
